# Supplementary material for: Metal-free three-component amino- and carbotrideuteromethylthiolation of alkenes in water
Source: Royal Society of Chemistry journal article supplement (doi:10.1039/d4qo01081g), 2024-01-01

# **Metal-Free three-component amino- and carbotrideromethylthiolation of alkenes in water**

Siyu Han,<sup>1</sup> Lin Zhao,<sup>1</sup> Xinyu Zhou,<sup>1</sup> Kemeng Zhang,<sup>1</sup> Yunfei Ma,<sup>1</sup> Ge Wu,<sup>\*1,2</sup>

<sup>a</sup>State Key Laboratory of Macromolecular Drugs and Large-scale Manufacturing, School of Pharmaceutical Sciences, Wenzhou Medical University, Wenzhou 325035, China

<sup>b</sup>State Key Laboratory of Structural Chemistry, Fujian Institute of Research on the Structure of Matter, Chinese Academy of Sciences, Fuzhou, Fujian 350002, China

\*E-mail: wuge@wmu.edu.cn

## **Table of Contents**

|                                                                                          |                |
|------------------------------------------------------------------------------------------|----------------|
| <b>(1) General considerations, experimental data.....</b>                                | <b>S2-S22</b>  |
| <b>(2) <sup>1</sup>H, <sup>13</sup>C and <sup>19</sup>F NMR spectra of products.....</b> | <b>S23-S53</b> |
| <b>(3) HRMS spectra of products.....</b>                                                 | <b>S54-S67</b> |

## General Information

$\text{CD}_3\text{SSO}_3\text{Na}$  is a known compound, which is prepared from our previous literature (Org. Chem. Front., 2023, 10, 3213-3218). All other reagents were purchased from Energy Chemical Company in China and used without further purification.  $^1\text{H}$  NMR (500 MHz),  $^{13}\text{C}$  NMR (125 MHz) and  $^{19}\text{F}$  NMR (470 MHz) spectra were recorded in  $\text{CDCl}_3$  and DMSO- $\text{D}_6$  solutions using a Bruker AVANCE 500 spectrometer. High-resolution mass spectra were recorded on an ESI-Q-TOF mass spectrometer. Analysis of crude reaction mixture was done on the Varian 4000 GC/MS and 1200 LC. All reactions were conducted using standard Schlenk techniques. Column chromatography was performed using EM silica gel 60 (300–400  $\mu\text{m}$ ).

## General Experimental Procedures

### General Procedure of Aminotrideuteromethylthiolation of Alkenes with Arylamines and CD<sub>3</sub>SSO<sub>3</sub>Na:

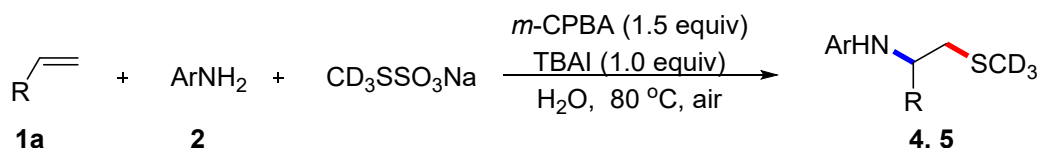

A 25 mL Schlenk tube equipped with a stir bar was charged with substituted alkene (0.2 mmol), arylamines (0.4 mmol), CD<sub>3</sub>SSO<sub>3</sub>Na (0.4 mmol), *m*-CPBA (0.3 mmol), TBAI (0.2 mmol) and 2.0 mL water. Then, the reaction tubes are plugged tightly with teflon stoppers. The reaction mixture was stirred at 80 °C for 24 h. After cooling down, the reaction mixture was diluted with 10 mL of ethyl ether and filtered by silica gel powder, and concentrated under reduced pressure. The residue was then purified by flash chromatography on silica gel to provide the corresponding product.

### General Procedure of Carbotrideuteromethylthiolation of Alkenes with Thiophene and CD<sub>3</sub>SSO<sub>3</sub>Na:

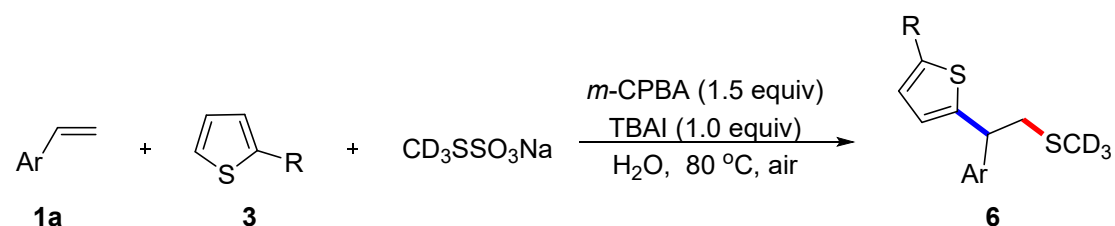

A 25 mL Schlenk tube equipped with a stir bar was charged with substituted alkene (0.2 mmol), substituted thiophene (0.4 mmol), CD<sub>3</sub>SSO<sub>3</sub>Na (0.4 mmol), *m*-CPBA (0.3 mmol), TBAI (0.2 mmol) and 2.0 mL water. Then, the reaction tubes are plugged tightly with teflon stoppers. The reaction mixture was stirred at 80 °C for 24 h. After cooling down, the reaction mixture was diluted with 10 mL of ethyl ether and filtered by silica gel powder, and concentrated under reduced pressure. The residue was then purified by flash chromatography on silica gel to provide the corresponding product.

### Mechanistic Studies

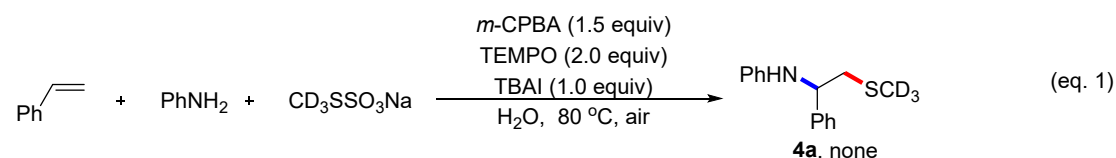

A 25 mL Schlenk tube equipped with a stir bar was charged with styrene (0.2 mmol), aniline (0.4 mmol), CD<sub>3</sub>SSO<sub>3</sub>Na (0.4 mmol), *m*-CPBA (0.3 mmol), TBAI (0.2 mmol), TEMPO (0.4 mmol) and 2.0 mL water. Then, the reaction tubes are plugged tightly with teflon stoppers. The reaction

mixture was stirred at 80 °C for 24 h. After cooling down, the reaction mixture was diluted with 10 mL of ethyl ether and filtered by silica gel powder, none of **4a** was detected by GC-MS.

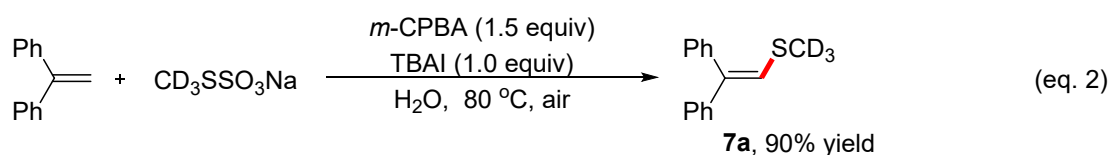

A 25 mL Schlenk tube equipped with a stir bar was charged with 1,1-diphenylethylene (0.2 mmol), CD<sub>3</sub>SSO<sub>3</sub>Na (0.4 mmol), m-CPBA (0.3 mmol), TBAI (0.2 mmol) and 2.0 mL water. The tube was fitted with a rubber septum, and then the reaction mixture was stirred at 80 °C for 24 h. After the reaction mixture was cooled to room temperature and the reaction was filtered through a pad of Celite and diluted with ethyl acetate (10 mL), **7a** was isolated.

The NMR data of the target product **7a** is consistent with previously our reported publication (Org. Chem. Front., 2023, 10, 3213-3218).

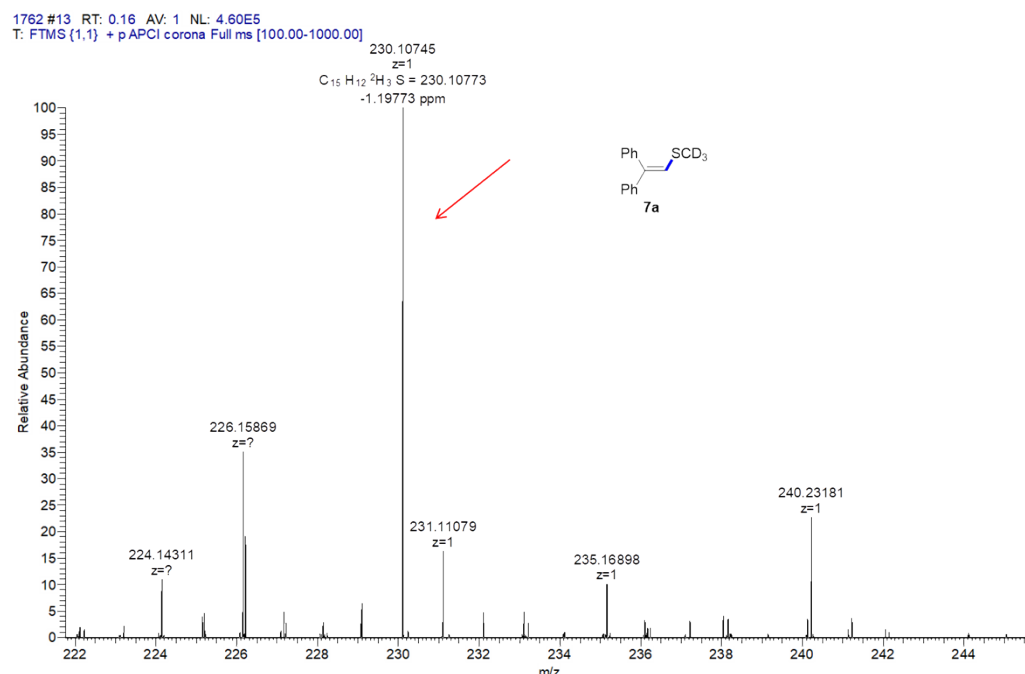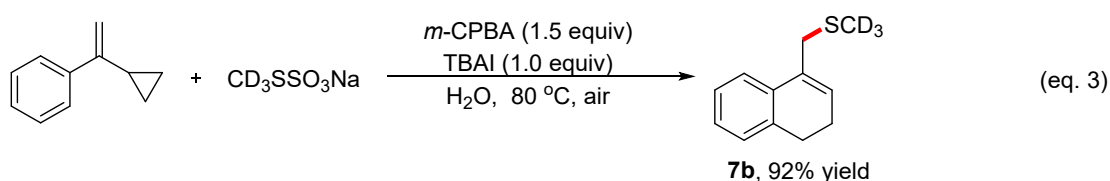

A 25 mL Schlenk tube equipped with a stir bar was charged with (1-cyclopropylvinyl)benzene (0.2 mmol), CD<sub>3</sub>SSO<sub>3</sub>Na (0.4 mmol), m-CPBA (0.3 mmol), TBAI (0.2 mmol) and 2.0 mL water. The tube was fitted with a rubber septum, and then the reaction mixture was stirred at 80 °C for 24 h. After the reaction mixture was cooled to room temperature and the reaction was filtered through a pad of Celite and diluted with ethyl acetate (10 mL), **7b** was isolated.

**((3,4-dihydronaphthalen-1-yl)methyl)(methyl-d3)sulfane**

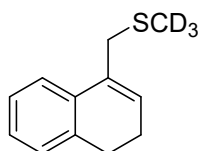

**7b**

$^1\text{H NMR}$  (400 MHz,  $\text{CDCl}_3$ ):  $\delta$  7.38 (d,  $J = 4.3$  Hz, 4H), 7.33-7.28 (m, 1H), 6.19-6.17 (m, 1H), 3.55 (s, 2H), 2.82 (t,  $J = 5.9$  Hz, 2H), 2.58 (dp,  $J = 5.9, 2.0$  Hz, 2H).

$^{13}\text{C NMR}$  (100 MHz,  $\text{CDCl}_3$ ):  $\delta$  142.51, 134.96, 128.46, 127.18, 125.75, 125.50, 27.69, 26.85, 24.47.

**HRMS** (ESI): calcd for  $\text{C}_{12}\text{H}_{12}\text{D}_3\text{S}$   $[\text{M} + \text{H}]^+$  194.1083, found 194.1075.

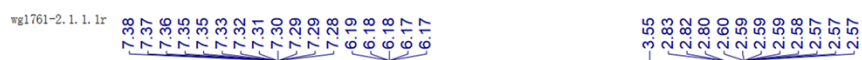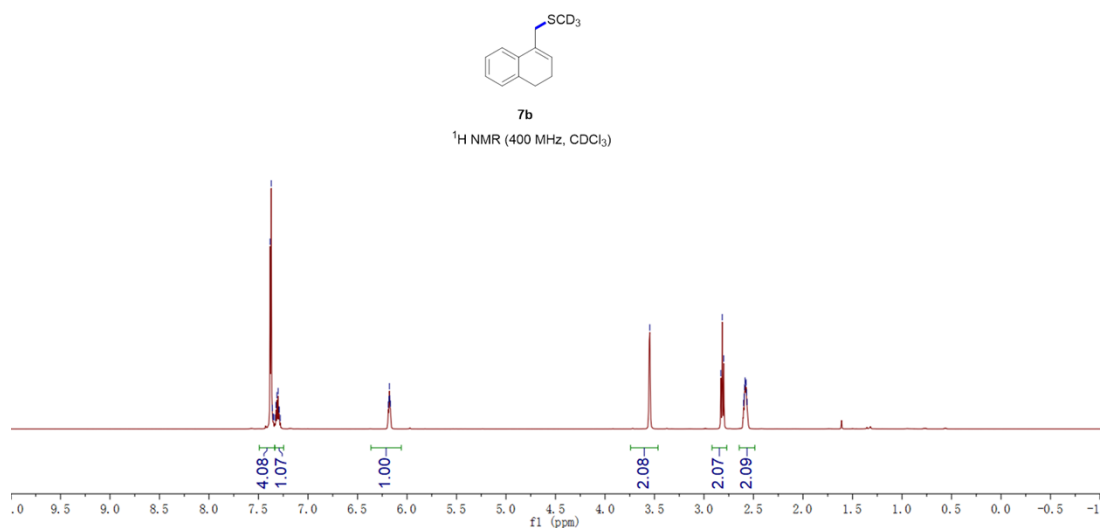

pdata/C

142.51  
134.96  
128.46  
127.18  
125.50

27.69  
26.85  
24.47

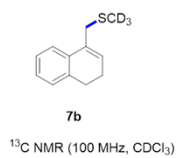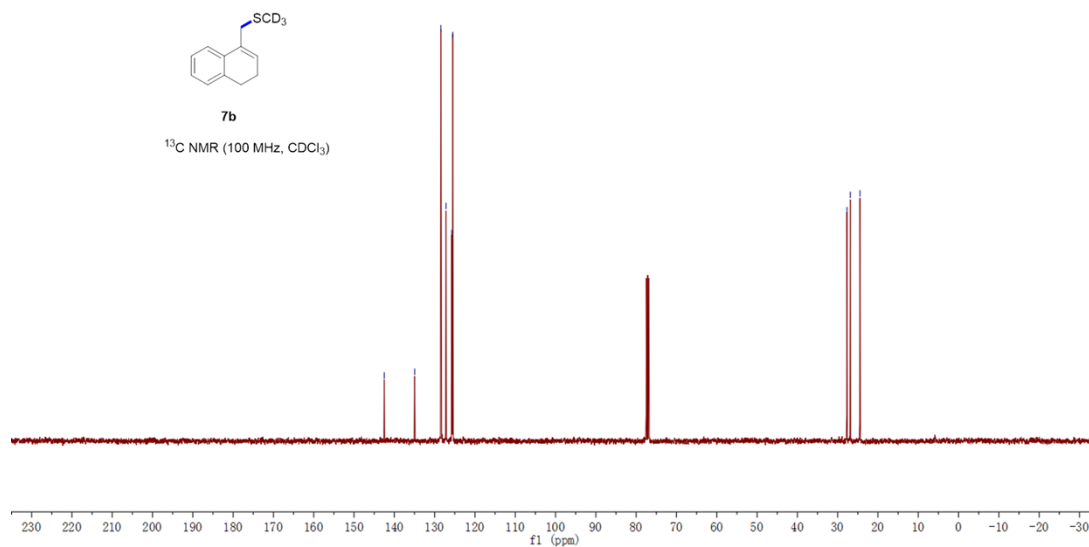

1761-2

wy202401083134(0.691)AV2(Ar,20000,0,0,0,0);Om(34&x1.500)

1: TCFMSES+  
6.15e3

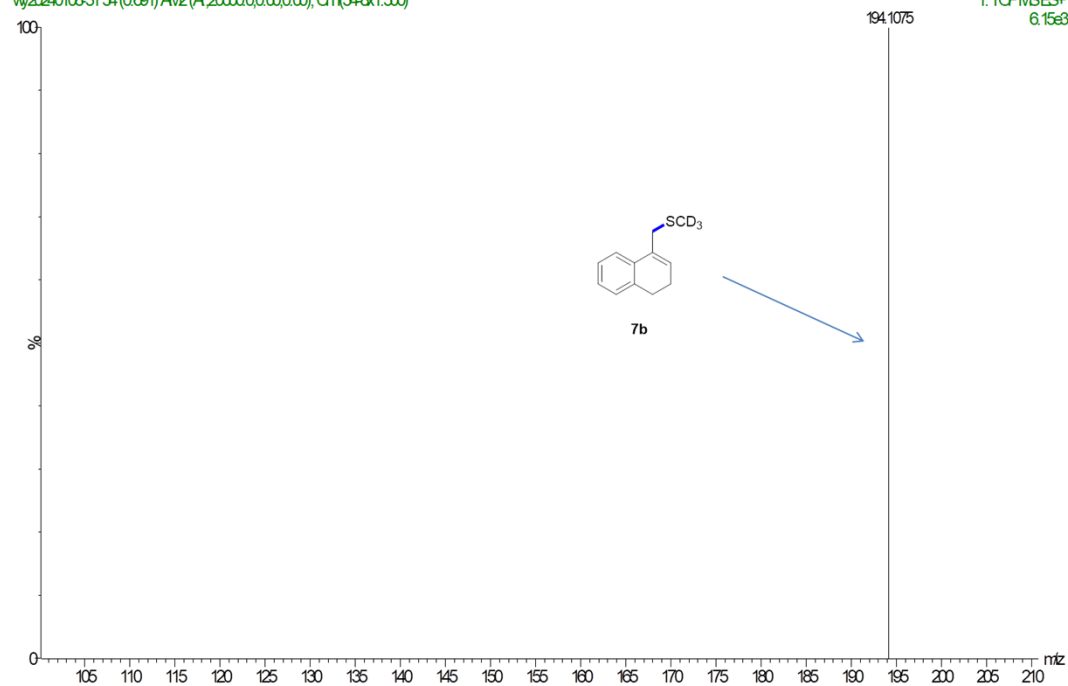

### Cyclic Voltammetry Studies

The cyclic voltammograms were recorded in an electrolyte of  $\text{Bu}_4\text{NPF}_6$  (0.1 M) in  $\text{CH}_3\text{CN}$  using a glassy carbon disk working electrode (diameter, 3 mm), a Pt wire auxiliary electrode and a SCE reference electrode. The scan rate is 100 mV/s.

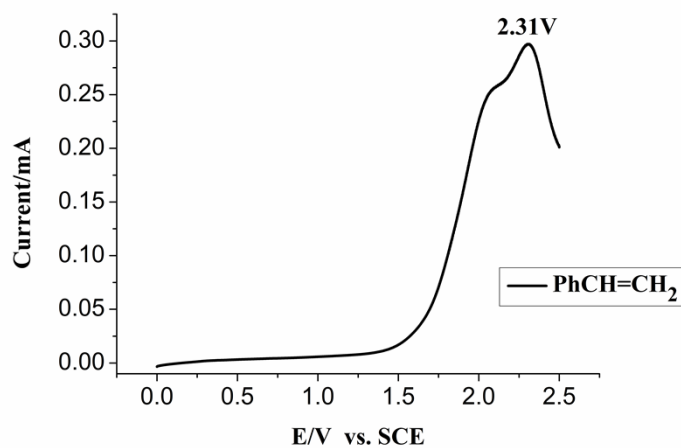

**Figure S1:**

Figure S1: Cyclic voltammogram of 10 mM  $\text{PhCH}=\text{CH}_2$  obtained in  $\text{CH}_3\text{CN}$  containing 0.1 M  $\text{Bu}_4\text{NPF}_6$  at a 3 mm diameter planar glassy carbon (GC) electrode and at a scan rate of  $0.1 \text{ V s}^{-1}$  at room temperature. Starting point is 0 v and positive direction of scan.

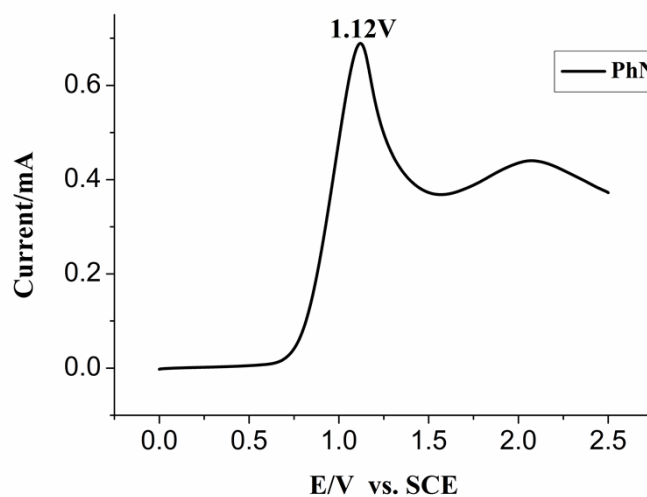

**Figure S2**

Figure S2: Cyclic voltammogram of 10 mM  $\text{PhNH}_2$  obtained in  $\text{CH}_3\text{CN}$  containing 0.1 M  $\text{Bu}_4\text{NPF}_6$  at a 3 mm diameter planar glassy carbon (GC) electrode and at a scan rate of  $0.1 \text{ V s}^{-1}$  at room temperature. Starting point is 0 v and positive direction of scan.

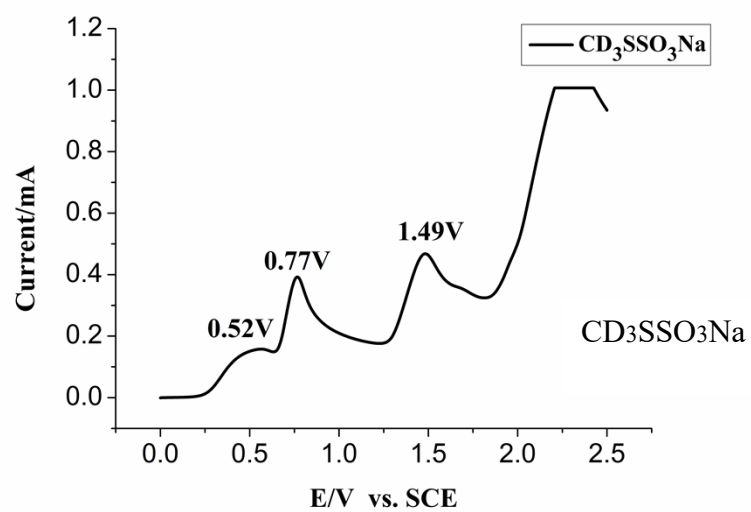

**Figure S3**

Figure S3: Cyclic voltammogram of 10 mM  $\text{CD}_3\text{SSO}_3\text{Na}$  obtained in  $\text{CH}_3\text{CN}$  containing 0.1 M  $\text{Bu}_4\text{NPF}_6$  at a 3 mm diameter planar glassy carbon (GC) electrode and at a scan rate of  $0.1 \text{ V s}^{-1}$  at room temperature. Starting point is 0 v and positive direction of scan.



## Characterization of Products in Details :

### N-(2-((methyl-d3)thio)-1-phenylethyl)aniline

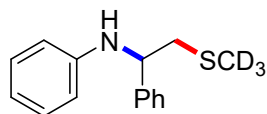

#### 4a

Following the general procedure, using (petroleum ether : EtOAc = 9 : 1) as the eluant afforded a yellow liquid (42.3 mg, 86% yield). **<sup>1</sup>H NMR** (400 MHz, CDCl<sub>3</sub>): δ 7.48 (d, *J* = 7.5 Hz, 2H), 7.41 (t, *J* = 7.5 Hz, 2H), 7.33 (t, *J* = 7.2 Hz, 1H), 7.17 (t, *J* = 7.9 Hz, 2H), 6.75 (t, *J* = 7.3 Hz, 1H), 6.62 (d, *J* = 7.8 Hz, 2H), 4.72 (s, 1H), 4.50 (dd, *J* = 9.1, 4.5 Hz, 1H), 3.06 (dd, *J* = 13.6, 4.5 Hz, 1H), 2.86 (dd, *J* = 13.6, 9.0 Hz, 1H). **<sup>13</sup>C NMR** (100 MHz, CDCl<sub>3</sub>): δ 147.55, 142.89, 129.20, 128.94, 127.58, 126.45, 117.95, 113.98, 56.43, 42.52. **HRMS** (ESI): calcd for C<sub>15</sub>H<sub>15</sub>DN<sub>2</sub>S [M + H]<sup>+</sup> 247.1343, found 247.1340.

### 2,4-dimethyl-N-(2-((methyl-d3)thio)-1-phenylethyl)aniline

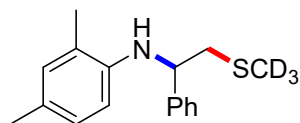

#### 4b

Following the general procedure, using (petroleum ether : EtOAc = 9 : 1) as the eluant afforded a yellow liquid (49.8 mg, 91% yield). **<sup>1</sup>H NMR** (400 MHz, CDCl<sub>3</sub>): δ 7.48 (d, *J* = 7.3 Hz, 2H), 7.41 (t, *J* = 7.5 Hz, 2H), 7.33 (t, *J* = 7.3 Hz, 1H), 6.99 (s, 1H), 6.81 (d, *J* = 8.1 Hz, 1H), 6.29 (d, *J* = 8.1 Hz, 1H), 4.60 (s, 1H), 4.49 (dd, *J* = 9.3, 4.2 Hz, 1H), 3.10 (dd, *J* = 13.6, 4.3 Hz, 1H), 2.89 (dd, *J* = 13.6, 9.4 Hz, 1H), 2.37 (s, 3H), 2.27 (s, 3H). **<sup>13</sup>C NMR** (100 MHz, CDCl<sub>3</sub>): δ 143.27, 143.24, 131.01, 128.94, 127.49, 127.20, 126.66, 126.40, 123.15, 111.75, 56.45, 42.81, 20.45, 17.75. **HRMS** (ESI): calcd for C<sub>17</sub>H<sub>18</sub>DN<sub>2</sub>NaS [M + Na]<sup>+</sup> 297.1481, found 297.1479.

### 4-isopropyl-N-(2-((methyl-d3)thio)-1-phenylethyl)aniline

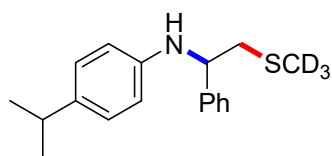

**4c**

Following the general procedure, using (petroleum ether : EtOAc = 9 : 1) as the eluant afforded a yellow liquid (51.8 mg, 90% yield). **<sup>1</sup>H NMR** (400 MHz, CDCl<sub>3</sub>): δ 7.50 (d, *J* = 7.4 Hz, 2H), 7.42 (t, *J* = 7.5 Hz, 2H), 7.34 (t, *J* = 7.3 Hz, 1H), 7.05 (d, *J* = 8.4 Hz, 2H), 6.59 (d, *J* = 8.4 Hz, 2H), 4.64 (s, 1H), 4.46 (dd, *J* = 9.2, 4.4 Hz, 1H), 3.04 (dd, *J* = 13.6, 4.4 Hz, 1H), 2.85 (dd, *J* = 13.7, 8.7 Hz, 2H), 1.25 (d, *J* = 6.9 Hz, 6H). **<sup>13</sup>C NMR** (100 MHz, CDCl<sub>3</sub>): δ 145.64, 143.24, 138.39, 128.93, 127.53, 127.06, 126.50, 114.01, 56.73, 42.65, 33.23, 24.32. **HRMS** (ESI): calcd for C<sub>18</sub>H<sub>21</sub>D<sub>3</sub>NS [M + H]<sup>+</sup> 289.1818, found 289.1813.

#### 4-fluoro-N-(2-((methyl-d3)thio)-1-phenylethyl)aniline

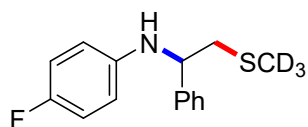

**4d**

Following the general procedure, using (petroleum ether : EtOAc = 9 : 1) as the eluant afforded a yellow liquid (38.0 mg, 72% yield). **<sup>1</sup>H NMR** (400 MHz, CDCl<sub>3</sub>): δ 7.49-7.40 (m, 4H), 7.35 (t, *J* = 7.1 Hz, 1H), 6.88 (t, *J* = 8.7 Hz, 2H), 6.56 (dd, *J* = 7.8, 5.5 Hz, 2H), 4.62 (brs, 1H), 4.43 (dd, *J* = 9.3, 4.4 Hz, 1H), 3.06 (dd, *J* = 13.7, 4.4 Hz, 1H), 2.85 (dd, *J* = 13.6, 9.2 Hz, 1H). **<sup>13</sup>C NMR** (100 MHz, CDCl<sub>3</sub>): δ 156.14 (d, *J* = 235.4 Hz), 143.94 (d, *J* = 1.9 Hz), 142.74, 129.02, 127.70, 126.47, 115.63 (d, *J* = 22.2 Hz), 114.85 (d, *J* = 7.3 Hz), 56.97, 42.59. **<sup>19</sup>F NMR** (375 MHz, CDCl<sub>3</sub>) δ -127.32 (1F); **HRMS** (ESI): calcd for C<sub>15</sub>H<sub>12</sub>D<sub>3</sub>NFS [M - H]<sup>+</sup> 263.1098, found 263.1099.

#### 4-chloro-N-(2-((methyl-d3)thio)-1-phenylethyl)aniline

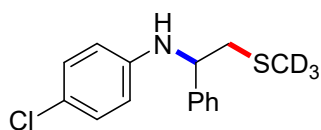

**4e**

Following the general procedure, using (petroleum ether : EtOAc = 9 : 1) as the eluant afforded a yellow liquid (36.4 mg, 65% yield). **<sup>1</sup>H NMR** (400 MHz, CDCl<sub>3</sub>): δ 7.46-7.39 (m, 4H), 7.36-7.32 (m, 1H), 7.10 (d, *J* = 8.8 Hz, 2H), 6.53 (d, *J* = 8.8 Hz, 2H), 4.76 (s, 1H), 4.45 (dt, *J* = 8.2, 3.8 Hz, 1H), 3.05 (dd, *J* = 13.7, 4.4 Hz, 1H), 2.84 (dd, *J* = 13.7, 9.1 Hz, 1H). **<sup>13</sup>C NMR** (100 MHz, CDCl<sub>3</sub>): δ 146.08, 142.37, 129.04, 127.76, 126.39, 122.57, 115.10, 56.47, 42.44. **HRMS** (ESI): calcd for C<sub>15</sub>H<sub>12</sub>D<sub>3</sub>NSCl [M - H]<sup>+</sup> 279.0802, found 279.0807.

#### 4-bromo-N-(2-((methyl-d3)thio)-1-phenylethyl)aniline

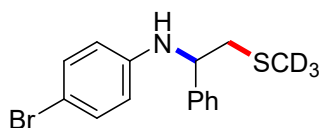

**4f**

Following the general procedure, using (petroleum ether : EtOAc = 9 : 1) as the eluant afforded a yellow liquid (47.9 mg, 74% yield). **<sup>1</sup>H NMR** (400 MHz, CDCl<sub>3</sub>): δ 7.45-7.39 (m, 4H), 7.35-7.32 (m, 1H), 7.23 (d, *J* = 8.8 Hz, 2H), 6.48 (d, *J* = 8.8 Hz, 2H), 4.77 (s, 1H), 4.44 (d, *J* = 6.1 Hz, 1H), 3.05 (dd, *J* = 13.7, 4.5 Hz, 1H), 2.84 (dd, *J* = 13.7, 9.1 Hz, 1H). **<sup>13</sup>C NMR** (100 MHz, CDCl<sub>3</sub>): δ 146.48, 142.28, 131.91, 129.05, 127.77, 126.38, 115.60, 109.69, 56.37, 42.42. **HRMS** (ESI): calcd for C<sub>15</sub>H<sub>12</sub>D<sub>3</sub>NBrS [M - H]<sup>+</sup> 323.0302, found 323.0307.

#### 4-(tert-butyl)-N-(2-((methyl-d3)thio)-1-phenylethyl)aniline

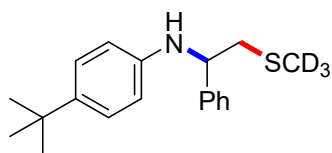

**4g**

Following the general procedure, using (petroleum ether : EtOAc = 9 : 1) as the eluant afforded a yellow liquid (54.9 mg, 91% yield). **<sup>1</sup>H NMR** (400 MHz, CDCl<sub>3</sub>): δ 7.52 (d, *J* = 7.4 Hz, 2H), 7.44 (t, *J* = 7.5 Hz, 2H), 7.36 (t, *J* = 7.2 Hz, 1H), 7.23 (d, *J* = 8.6 Hz, 2H), 6.62 (d, *J* = 8.6 Hz, 2H), 4.68 (s, 1H), 4.49 (dd, *J* = 9.3, 4.4 Hz, 1H), 3.06 (dd, *J* = 13.6, 4.4 Hz, 1H), 2.87 (dd, *J* = 13.6, 9.3 Hz, 1H), 1.34 (s, 9H). **<sup>13</sup>C NMR** (100 MHz, CDCl<sub>3</sub>): δ 145.31, 143.31, 140.64, 128.96, 127.56, 126.53, 125.99, 113.73, 56.75, 42.70, 33.96, 31.66. **HRMS** (ESI): calcd for C<sub>19</sub>H<sub>23</sub>D<sub>3</sub>NS [M + H]<sup>+</sup>

303.1974, found 303.1971.

**N-(2-((methyl-d3)thio)-1-phenylethyl)-4-(trifluoromethyl)aniline**

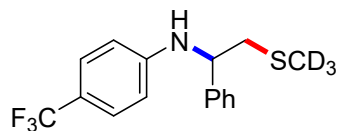

**4h**

Following the general procedure, using (petroleum ether : EtOAc = 9 : 1) as the eluant afforded a yellow liquid (43.9 mg, 70% yield). <sup>1</sup>H NMR (400 MHz, CDCl<sub>3</sub>): δ 7.45-7.35 (m, 7H), 6.62 (d, *J* = 8.4 Hz, 2H), 5.05 (s, 1H), 4.55-4.53 (m, 1H), 3.08 (dd, *J* = 13.7, 4.5 Hz, 1H), 2.87 (dd, *J* = 13.7, 9.0 Hz, 1H). <sup>13</sup>C NMR (100 MHz, CDCl<sub>3</sub>): δ 149.95, 141.91, 129.11, 127.89, 126.55 (q, *J* = 3.8 Hz), 126.30, 123.69 (q, *J* = 270.5 Hz), 119.43 (q, *J* = 32.6 Hz), 113.16, 56.05, 42.29. <sup>19</sup>F NMR (375 MHz, CDCl<sub>3</sub>) δ -60.93 (3F); HRMS (ESI): calcd for C<sub>16</sub>H<sub>12</sub>D<sub>3</sub>NF<sub>3</sub>S [M - H]<sup>+</sup> 313.1066, found 313.1063.

**trifluoro(4-((2-((methyl-d3)thio)-1-phenylethyl)amino)phenyl)-l6-methanone**

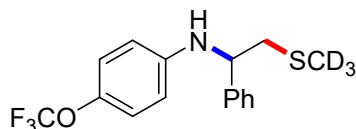

**4i**

Following the general procedure, using (petroleum ether : EtOAc = 9 : 1) as the eluant afforded a yellow liquid (56.1 mg, 85% yield). <sup>1</sup>H NMR (400 MHz, CDCl<sub>3</sub>): δ 7.52 – 7.38 (m, 4H), 7.34 (t, *J* = 7.0 Hz, 1H), 7.01 (d, *J* = 8.6 Hz, 2H), 6.56 (d, *J* = 8.9 Hz, 2H), 4.80 (s, 1H), 4.44 (dd, *J* = 9.3, 4.4 Hz, 1H), 3.05 (dd, *J* = 13.7, 4.2 Hz, 1H), 2.84 (dd, *J* = 13.7, 9.3 Hz, 1H). <sup>13</sup>C NMR (100 MHz, CDCl<sub>3</sub>): δ 146.32, 142.37, 140.89, 129.05, 127.78, 126.35, 122.30, 119.50 (d, *J* = 255.3 Hz), 114.25, 56.58, 42.48. <sup>19</sup>F NMR (375 MHz, CDCl<sub>3</sub>) δ -58.35 (3F); HRMS (ESI): calcd for C<sub>16</sub>H<sub>14</sub>D<sub>3</sub>NOF<sub>3</sub>S [M + H]<sup>+</sup> 331.1171, found 331.1162.

**N-(2-((methyl-d3)thio)-1-phenylethyl)-4-((trifluoromethyl)thio)aniline**

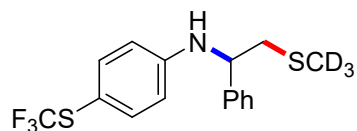

**4j**

Following the general procedure, using (petroleum ether : EtOAc = 9 : 1) as the eluant afforded a yellow liquid (56.7 mg, 82% yield). **<sup>1</sup>H NMR** (400 MHz, CDCl<sub>3</sub>): δ 7.47-7.34 (m, 7H), 6.61 (d, *J* = 8.7 Hz, 2H), 5.05 (d, *J* = 4.0 Hz, 1H), 4.53 (dt, *J* = 8.8, 4.3 Hz, 1H), 3.08 (dd, *J* = 13.7, 4.5 Hz, 1H), 2.88 (dd, *J* = 13.7, 9.0 Hz, 1H). **<sup>13</sup>C NMR** (100 MHz, CDCl<sub>3</sub>): δ 149.67, 141.91, 138.16, 131.42 (d, *J* = 308.4 Hz), 129.13, 127.92, 126.31, 114.36, 110.49, 56.11, 42.32. **<sup>19</sup>F NMR** (375 MHz, CDCl<sub>3</sub>) δ -44.28 (3F); **HRMS** (ESI): calcd for C<sub>16</sub>H<sub>12</sub>D<sub>3</sub>NF<sub>3</sub>S<sub>2</sub> [M - H]<sup>+</sup> 345.0786, found 345.0784.

**4-((2-((methyl-d3)thio)-1-phenylethyl)amino)benzonitrile**

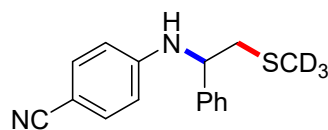

**4k**

Following the general procedure, using (petroleum ether : EtOAc = 9 : 1) as the eluant afforded a yellow liquid (41.7 mg, 77% yield). **<sup>1</sup>H NMR** (400 MHz, CDCl<sub>3</sub>): δ 7.40-7.30 (m, 7H), 6.55 (d, *J* = 8.8 Hz, 2H), 5.24 (d, *J* = 4.4 Hz, 1H), 4.53 (dt, *J* = 8.9, 4.5 Hz, 1H), 3.05 (dd, *J* = 13.7, 4.5 Hz, 1H), 2.87 (dd, *J* = 13.7, 8.8 Hz, 1H). **<sup>13</sup>C NMR** (100 MHz, CDCl<sub>3</sub>): δ 150.56, 141.28, 133.61, 129.15, 128.02, 126.21, 120.41, 113.53, 99.49, 55.89, 42.11. **HRMS** (ESI): calcd for C<sub>16</sub>H<sub>14</sub>D<sub>3</sub>N<sub>2</sub>S [M + H]<sup>+</sup> 272.1301, found 272.1299.

**2,4,6-trimethoxy-N-(2-((methyl-d3)thio)-1-phenylethyl)aniline**

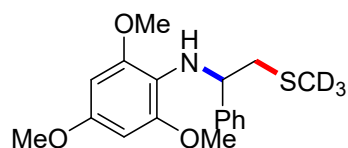

**4l**

Following the general procedure, using (petroleum ether : EtOAc = 9 : 1) as the eluant afforded a

yellow solid (46.4 mg, 69% yield), Mp = 90-91 °C. <sup>1</sup>H NMR (400 MHz, CDCl<sub>3</sub>): δ 7.44-7.36 (m, 4H), 7.30 (t, *J* = 7.1 Hz, 1H), 6.17 (s, 1H), 5.74 (s, 1H), 4.47-4.44 (m, 1H), 3.98 (s, 3H), 3.77 (s, 3H), 3.55 (s, 3H), 3.04 (dd, *J* = 13.6, 4.7 Hz, 1H), 2.95 (dd, *J* = 13.6, 9.0 Hz, 1H). <sup>13</sup>C NMR (100 MHz, CDCl<sub>3</sub>): δ 155.84, 154.73, 145.78, 143.04, 133.89, 128.98, 127.66, 126.35, 104.64, 92.31, 61.60, 61.16, 57.82, 55.47, 42.65. HRMS (ESI): calcd for C<sub>18</sub>H<sub>19</sub>D<sub>3</sub>NO<sub>3</sub>S [M - H]<sup>+</sup> 335.1509, found 335.1500.

#### 4-((2-((methyl-d3)thio)-1-phenylethyl)amino)benzenesulfonamide

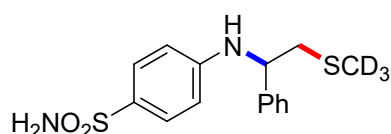

#### 4m

Following the general procedure, using (petroleum ether : EtOAc = 9 : 1) as the eluant afforded a yellow liquid (42.2 mg, 65% yield). <sup>1</sup>H NMR (400 MHz, CDCl<sub>3</sub>): δ 7.59 (d, *J* = 8.8 Hz, 2H), 7.39-7.28 (m, 5H), 6.54 (d, *J* = 8.8 Hz, 2H), 5.27 (d, *J* = 4.7 Hz, 1H), 5.06 (s, 2H), 4.54 (dt, *J* = 9.1, 4.7 Hz, 1H), 3.02 (dd, *J* = 13.7, 4.7 Hz, 1H), 2.87 (dd, *J* = 13.7, 8.7 Hz, 1H). <sup>13</sup>C NMR (100 MHz, CDCl<sub>3</sub>): δ 150.74, 141.46, 129.47, 129.09, 128.29, 127.93, 126.34, 112.98, 56.02, 42.04. HRMS (ESI): calcd for C<sub>15</sub>H<sub>15</sub>D<sub>3</sub>N<sub>2</sub>O<sub>2</sub>NaS<sub>2</sub> [M + Na]<sup>+</sup> 348.0896, found 348.0896.

#### N-(2-((methyl-d3)thio)-1-phenylethyl)-6-(trifluoromethoxy)benzo[d]thiazol-2-amine

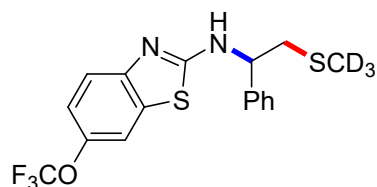

#### 4n

Following the general procedure, using (petroleum ether : EtOAc = 9 : 1) as the eluant afforded a yellow liquid (68.1 mg, 88% yield). <sup>1</sup>H NMR (400 MHz, CDCl<sub>3</sub>): δ 7.52 (d, *J* = 8.8 Hz, 1H), 7.47-7.17 (m, 6H), 7.18 (d, *J* = 8.8 Hz, 1H), 6.77 (s, 1H), 4.92 (dd, *J* = 7.6, 5.5 Hz, 1H), 3.10-3.00 (m, 2H). <sup>13</sup>C NMR (100 MHz, CDCl<sub>3</sub>): δ 167.65, 150.77, 143.74, 140.18, 131.48, 129.02, 128.32,

126.72, 124.49 (d,  $J = 256.5$  Hz), 119.78, 119.39, 114.09, 58.41, 41.32.  $^{19}\text{F}$  NMR (375 MHz,  $\text{CDCl}_3$ )  $\delta$  -58.21 (3F); HRMS (ESI): calcd for  $\text{C}_{17}\text{H}_{13}\text{D}_3\text{N}_2\text{OF}_3\text{S}_2$   $[\text{M} + \text{H}]^+$  388.0844, found 388.0850.

**ethyl 4-((2-((methyl-d3)thio)-1-phenylethyl)amino)benzoate**

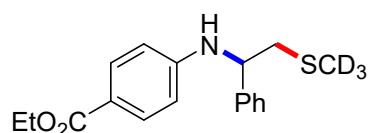

**4o**

Following the general procedure, using (petroleum ether : EtOAc = 9 : 1) as the eluant afforded a yellow liquid (50.2 mg, 79% yield).  $^1\text{H}$  NMR (400 MHz,  $\text{CDCl}_3$ ):  $\delta$  7.86 (d,  $J = 8.5$  Hz, 2H), 7.43-7.30 (m, 5H), 6.57 (d,  $J = 8.6$  Hz, 2H), 5.16 (d,  $J = 4.5$  Hz, 1H), 4.58 (dt,  $J = 8.9, 4.6$  Hz, 1H), 4.33 (q,  $J = 7.1$  Hz, 2H), 3.05 (dd,  $J = 13.7, 4.6$  Hz, 1H), 2.88 (dd,  $J = 13.7, 8.7$  Hz, 1H), 1.37 (t,  $J = 7.1$  Hz, 3H).  $^{13}\text{C}$  NMR (100 MHz,  $\text{CDCl}_3$ ):  $\delta$  166.85, 151.07, 141.83, 131.38, 129.02, 127.81, 126.33, 119.38, 112.77, 60.27, 55.96, 42.15, 14.52. HRMS (ESI): calcd for  $\text{C}_{18}\text{H}_{18}\text{D}_3\text{NO}_2\text{NaS}$   $[\text{M} + \text{Na}]^+$  341.1379, found 341.1378.

**N-(1-(4-chlorophenyl)-2-((methyl-d3)thio)ethyl)aniline**

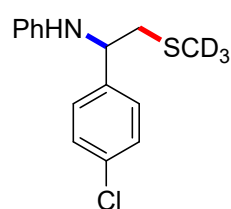

**5a**

Following the general procedure, using (petroleum ether : EtOAc = 9 : 1) as the eluant afforded a yellow liquid (47.0 mg, 84% yield).  $^1\text{H}$  NMR (400 MHz,  $\text{CDCl}_3$ ):  $\delta$  7.39 (q,  $J = 8.6$  Hz, 4H), 7.17 (t,  $J = 7.9$  Hz, 2H), 6.77 (t,  $J = 7.3$  Hz, 1H), 6.59 (d,  $J = 7.8$  Hz, 2H), 4.71 (s, 1H), 4.46 (dd,  $J = 8.9, 4.4$  Hz, 1H), 3.02 (dd,  $J = 13.6, 4.5$  Hz, 1H), 2.82 (dd,  $J = 13.6, 9.0$  Hz, 1H).  $^{13}\text{C}$  NMR (100 MHz,  $\text{CDCl}_3$ ):  $\delta$  147.23, 141.48, 133.17, 129.25, 129.12, 127.86, 118.23, 114.01, 55.84, 42.42. HRMS (ESI): calcd for  $\text{C}_{15}\text{H}_{12}\text{D}_3\text{NSCl}$   $[\text{M} - \text{H}]^+$  279.0802, found 279.0793.

### N-(2-((methyl-d3)thio)-1-(p-tolyl)ethyl)aniline

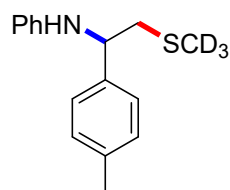

**5b**

Following the general procedure, using (petroleum ether : EtOAc = 9 : 1) as the eluant afforded a yellow liquid (46.8 mg, 90% yield). **<sup>1</sup>H NMR** (400 MHz, CDCl<sub>3</sub>): δ 7.37 (d, *J* = 8.0 Hz, 2H), 7.23 (d, *J* = 7.8 Hz, 2H), 7.18 (t, *J* = 7.9 Hz, 2H), 6.76 (t, *J* = 7.3 Hz, 1H), 6.64 (d, *J* = 8.5 Hz, 2H), 4.71 (s, 1H), 4.48 (dd, *J* = 8.9, 4.5 Hz, 1H), 3.05 (dd, *J* = 13.6, 4.6 Hz, 1H), 2.87 (dd, *J* = 13.6, 9.0 Hz, 1H), 2.42 (s, 3H). **<sup>13</sup>C NMR** (100 MHz, CDCl<sub>3</sub>): δ 147.65, 139.87, 137.18, 129.65, 129.20, 126.37, 117.89, 113.99, 56.18, 42.55, 21.26. **HRMS** (ESI): calcd for C<sub>16</sub>H<sub>17</sub>D<sub>3</sub>NS [M + H]<sup>+</sup> 261.1505, found 261.1507.

### N-(1-(4-(tert-butyl)phenyl)-2-((methyl-d3)thio)ethyl)aniline

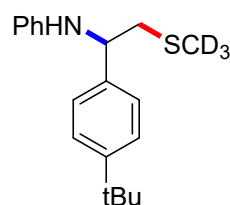

**5c**

Following the general procedure, using (petroleum ether : EtOAc = 9 : 1) as the eluant afforded a yellow liquid (53.1 mg, 88% yield). **<sup>1</sup>H NMR** (400 MHz, CDCl<sub>3</sub>): δ 7.48-7.41 (m, 4H), 7.21 (t, *J* = 7.9 Hz, 2H), 6.78 (t, *J* = 7.6 Hz, 1H), 6.67 (d, *J* = 7.9 Hz, 2H), 4.72 (s, 1H), 4.52 (dd, *J* = 9.0, 4.6 Hz, 1H), 3.08 (dd, *J* = 13.6, 4.5 Hz, 1H), 2.90 (dd, *J* = 13.6, 9.0 Hz, 1H), 1.42 (s, 9H). **<sup>13</sup>C NMR** (100 MHz, CDCl<sub>3</sub>): δ 150.40, 147.73, 139.78, 129.22, 126.12, 125.84, 117.87, 113.98, 56.15, 42.48, 34.63, 31.56. **HRMS** (ESI): calcd for C<sub>19</sub>H<sub>23</sub>D<sub>3</sub>NS [M + H]<sup>+</sup> 303.1974, found 303.1972.

### N-2-((methyl-d3)thio)cyclohexyl)aniline



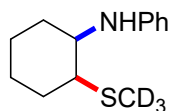

### 5d

Following the general procedure, using (petroleum ether : EtOAc = 9 : 1) as the eluant afforded a yellow liquid (34.9 mg, 78% yield). **<sup>1</sup>H NMR** (400 MHz, CDCl<sub>3</sub>): δ 7.25-7.21 (m, 2H), 6.77-6.69 (m, 3H), 4.12 (s, 1H), 3.21 (td, *J* = 9.5, 3.8 Hz, 1H), 2.64 (td, *J* = 10.1, 3.8 Hz, 1H), 2.43-2.36 (m, 1H), 2.21 (dp, *J* = 13.0, 3.6 Hz, 1H), 1.88-1.76 (m, 1H), 1.65 (dtd, *J* = 14.3, 10.9, 3.7 Hz, 1H), 1.53-1.36 (m, 1H), 1.32-1.23 (m, 1H). **<sup>13</sup>C NMR** (100 MHz, CDCl<sub>3</sub>): δ 147.76, 129.35, 117.47, 113.43, 55.33, 49.73, 33.17, 32.24, 25.75, 24.33. **HRMS** (ESI): calcd for C<sub>13</sub>H<sub>17</sub>D<sub>3</sub>NS [M + H]<sup>+</sup> 225.1505, found 225.1496.

### 2-((methyl-d3)thio)-N-phenyl-1,2,3,4-tetrahydronaphthalen-1-amine

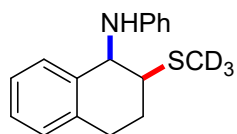

### 5e

Following the general procedure, using (petroleum ether : EtOAc = 9 : 1) as the eluant afforded a yellow liquid (48.9 mg, 90% yield). **<sup>1</sup>H NMR** (400 MHz, CDCl<sub>3</sub>): δ 7.39 (d, *J* = 7.2 Hz, 1H), 7.29-7.18 (m, 5H), 6.79 (t, *J* = 7.3 Hz, 1H), 6.72 (d, *J* = 7.8 Hz, 2H), 4.59 (s, 1H), 4.11 (s, 1H), 3.38 (dt, *J* = 5.4, 3.4 Hz, 1H), 3.11 (ddd, *J* = 16.8, 10.8, 5.7 Hz, 1H), 2.83 (dt, *J* = 17.0, 4.8 Hz, 1H), 2.31 (dddd, *J* = 13.9, 10.7, 5.5, 3.1 Hz, 1H), 2.04 (ddd, *J* = 13.9, 7.4, 3.2 Hz, 1H). **<sup>13</sup>C NMR** (100 MHz, CDCl<sub>3</sub>): δ 146.96, 136.43, 135.78, 130.52, 129.58, 128.95, 127.62, 126.51, 117.68, 112.84, 55.72, 44.93, 25.32, 23.42. **HRMS** (ESI): calcd for C<sub>17</sub>H<sub>15</sub>D<sub>3</sub>NS [M - H]<sup>+</sup> 271.1348, found 271.1344.

### 2-((methyl-d3)thio)-N-phenyl-2,3-dihydro-1H-inden-1-amine

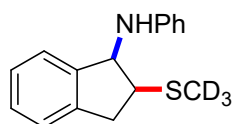

**5f**

Following the general procedure, using (petroleum ether : EtOAc = 9 : 1) as the eluant afforded a yellow liquid (45.9 mg, 89% yield). <sup>1</sup>H NMR (400 MHz, CDCl<sub>3</sub>): δ 7.42-7.27 (m, 6H), 6.85-6.82 (m, 3H), 4.97 (d, *J* = 5.2 Hz, 1H), 4.01 (s, 1H), 3.55-3.42 (m, 2H), 3.05 (dd, *J* = 15.8, 5.7 Hz, 1H). <sup>13</sup>C NMR (100 MHz, CDCl<sub>3</sub>): δ 147.51, 143.43, 141.42, 129.57, 128.54, 127.32, 124.95, 124.71, 117.95, 113.43, 65.44, 51.39, 37.89. HRMS (ESI): calcd for C<sub>16</sub>H<sub>15</sub>D<sub>3</sub>NS [M + H]<sup>+</sup> 259.1348, found 259.1348.

**4-(3-oxobutyl)phenyl 4-(2-((methyl-d3)thio)-1-(phenylamino)ethyl)benzoate**

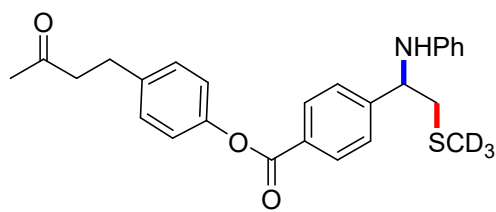

**5g**

Following the general procedure, using (petroleum ether : EtOAc = 9 : 1) as the eluant afforded a yellow solid (72.4 mg, 83% yield), Mp = 40-41 °C. <sup>1</sup>H NMR (400 MHz, CDCl<sub>3</sub>): δ 8.18 (d, *J* = 8.4 Hz, 2H), 7.56 (d, *J* = 8.4 Hz, 2H), 7.29 (d, *J* = 7.9 Hz, 2H), 7.18 (d, *J* = 8.5 Hz, 2H), 6.83 (dd, *J* = 17.6, 10.9 Hz, 1H), 5.95 (d, *J* = 17.6 Hz, 1H), 5.47 (d, *J* = 10.9 Hz, 1H), 3.52 (dd, *J* = 8.4, 6.5 Hz, 1H), 3.28 (dd, *J* = 14.1, 8.4 Hz, 1H), 2.94 (dd, *J* = 14.1, 6.6 Hz, 1H), 2.30 (s, 3H). <sup>13</sup>C NMR (100 MHz, CDCl<sub>3</sub>): δ 203.09, 165.04, 149.70, 142.68, 136.15, 135.99, 130.56, 130.14, 128.63, 126.36, 121.81, 117.06, 54.33, 34.65, 27.58. HRMS (ESI): calcd for C<sub>26</sub>H<sub>25</sub>D<sub>3</sub>NO<sub>3</sub>S [M + H]<sup>+</sup> 437.1978, found 437.1981.

**2,5,6,8-tetramethyl-2-(4,8,12-trimethyltridecyl)chroman-7-yl 4-(2-((methyl-d3)thio)-1-(phenylamino)ethyl)benzoate**

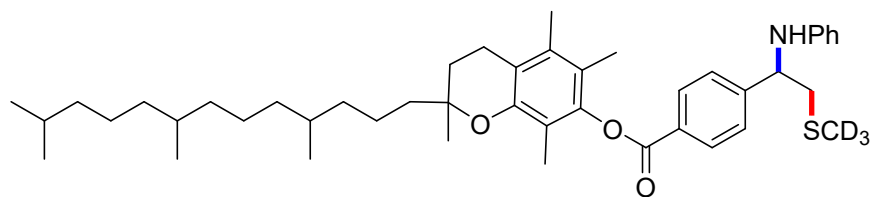

**5h**

Following the general procedure, using (petroleum ether : EtOAc = 9 : 1) as the eluant afforded a yellow liquid (113.7 mg, 81% yield). **<sup>1</sup>H NMR** (400 MHz, CDCl<sub>3</sub>): δ 8.33 (d, *J* = 8.2 Hz, 2H), 7.66 (d, *J* = 8.2 Hz, 2H), 7.21 (t, *J* = 7.9 Hz, 2H), 6.81 (t, *J* = 7.3 Hz, 1H), 6.65 (d, *J* = 8.0 Hz, 2H), 4.84 (s, 1H), 4.61 (dd, *J* = 9.1, 4.4 Hz, 1H), 3.11 (dd, *J* = 13.6, 4.4 Hz, 1H), 2.89 (dd, *J* = 13.6, 9.1 Hz, 1H), 2.72 (t, *J* = 6.8 Hz, 2H), 2.24-2.12 (m, 9H), 1.90 (dp, *J* = 20.0, 6.8 Hz, 2H), 1.69-1.15 (m, 26H), 0.99-0.95 (m, 10H). **<sup>13</sup>C NMR** (100 MHz, CDCl<sub>3</sub>): δ 165.03, 149.61, 149.04, 147.21, 140.77, 130.93, 129.31, 129.07, 127.05, 126.76, 125.28, 123.25, 118.34, 117.60, 115.19, 114.03, 75.19, 56.32, 42.26, 40.56, 39.75, 39.53, 37.60, 37.44, 32.95, 31.41, 31.19, 28.13, 24.96, 24.60, 24.35, 23.84, 22.90, 22.81, 21.18, 20.79, 19.93, 19.84, 13.25, 12.40, 12.02. **HRMS** (ESI): calcd for C<sub>45</sub>H<sub>62</sub>D<sub>3</sub>NO<sub>3</sub>SNa [M + Na]<sup>+</sup> 725.4771, found 725.4778.

**2-methyl-5-(2-((methyl-d3)thio)-1-phenylethyl)thiophene**

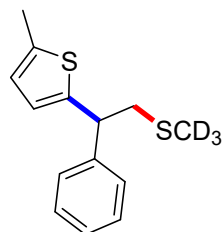

**6a**

Following the general procedure, using (petroleum ether : EtOAc = 9 : 1) as the eluant afforded a yellow liquid (36.1 mg, 72% yield). **<sup>1</sup>H NMR** (400 MHz, CDCl<sub>3</sub>): δ 7.39-7.27 (m, 5H), 6.70 (d, *J* = 3.4 Hz, 1H), 6.61 (dt, *J* = 3.3, 1.3 Hz, 1H), 4.36 (t, *J* = 7.7 Hz, 1H), 3.25 (dd, *J* = 13.0, 7.4 Hz, 1H), 3.16 (dd, *J* = 12.9, 8.0 Hz, 1H), 2.46 (s, 3H). **<sup>13</sup>C NMR** (100 MHz, CDCl<sub>3</sub>): δ 145.17, 143.25, 138.57, 128.64, 127.80, 127.07, 124.67, 124.25, 47.21, 41.57, 15.35. **HRMS** (ESI): calcd for C<sub>14</sub>H<sub>12</sub>D<sub>3</sub>S<sub>2</sub> [M - H]<sup>+</sup> 250.0803, found 250.0794.

**4-methyl-2-(2-((methyl-d3)thio)-1-phenylethyl)thiophene**

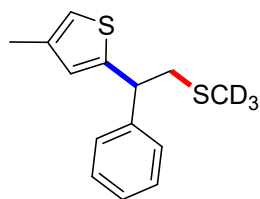

**6b**

Following the general procedure, using (petroleum ether : EtOAc = 9 : 1) as the eluant afforded a yellow liquid (35.6 mg, 71% yield). <sup>1</sup>H NMR (400 MHz, CDCl<sub>3</sub>): δ 7.37 (d, *J* = 4.3 Hz, 4H), 7.30-7.27 (m, 1H), 7.16 (d, *J* = 5.0 Hz, 1H), 6.85 (d, *J* = 5.1 Hz, 1H), 4.51 (t, *J* = 7.7 Hz, 1H), 3.23 (dd, *J* = 7.7, 2.4 Hz, 2H), 2.22 (s, 3H). <sup>13</sup>C NMR (100 MHz, CDCl<sub>3</sub>): δ 142.93, 140.52, 133.63, 130.18, 128.67, 127.86, 126.92, 122.12, 45.15, 41.85, 14.13. HRMS (ESI): calcd for C<sub>14</sub>H<sub>13</sub>D<sub>3</sub>NaS<sub>2</sub> [M + Na]<sup>+</sup> 274.0779, found 274.0775.

**5-(1-(4-(tert-butyl)phenyl)-2-((methyl-d3)thio)ethyl)-2,2'-bithiophene**

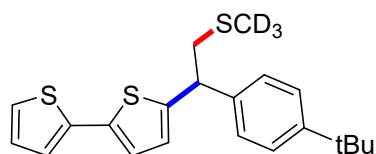

**6c**

Following the general procedure, using (petroleum ether : EtOAc = 9 : 1) as the eluant afforded a yellow liquid (56.2 mg, 75% yield). <sup>1</sup>H NMR (400 MHz, CDCl<sub>3</sub>): δ 7.41 (d, *J* = 8.3 Hz, 2H), 7.30 (d, *J* = 8.4 Hz, 2H), 7.20 (d, *J* = 5.1 Hz, 1H), 7.14 (d, *J* = 4.4 Hz, 1H), 7.05-7.01 (m, 2H), 6.84 (d, *J* = 3.6 Hz, 1H), 4.39 (t, *J* = 7.6 Hz, 1H), 3.30-3.17 (m, 2H), 1.37 (s, 9H). <sup>13</sup>C NMR (100 MHz, CDCl<sub>3</sub>): δ 150.08, 147.01, 139.78, 136.12, 127.78, 127.52, 127.36, 125.68, 125.28, 124.14, 123.43, 123.30, 46.84, 41.59, 34.56, 31.46. HRMS (ESI): calcd for C<sub>21</sub>H<sub>21</sub>D<sub>3</sub>NaS<sub>3</sub> [M + Na]<sup>+</sup> 398.1126, found 398.1124.

**(3S,8S,9S,10R,13R,14S,17R)-10,13-dimethyl-17-(-6-methylheptan-2-yl)-2,3,4,7,8,9,10,11,12,13,14,15,16,17-tetradecahydro-1H-cyclopenta[a]phenanthren-3-yl 4-((R)-2-((methyl-d3)thio)-1-(5-methylthiophen-2-yl)ethyl)benzoate**

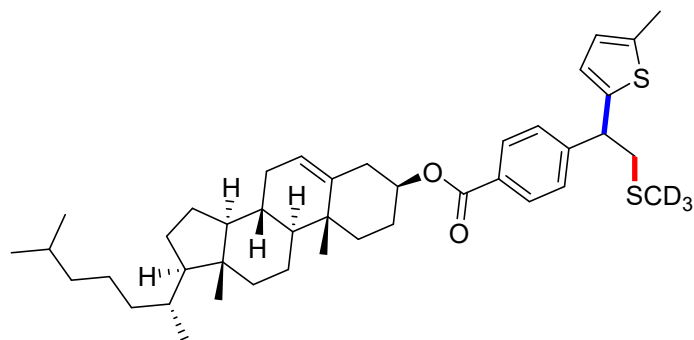

**6d**

Following the general procedure, using (petroleum ether : EtOAc = 9 : 1) as the eluant afforded a yellow liquid (98.1 mg, 74% yield). **<sup>1</sup>H NMR** (400 MHz, CDCl<sub>3</sub>): δ 8.04 (d, *J* = 8.1 Hz, 2H), 7.40 (d, *J* = 8.2 Hz, 2H), 6.67 (d, *J* = 3.4 Hz, 1H), 6.60 (d, *J* = 3.3 Hz, 1H), 5.46-5.44 (m, 1H), 4.88 (dq, *J* = 11.9, 3.9 Hz, 1H), 4.40 (t, *J* = 7.7 Hz, 1H), 3.25 (dd, *J* = 13.0, 7.0 Hz, 1H), 3.15 (dd, *J* = 13.0, 8.4 Hz, 1H), 2.49-2.45 (m, 4H), 2.09-2.089 (m, 39H), 0.73 (s, 3H). **<sup>13</sup>C NMR** (100 MHz, CDCl<sub>3</sub>): δ 165.80, 148.12, 144.20, 139.72, 138.93, 129.99, 129.66, 127.82, 124.75, 124.45, 122.85, 74.56, 56.77, 56.20, 50.11, 47.06, 42.39, 41.13, 39.81, 39.59, 38.29, 37.10, 36.72, 36.26, 35.87, 32.00, 31.95, 28.31, 28.09, 27.96, 24.37, 23.90, 22.90, 22.64, 21.12, 19.45, 18.79, 15.36, 11.94. **HRMS** (ESI): calcd for C<sub>42</sub>H<sub>57</sub>D<sub>3</sub>O<sub>2</sub>NaS<sub>2</sub> [M + Na]<sup>+</sup> 686.4121, found 686.4122.

**4-(3-oxobutyl)phenyl 4-(2-((methyl-d3)thio)-1-(5-methylthiophen-2-yl)ethyl)benzoate**

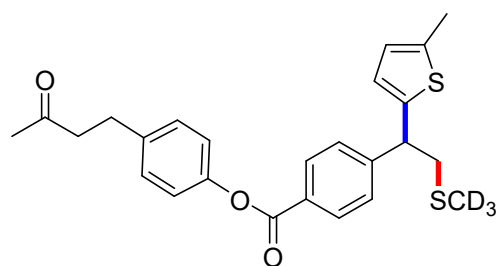

**6e**

Following the general procedure, using (petroleum ether : EtOAc = 9 : 1) as the eluant afforded a yellow liquid (59.1 mg, 67% yield). **<sup>1</sup>H NMR** (400 MHz, CDCl<sub>3</sub>): δ 8.19 (d, *J* = 8.2 Hz, 2H), 7.47 (d, *J* = 8.3 Hz, 2H), 7.27 (d, *J* = 8.3 Hz, 2H), 7.13 (d, *J* = 8.4 Hz, 2H), 6.70 (d, *J* = 3.3 Hz, 1H), 6.62 (d, *J* = 3.3 Hz, 1H), 4.44 (t, *J* = 7.7 Hz, 1H), 3.28 (dd, *J* = 13.0, 7.0 Hz, 1H), 3.18 (dd, *J* = 13.1, 8.4 Hz, 1H), 2.97-2.94 (m, 2H), 2.83-2.80 (m, 2H), 2.46 (s, 3H), 2.19 (s, 3H). **<sup>13</sup>C NMR** (100 MHz, CDCl<sub>3</sub>): δ 207.84, 149.28, 149.11, 143.97, 139.08, 138.71, 130.62, 129.42, 128.48, 128.36, 128.13, 124.81, 124.53, 121.73, 47.08, 45.20, 41.07, 30.19, 29.15, 15.36. **HRMS** (ESI):

calcd for  $C_{25}H_{23}D_3O_3NaS_2$   $[M + Na]^+$  464.1409, found 464.1409.

# $^1\text{H}$ , $^{13}\text{C}$ and $^{19}\text{F}$ NMR spectra of products

wg1485.1.1.1r

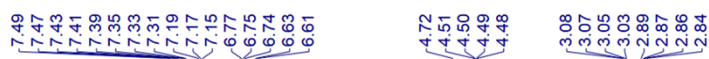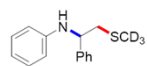

4a

$^1\text{H}$  NMR (400 MHz,  $\text{CDCl}_3$ )

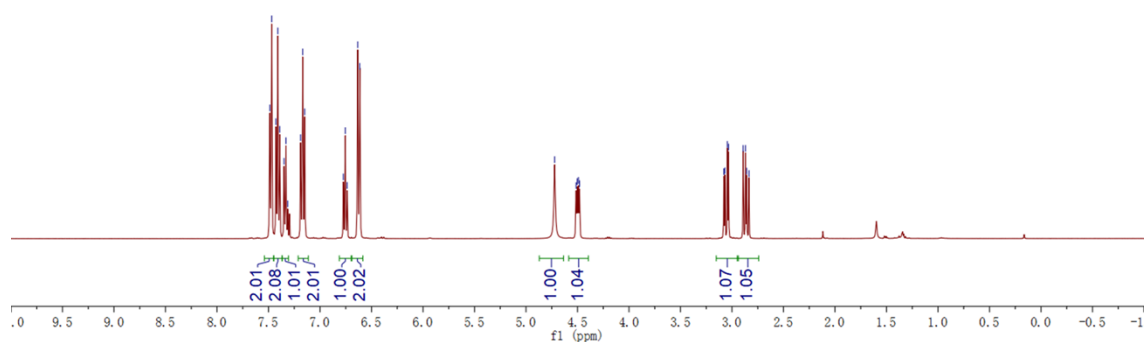

pdata/1

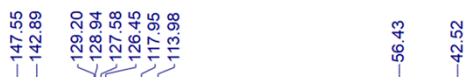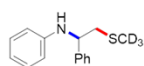

4a

$^{13}\text{C}$  NMR (100 MHz,  $\text{CDCl}_3$ )

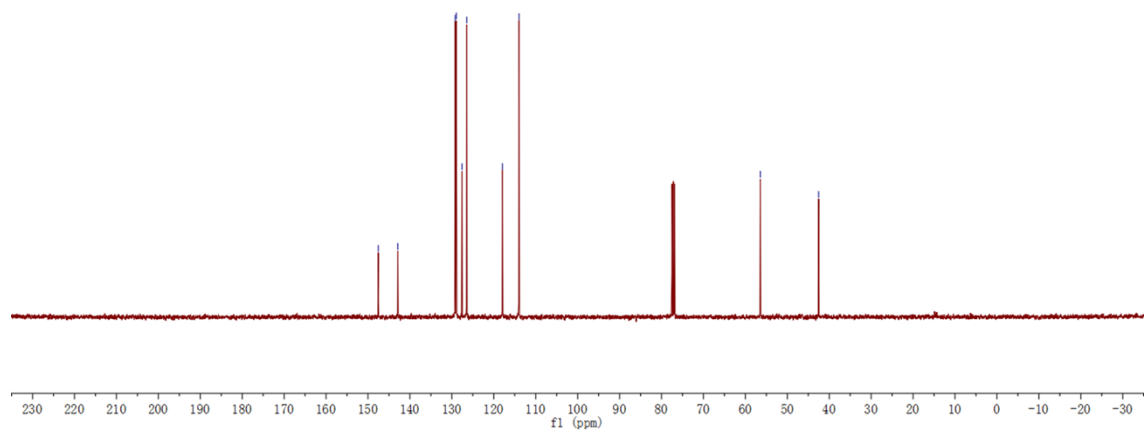

wg1469.1.1.1r

7.49  
7.48  
7.43  
7.41  
7.39  
7.35  
7.33  
7.31  
6.99  
6.82  
6.80  
6.30  
6.28  
4.60  
4.51  
4.50  
4.49  
4.48  
3.12  
3.11  
3.09  
3.07  
2.92  
2.89  
2.86  
2.37  
2.27

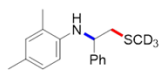

4b

<sup>1</sup>H NMR (400 MHz, CDCl<sub>3</sub>)

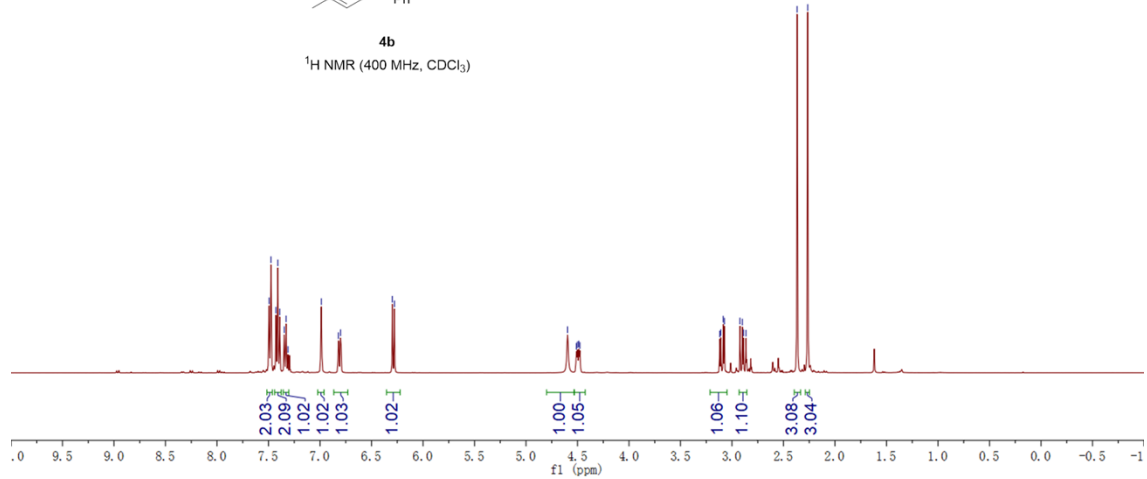

pdata/1

143.27  
143.24  
131.01  
128.94  
127.49  
127.20  
126.66  
126.40  
123.15  
111.75  
56.45  
42.81  
20.45  
17.75

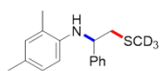

4b

<sup>13</sup>C NMR (100 MHz, CDCl<sub>3</sub>)

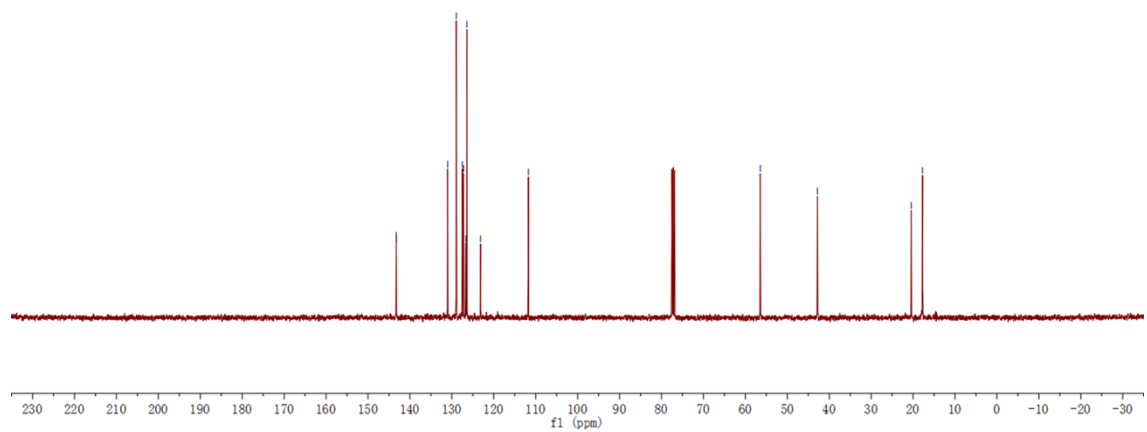



wg1493.1.1.1r

7.51  
7.49  
7.44  
7.42  
7.40  
7.35  
7.34  
7.32  
7.06  
6.60  
6.57  
4.64  
4.48  
4.47  
4.46  
4.44  
3.07  
3.05  
3.03  
3.02  
2.88  
2.86  
2.85  
2.83  
1.26  
1.24

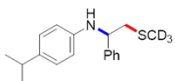

4c

<sup>1</sup>H NMR (400 MHz, CDCl<sub>3</sub>)

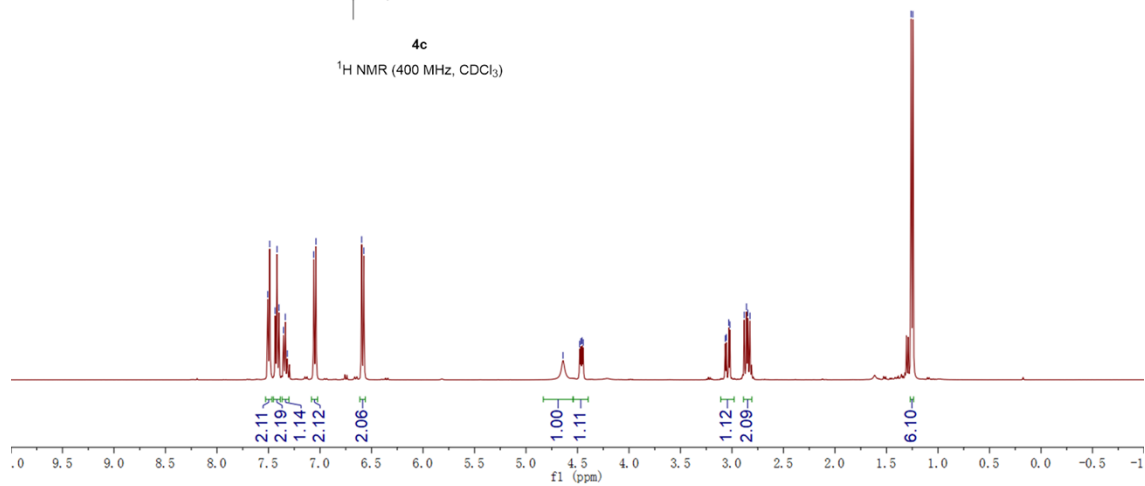

pdata/1

145.64  
143.24  
138.39  
128.93  
127.53  
127.06  
126.50  
114.01  
56.73  
42.65  
33.23  
24.32

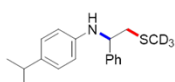

4c

<sup>13</sup>C NMR (100 MHz, CDCl<sub>3</sub>)

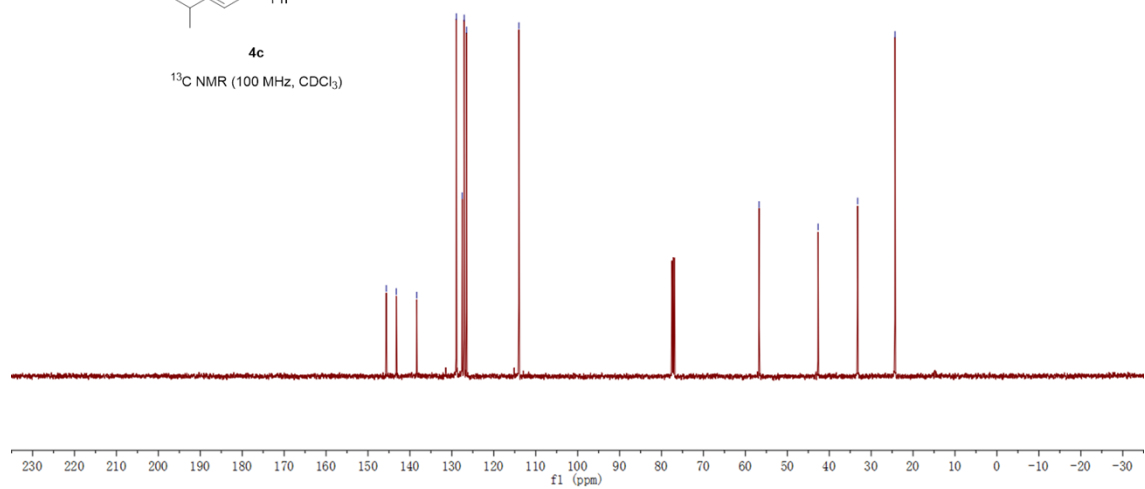

wg1482.1.1.1r

7.49  
7.47  
7.44  
7.42  
7.40  
7.37  
7.35  
7.33  
6.90  
6.88  
6.86  
6.57  
6.56  
6.55  
6.54  
4.62  
4.45  
4.44  
4.43  
4.42  
3.08  
3.07  
3.04  
3.03  
2.88  
2.85  
2.84  
2.82

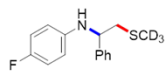

4d

<sup>1</sup>H NMR (400 MHz, CDCl<sub>3</sub>)

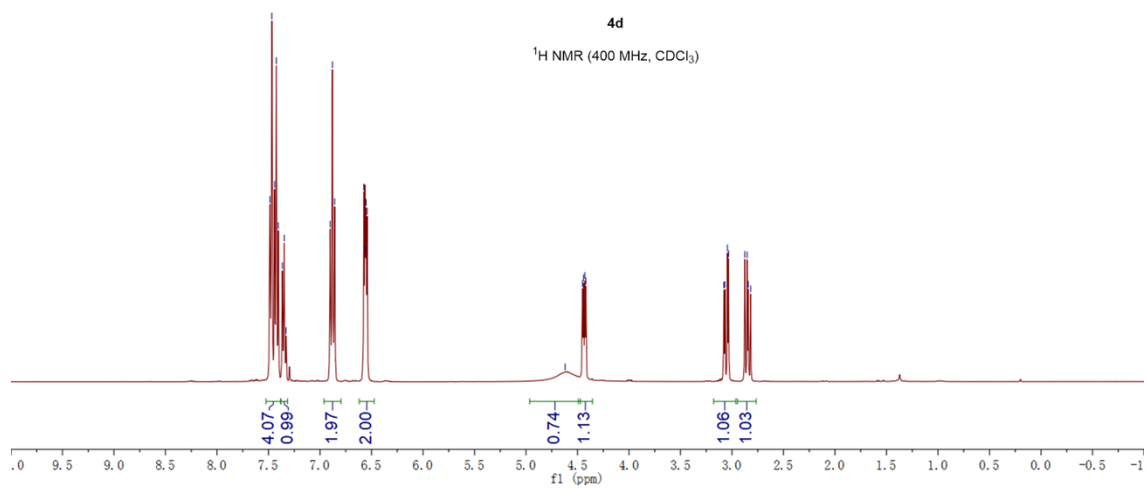

pdata/1

157.31  
154.97  
143.95  
143.93  
142.74  
129.02  
127.70  
126.47  
115.74  
115.52  
114.89  
114.81  
56.97  
42.59

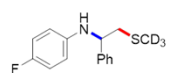

4d

<sup>13</sup>C NMR (100 MHz, CDCl<sub>3</sub>)

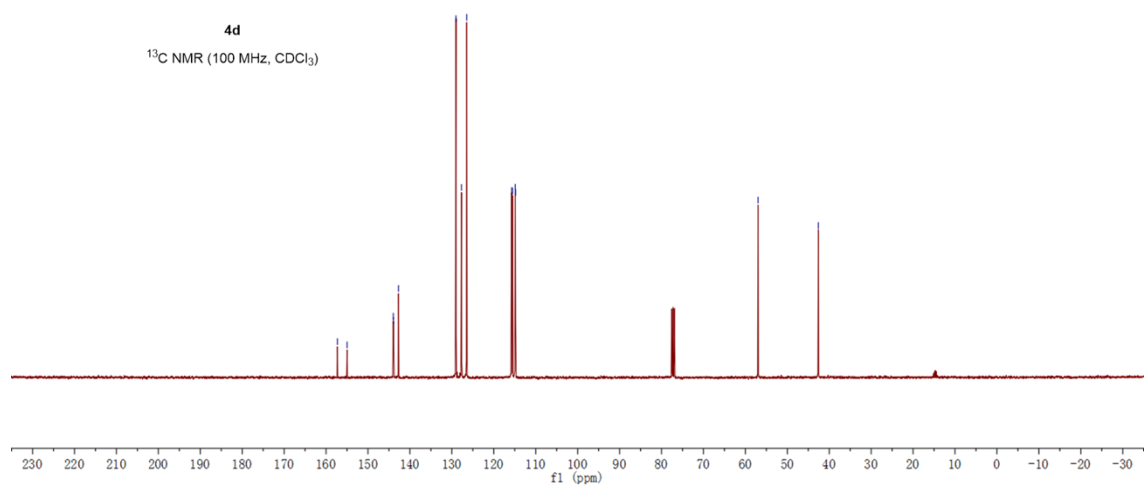

pdata/1

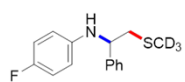

**4d**  
<sup>19</sup>F NMR (375 MHz, CDCl<sub>3</sub>)

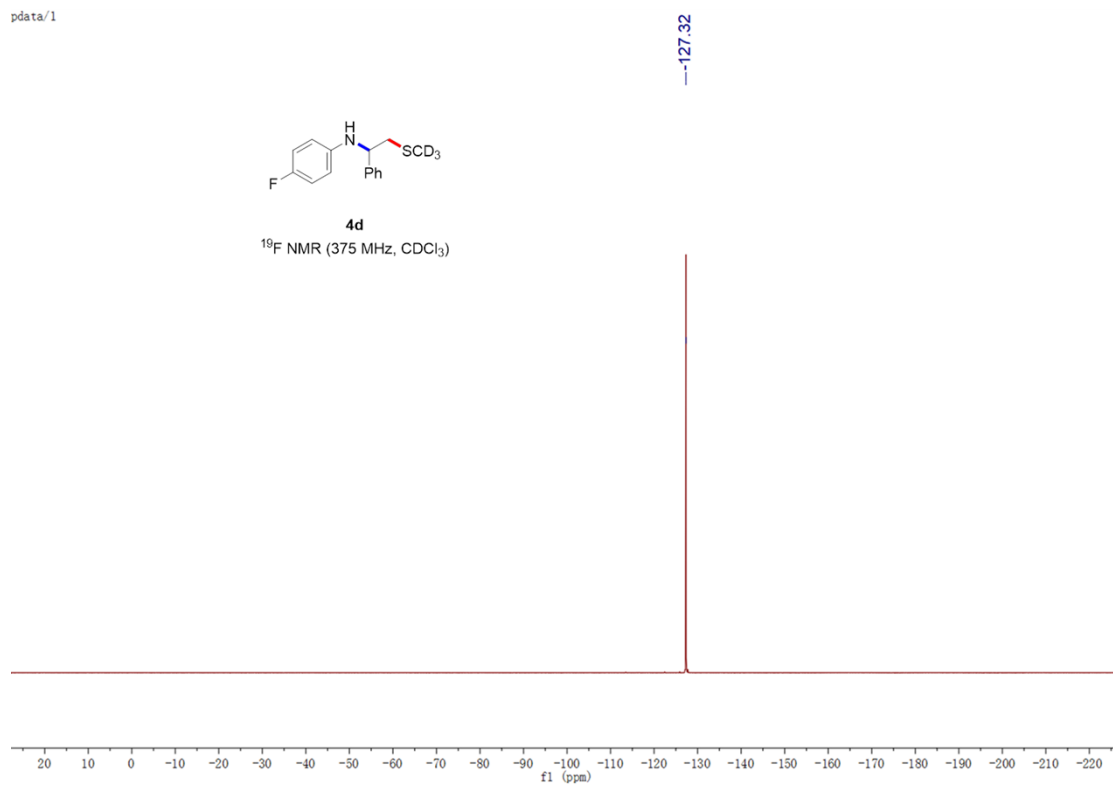

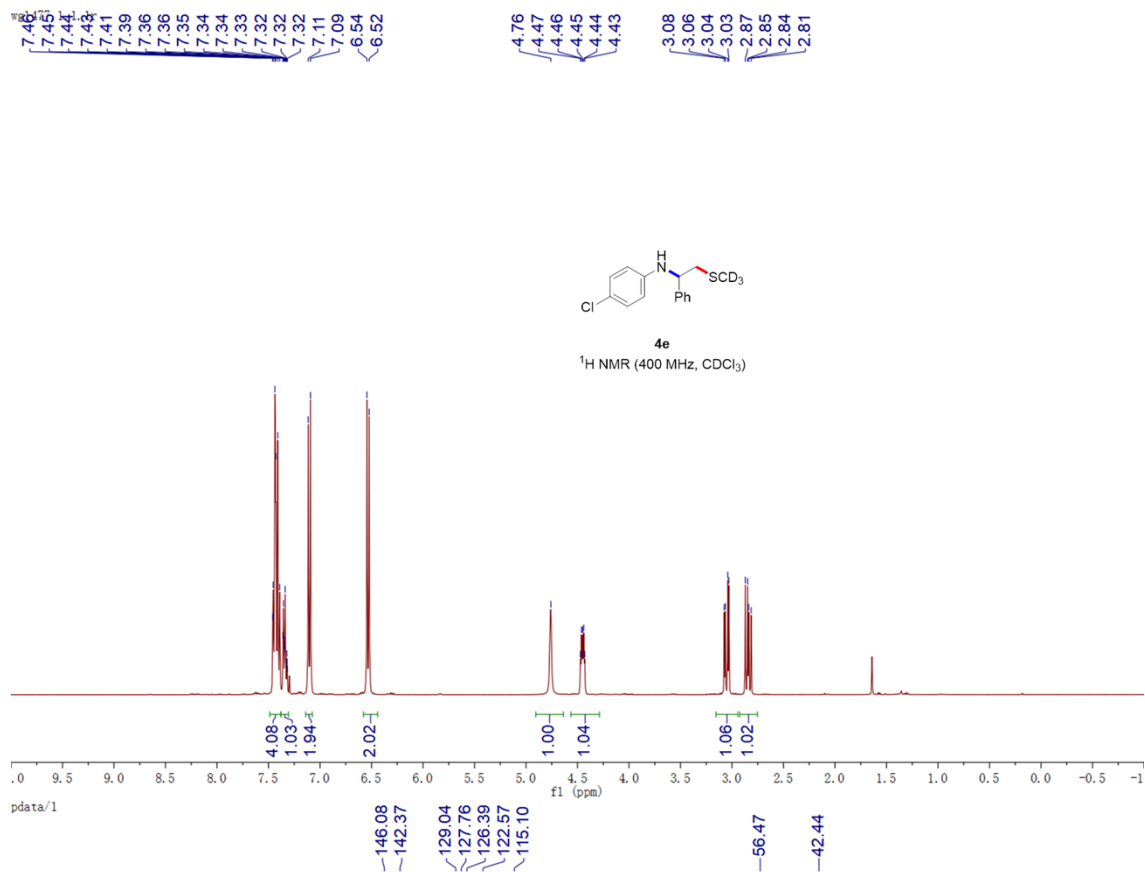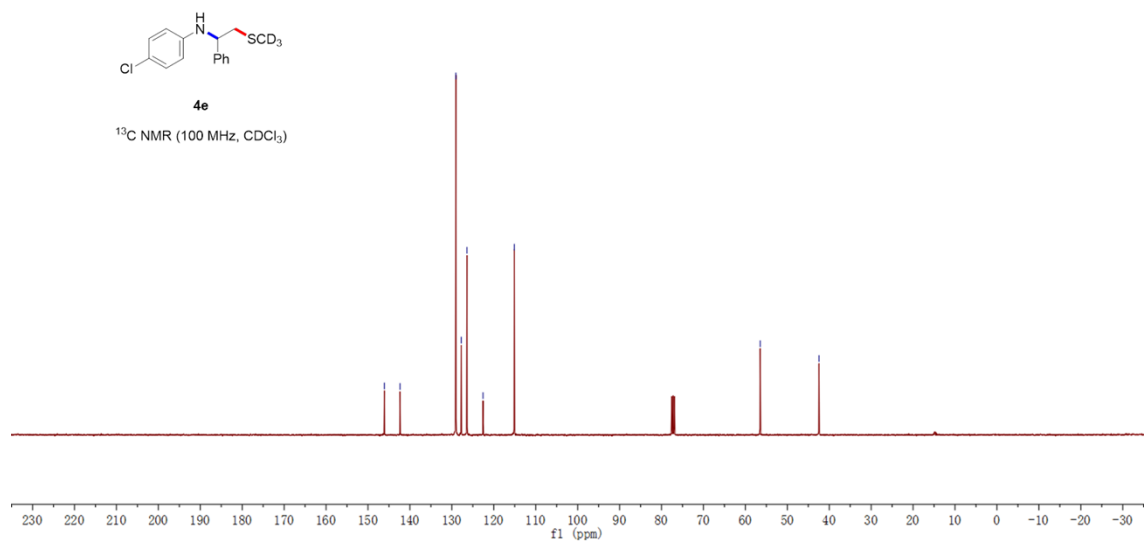

wg1468.1.1.1r

7.45  
7.42  
7.40  
7.39  
7.35  
7.33  
7.32  
7.24  
7.22  
6.49  
6.47  
-4.77  
-4.45  
-4.43  
3.07  
3.06  
3.04  
3.03  
2.87  
2.84  
2.83  
2.81

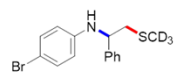

4f

<sup>1</sup>H NMR (400 MHz, CDCl<sub>3</sub>)

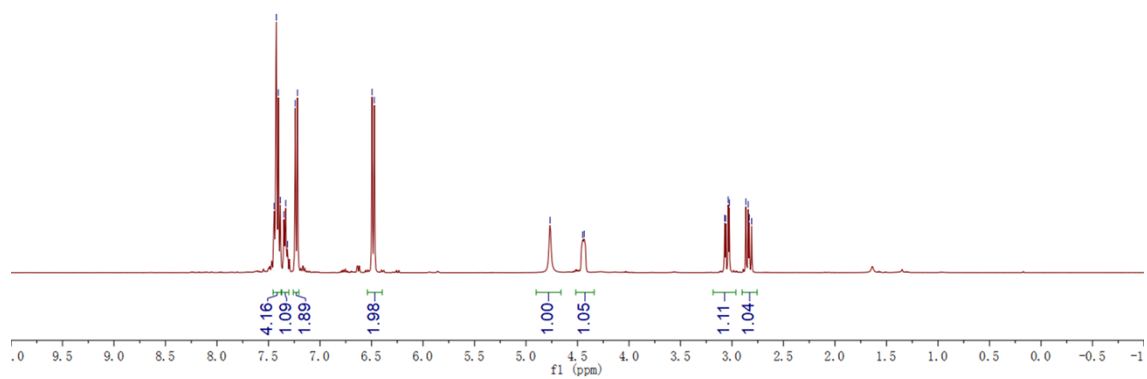

pdata/1

-146.48  
-142.28  
-131.91  
-129.05  
-127.77  
-126.38  
-115.60  
-109.69  
-56.37  
-42.42

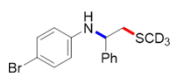

4f

<sup>13</sup>C NMR (100 MHz, CDCl<sub>3</sub>)

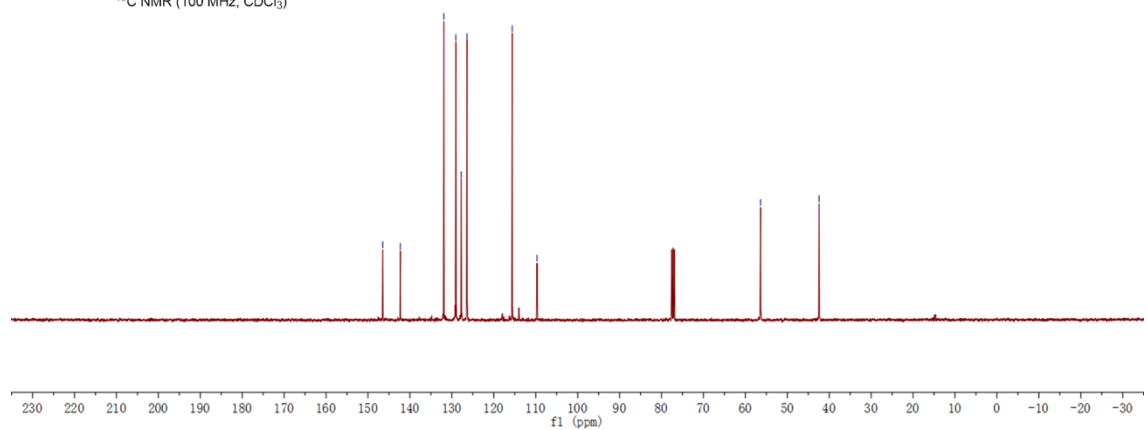

wg1466.1.1.1r

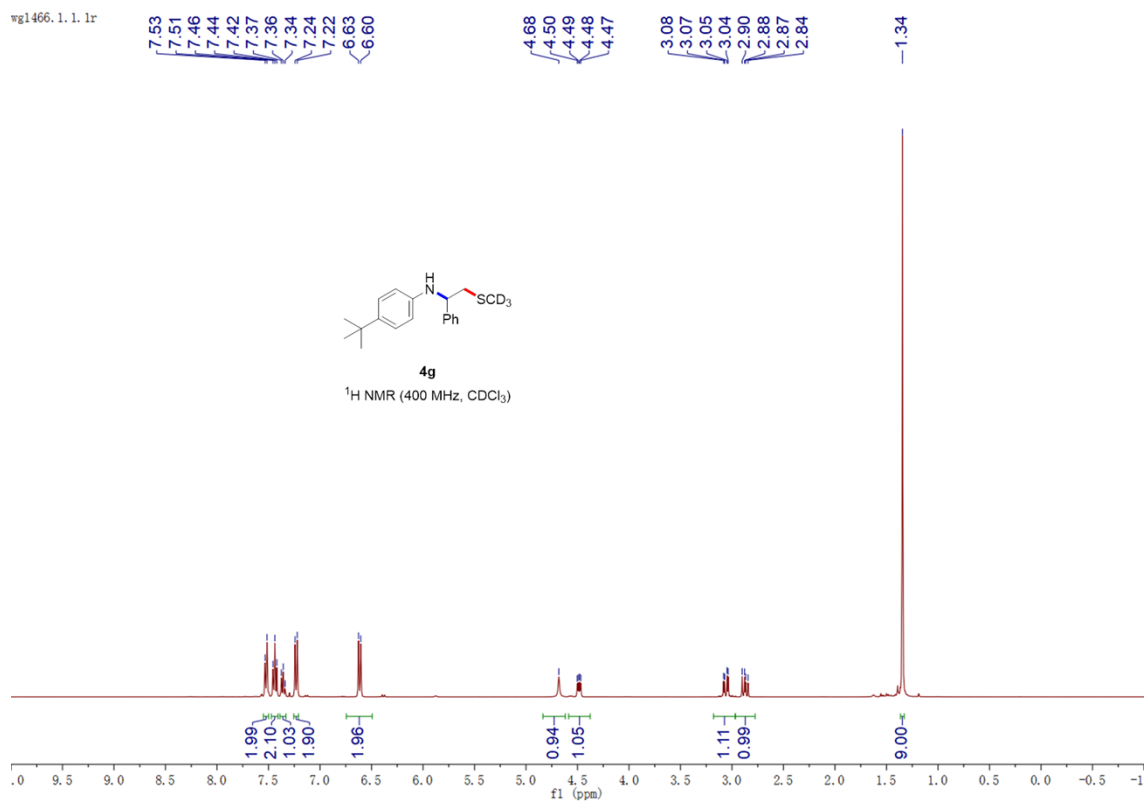

wg1466.2.1.1r

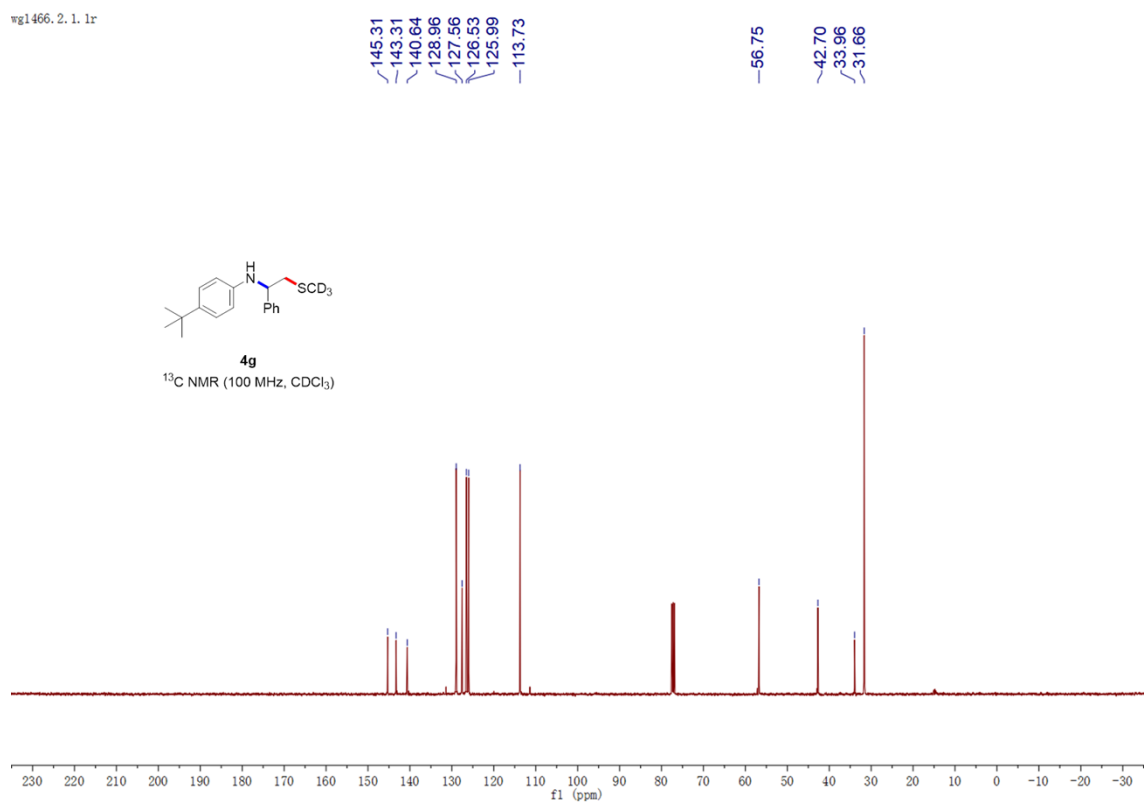

wg1481.1.1.1r

7.45  
7.44  
7.43  
7.42  
7.40  
7.38  
7.37  
7.36  
7.35  
6.63  
6.61

5.05  
4.55  
4.54  
4.53

3.10  
3.09  
3.07  
3.06  
2.90  
2.88  
2.87  
2.84

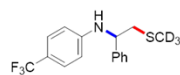

4h

<sup>1</sup>H NMR (400 MHz, CDCl<sub>3</sub>)

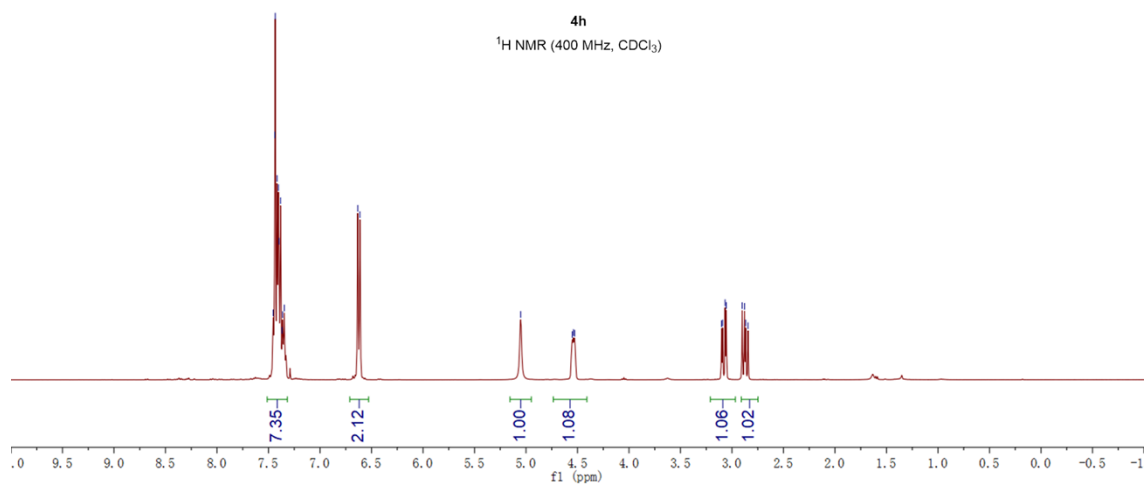

pdata/1

149.95  
141.91  
129.11  
127.89  
126.61  
126.57  
126.53  
126.49  
126.38  
126.30  
123.69  
121.00  
119.92  
119.59  
119.27  
118.95  
113.16

56.05  
42.29

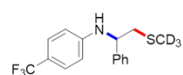

4h

<sup>13</sup>C NMR (100 MHz, CDCl<sub>3</sub>)

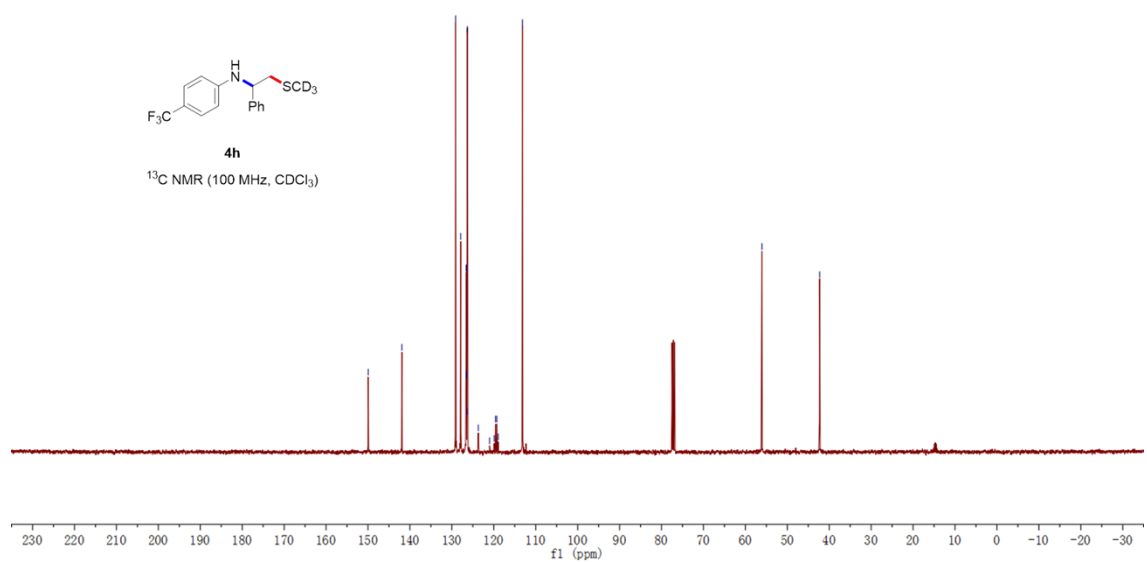

pdata/1

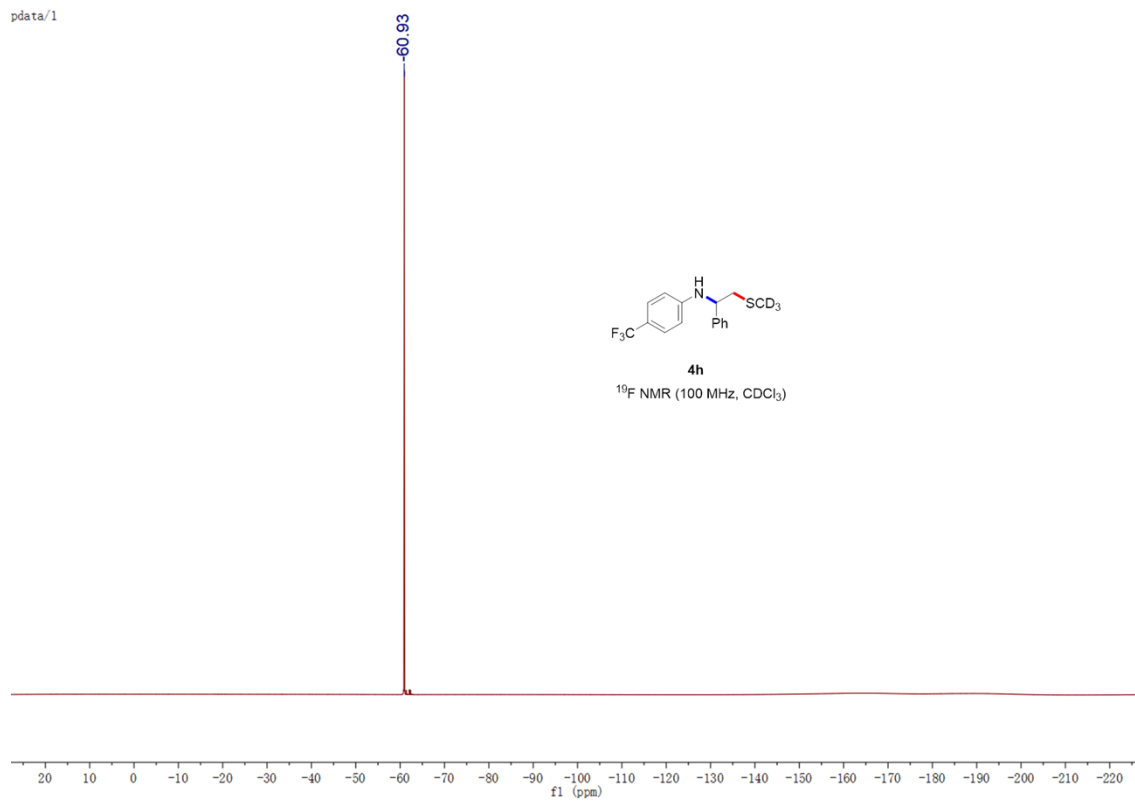

wg1470.1.1.l.r

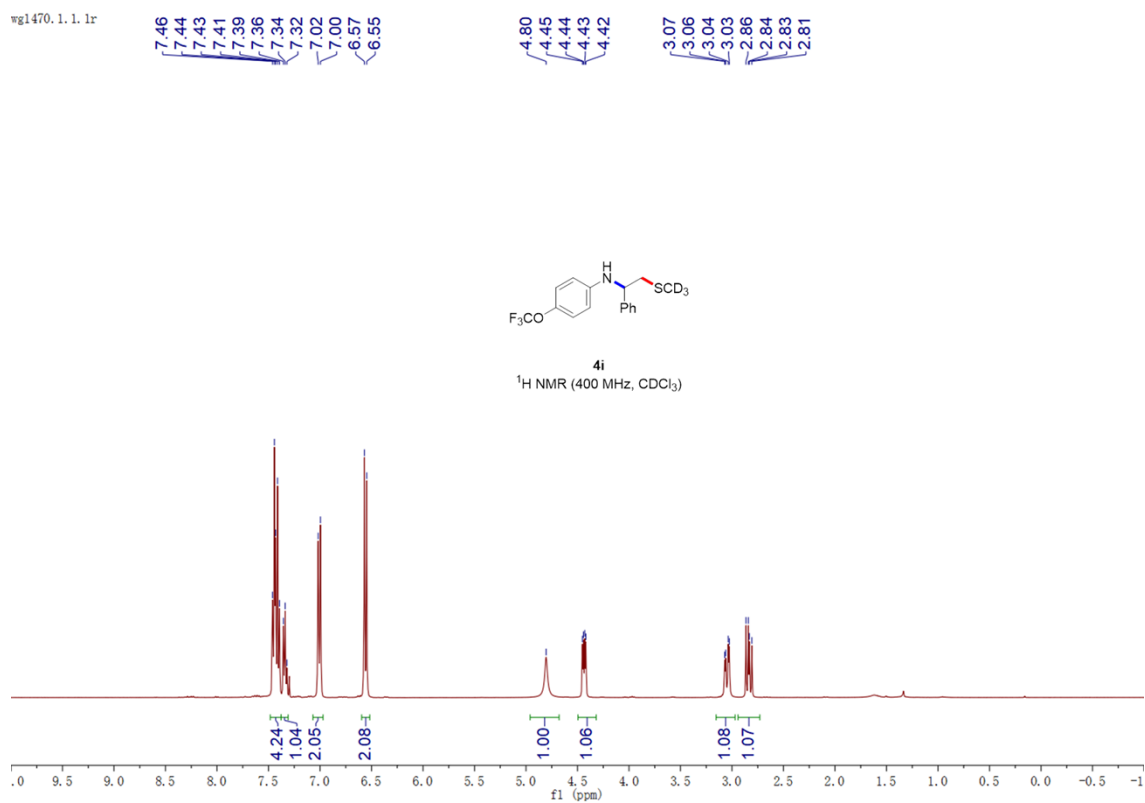



pdata/1

146.32  
142.37  
140.89  
129.05  
127.78  
126.35  
122.30  
122.04  
119.50  
114.25

-56.58

-42.48

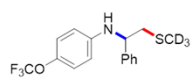

**4i**

<sup>13</sup>C NMR (100 MHz, CDCl<sub>3</sub>)

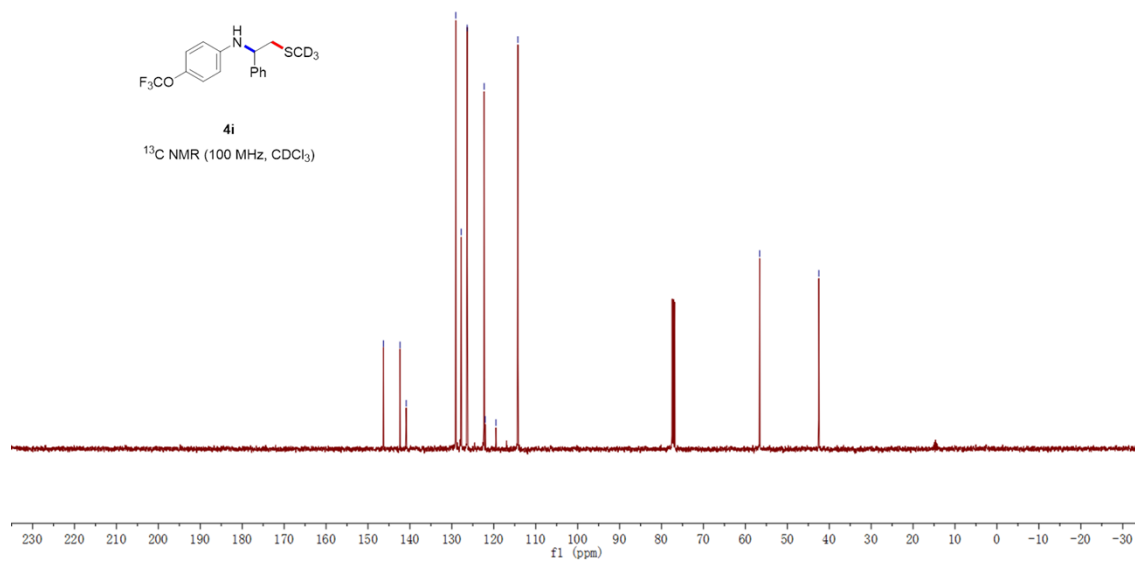

pdata/1

-56.35

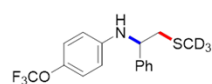

**4i**

<sup>19</sup>F NMR (375 MHz, CDCl<sub>3</sub>)

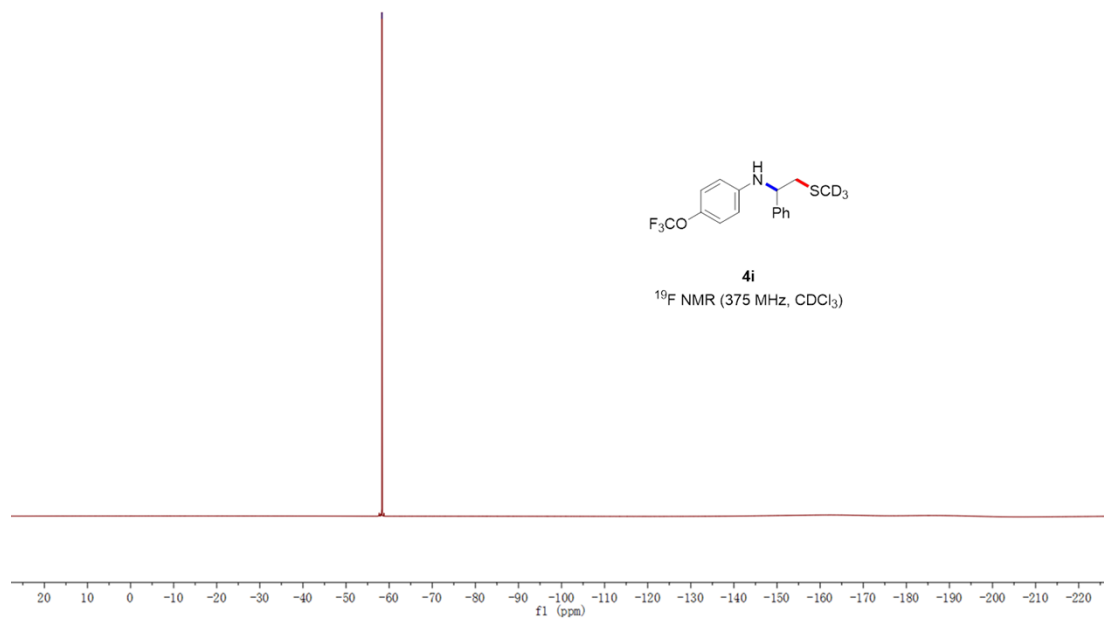

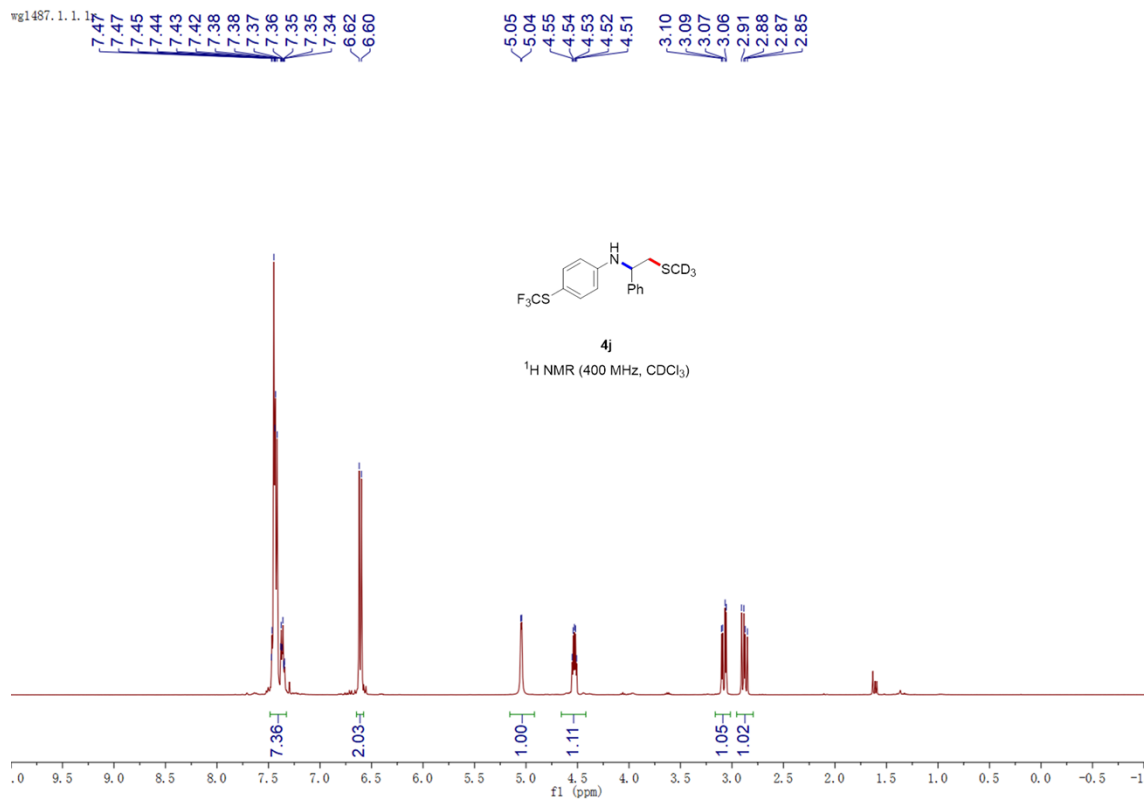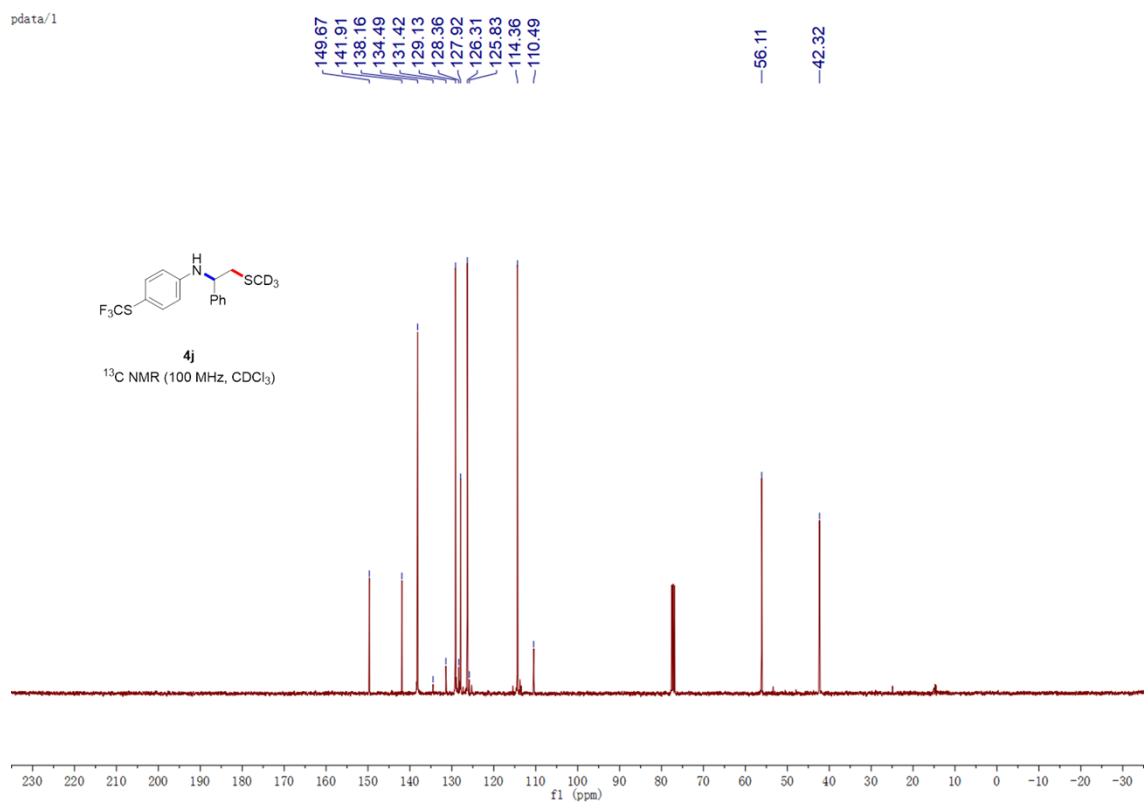

pdata/1

-44.28

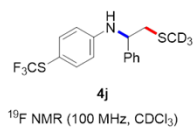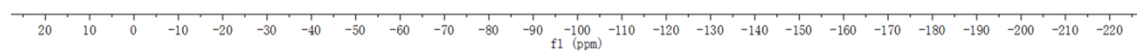

wg1486.1.1

|      |      |      |
|------|------|------|
| 7.40 | 5.25 | 3.08 |
| 7.38 | 5.23 | 3.07 |
| 7.38 | 4.55 | 3.04 |
| 7.37 | 4.54 | 3.03 |
| 7.36 | 4.53 | 2.89 |
| 7.36 | 4.52 | 2.87 |
| 7.35 | 4.51 | 2.86 |
| 7.34 |      | 2.84 |
| 7.33 |      |      |
| 7.32 |      |      |
| 7.32 |      |      |
| 7.31 |      |      |
| 7.30 |      |      |
| 6.56 |      |      |
| 6.54 |      |      |

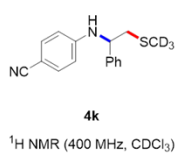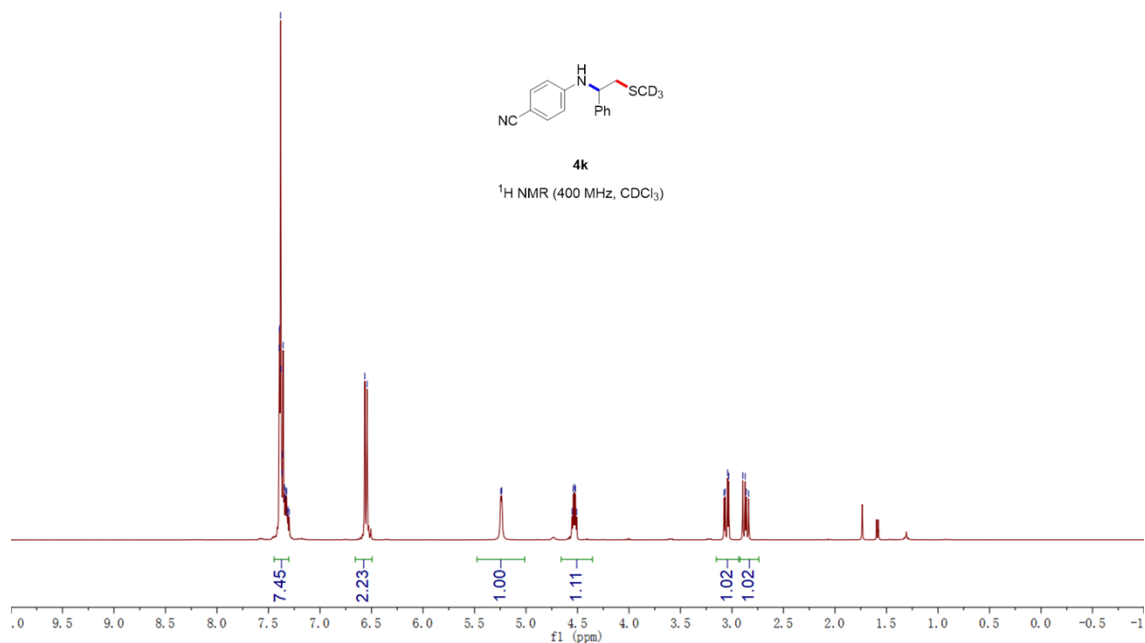

pdata/1

150.56  
141.28  
133.61  
129.15  
128.02  
126.21  
120.41  
113.53  
99.49  
55.89  
42.11

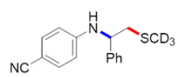

**4k**  
<sup>13</sup>C NMR (100 MHz, CDCl<sub>3</sub>)

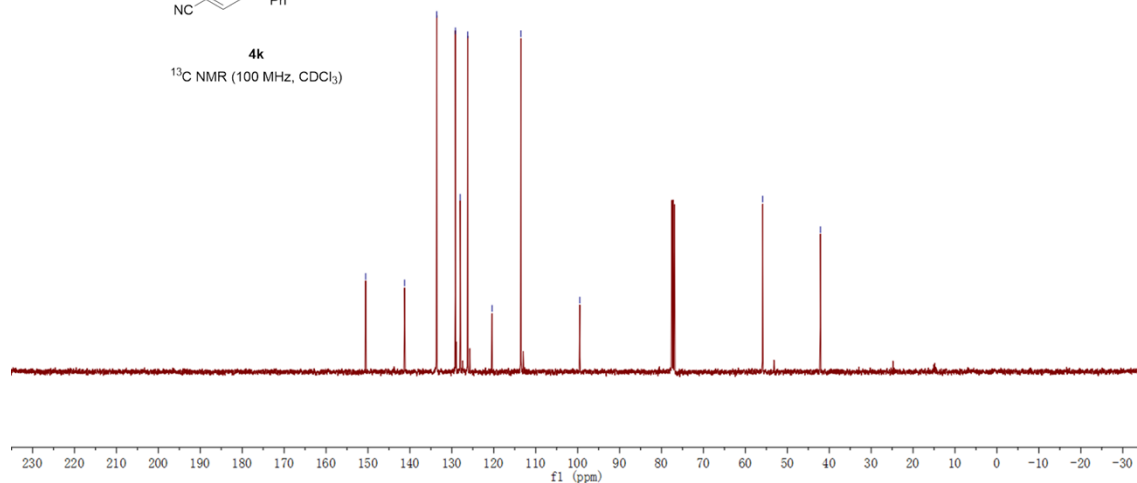

wg1488-1.1.1.1r

7.44  
7.42  
7.40  
7.38  
7.36  
7.32  
7.30  
7.28  
6.17  
5.74  
4.47  
4.45  
4.44  
3.98  
3.77  
3.55  
3.06  
3.05  
3.03  
3.01  
2.98  
2.96  
2.95  
2.92

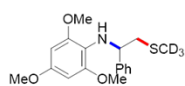

**4l**  
<sup>1</sup>H NMR (400 MHz, CDCl<sub>3</sub>)

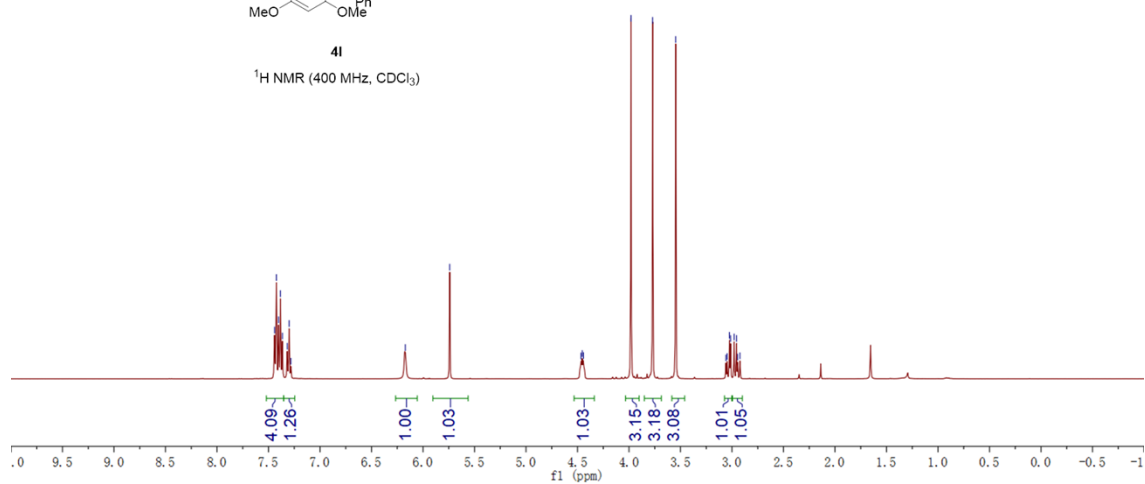

pdata/1

155.84  
154.73  
145.78  
143.04  
133.89  
128.98  
127.66  
126.35  
-104.64  
-92.31  
61.60  
61.16  
57.82  
55.47  
-42.65

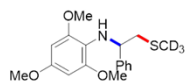

4l

<sup>13</sup>C NMR (100 MHz, CDCl<sub>3</sub>)

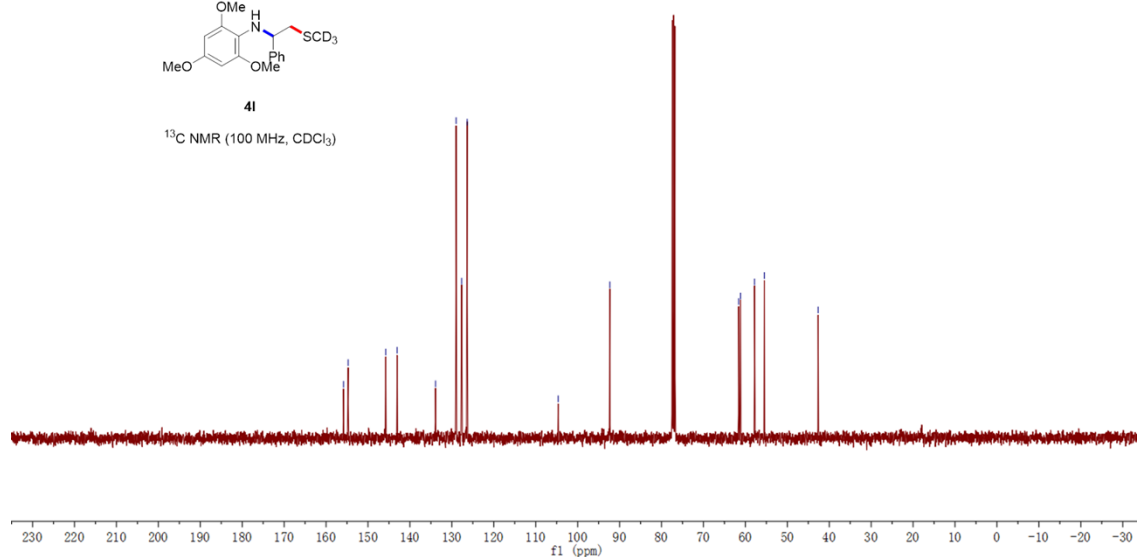

7.65  
7.66  
7.60  
7.59  
7.58  
7.39  
7.37  
7.36  
7.34  
7.32  
7.31  
7.30  
7.29  
7.28  
6.55  
6.53  
5.28  
5.27  
5.06  
4.56  
4.55  
4.54  
4.53  
4.51  
3.04  
3.03  
3.01  
2.90  
2.88  
2.86  
2.84

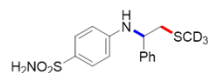

4m

<sup>1</sup>H NMR (400 MHz, CDCl<sub>3</sub>)

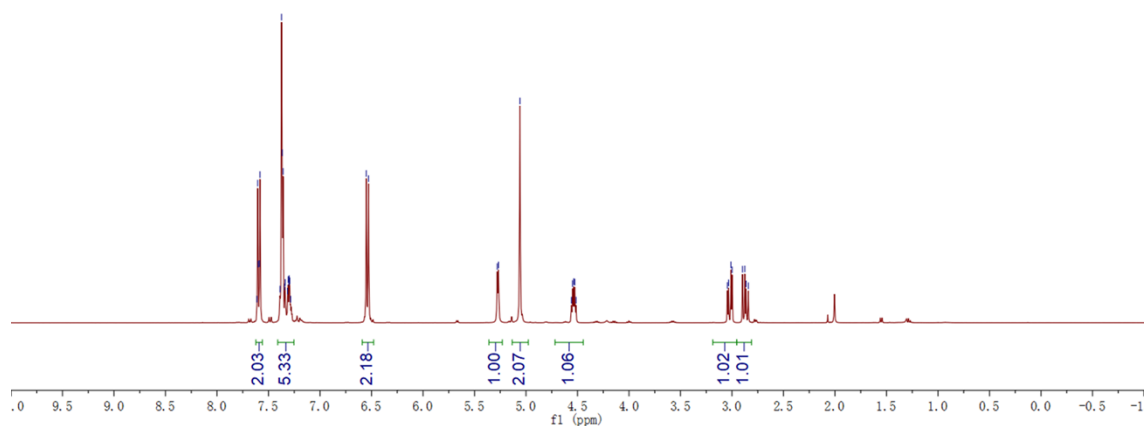

pdata/1

150.74  
141.46  
129.47  
129.09  
128.29  
127.93  
126.34  
112.98  
56.02  
42.04

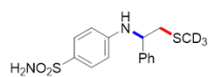

4m

<sup>13</sup>C NMR (100 MHz, CDCl<sub>3</sub>)

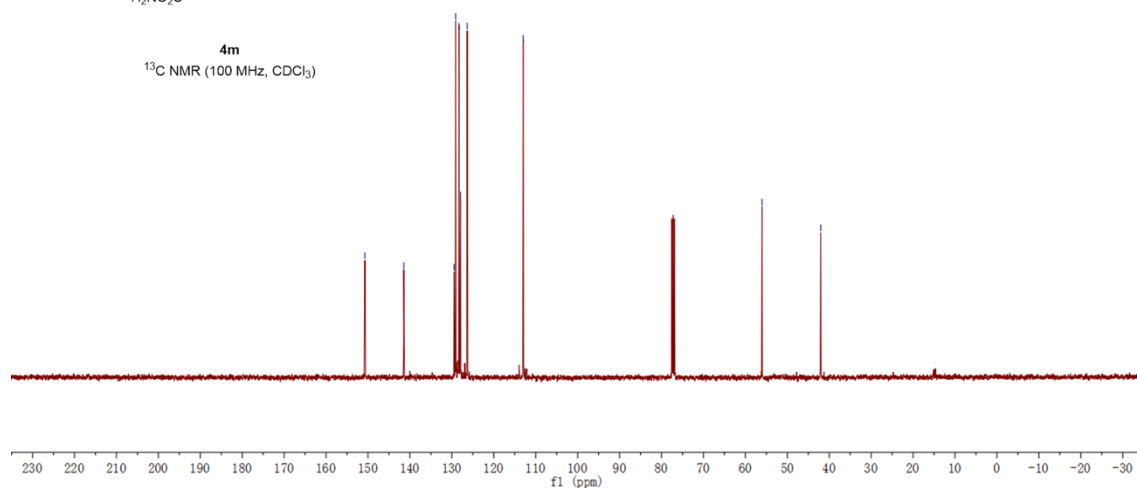

7.56  
7.51  
7.47  
7.46  
7.45  
7.45  
7.44  
7.44  
7.43  
7.43  
7.42  
7.41  
7.40  
7.39  
7.37  
6.77  
4.93  
4.92  
4.91  
4.90  
3.10  
3.09  
3.07  
3.06  
3.05  
3.03  
3.02  
3.00

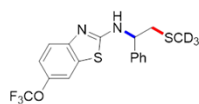

4n

<sup>1</sup>H NMR (400 MHz, CDCl<sub>3</sub>)

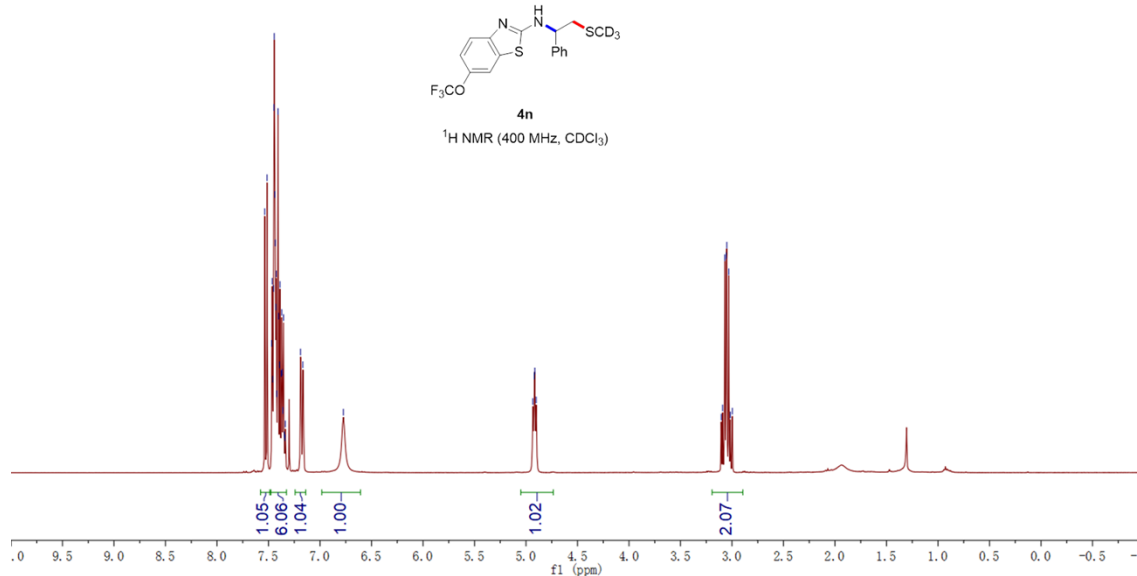

pdata/1

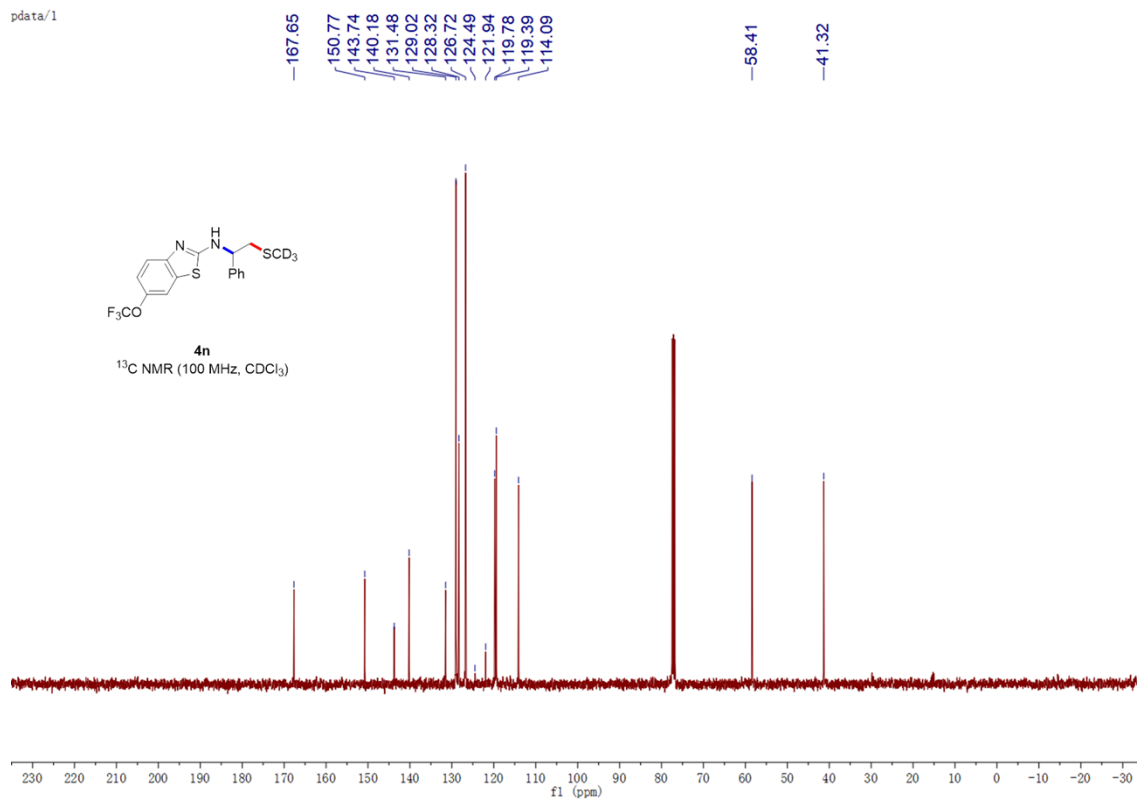

pdata/1

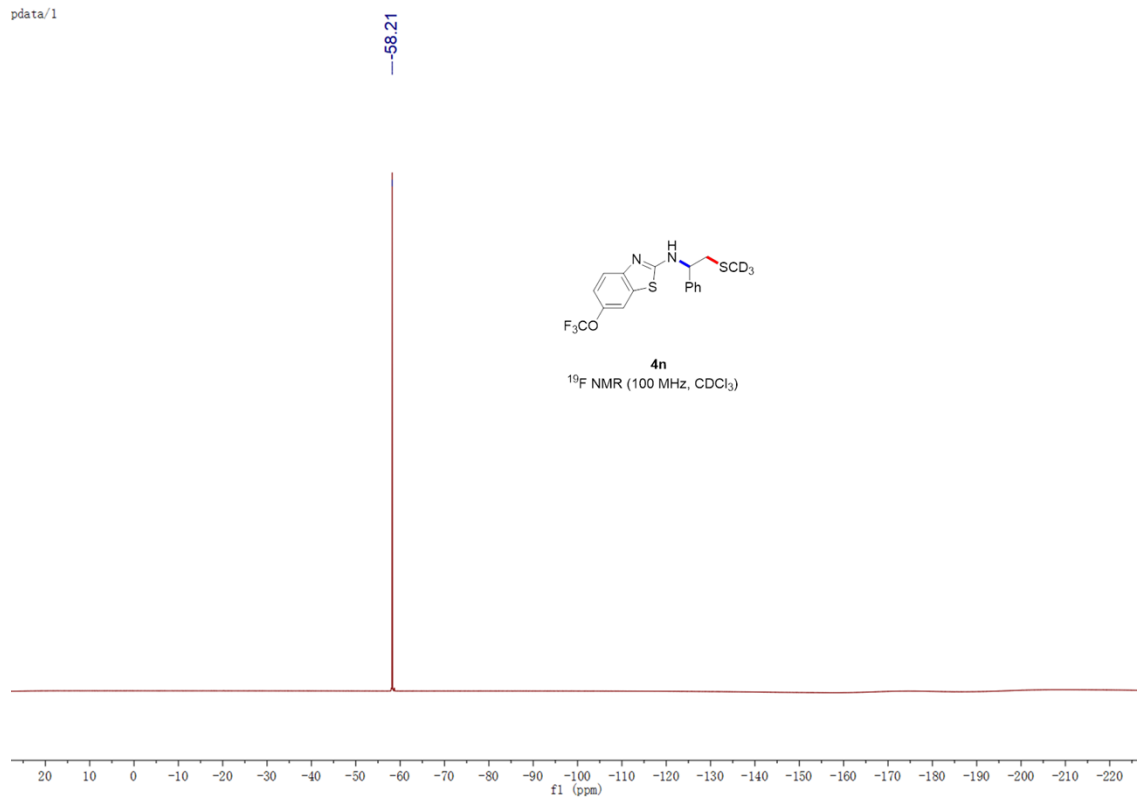

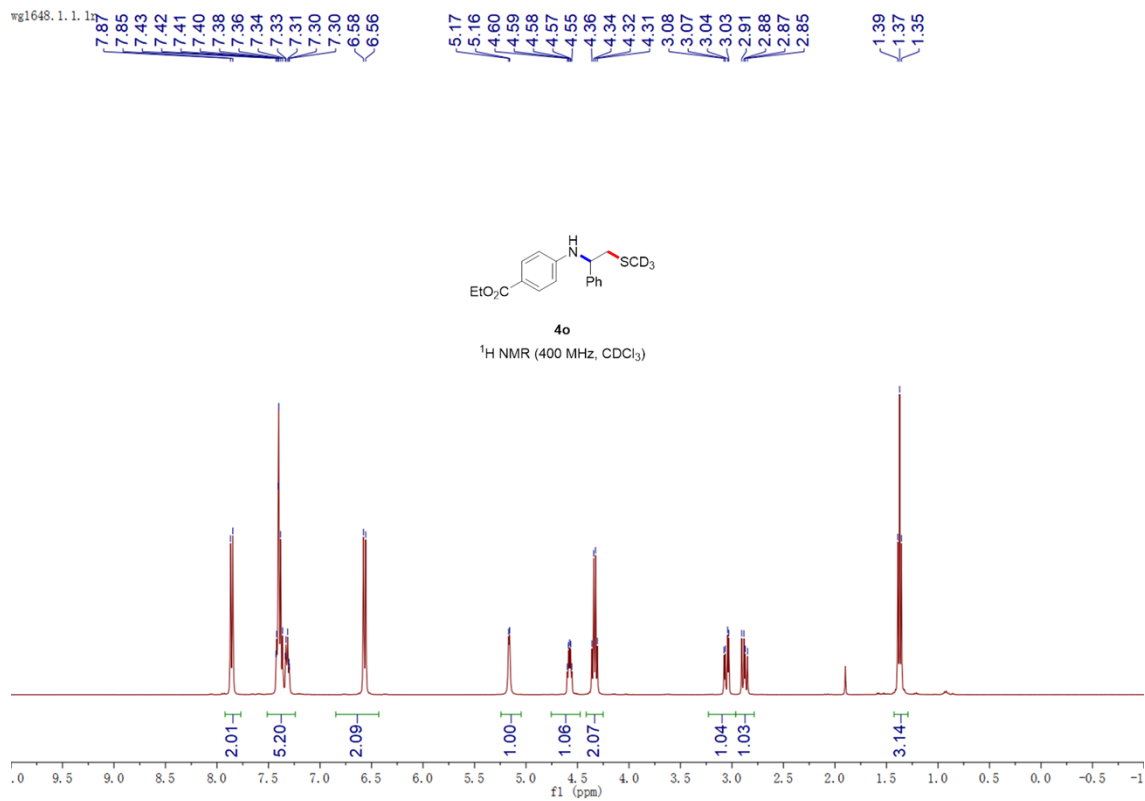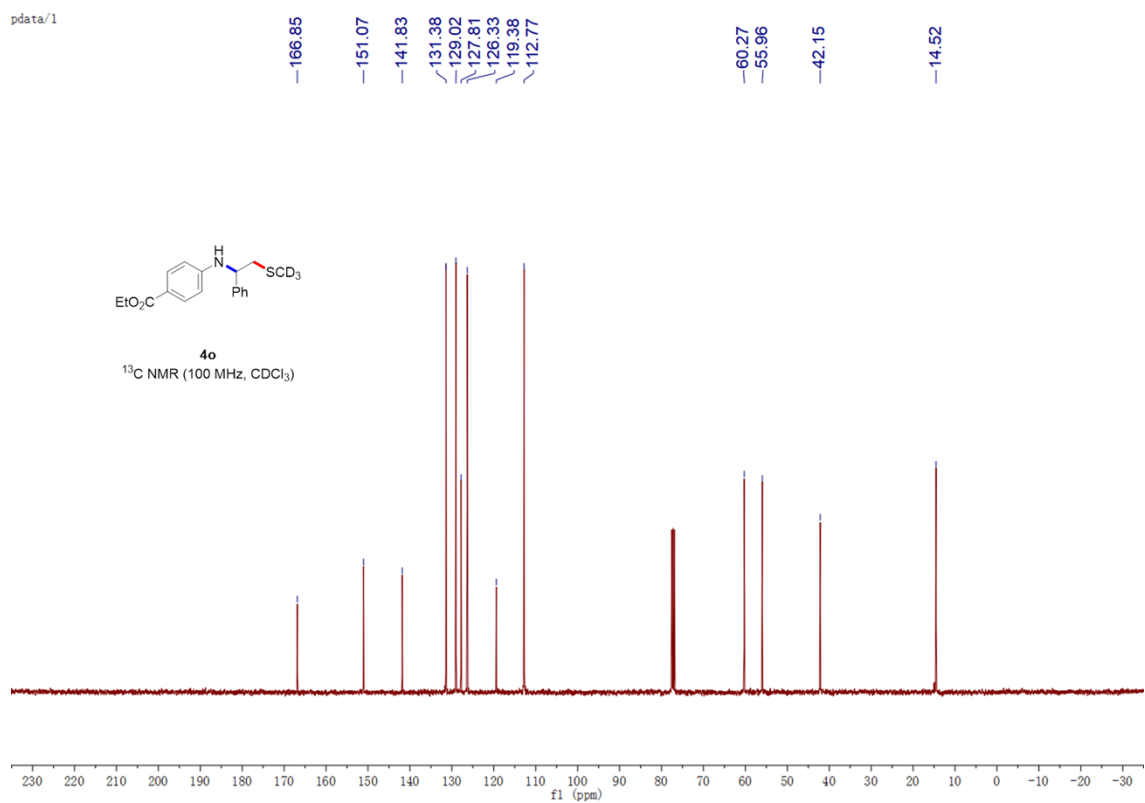



wg1508.1.1.1r

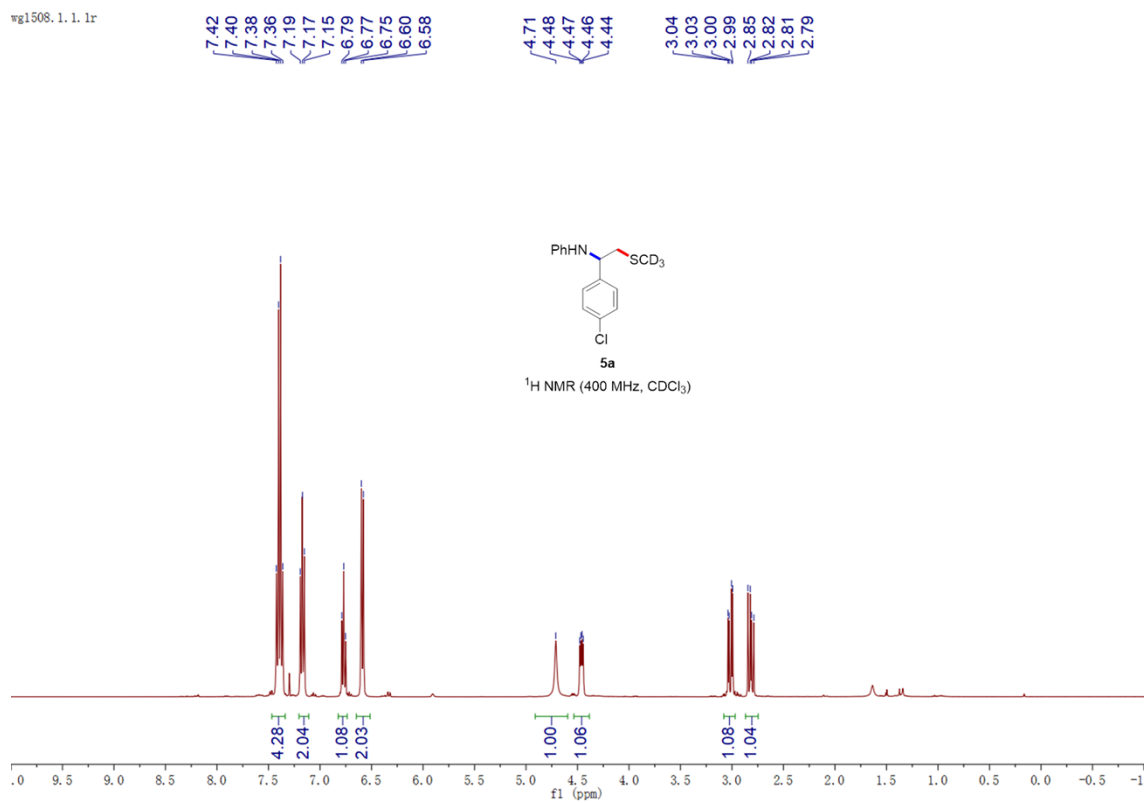

pdata/1

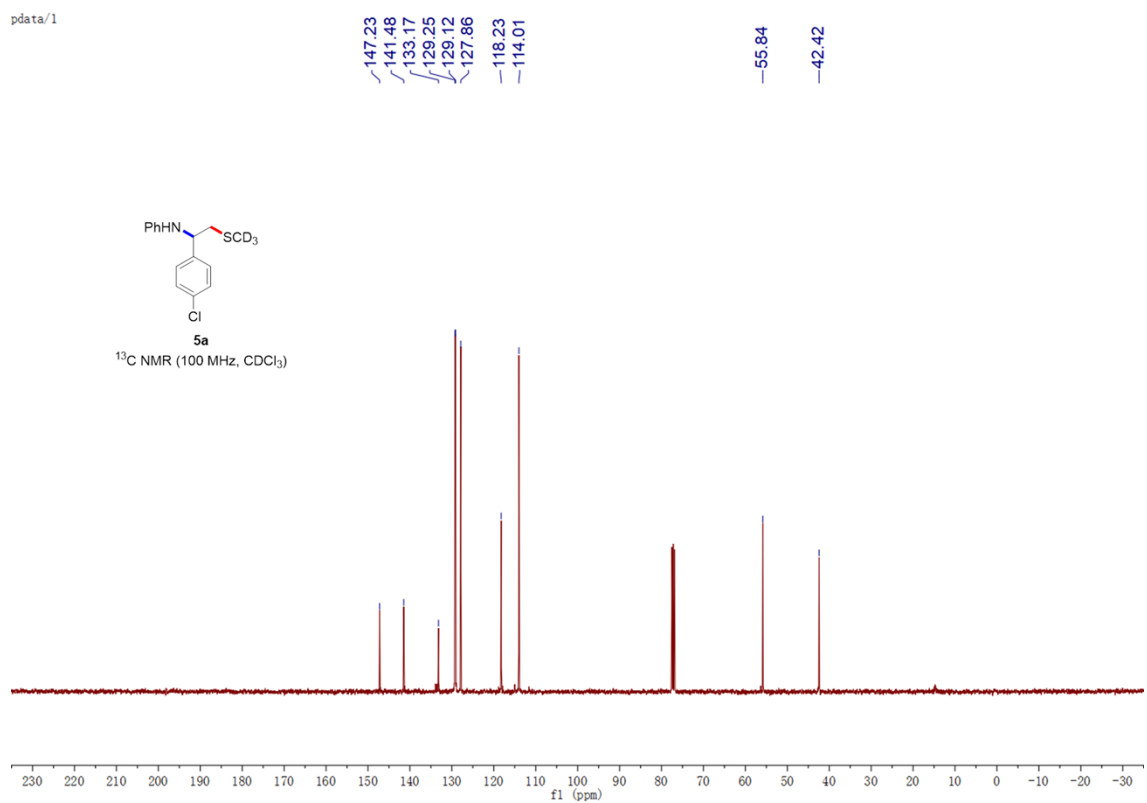

wg1617.1.1.1r

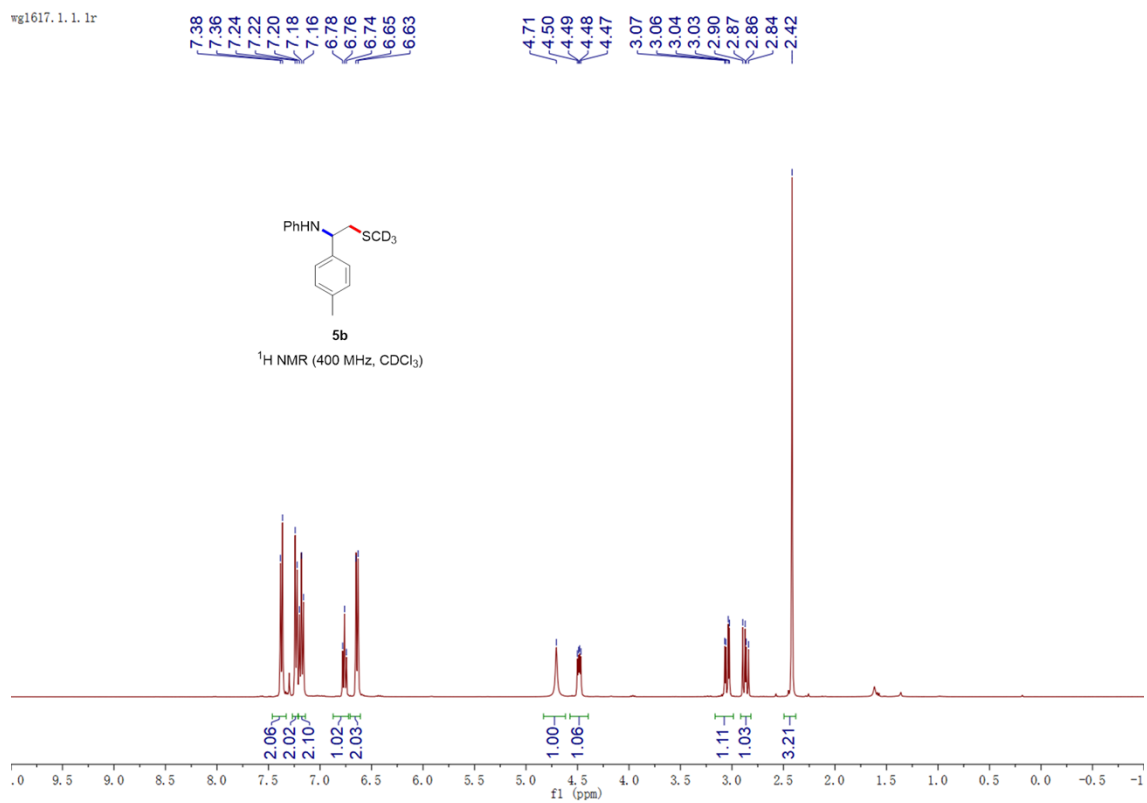

pdata/1

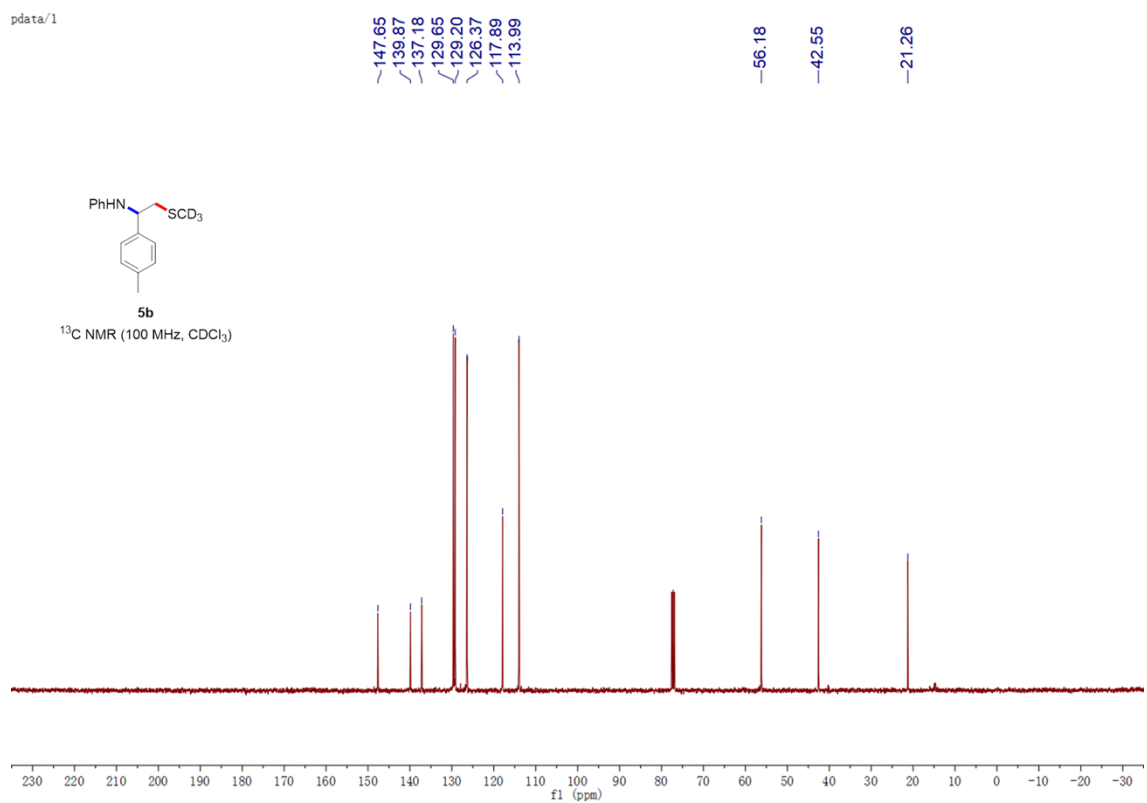

wg1509.1.1.1r

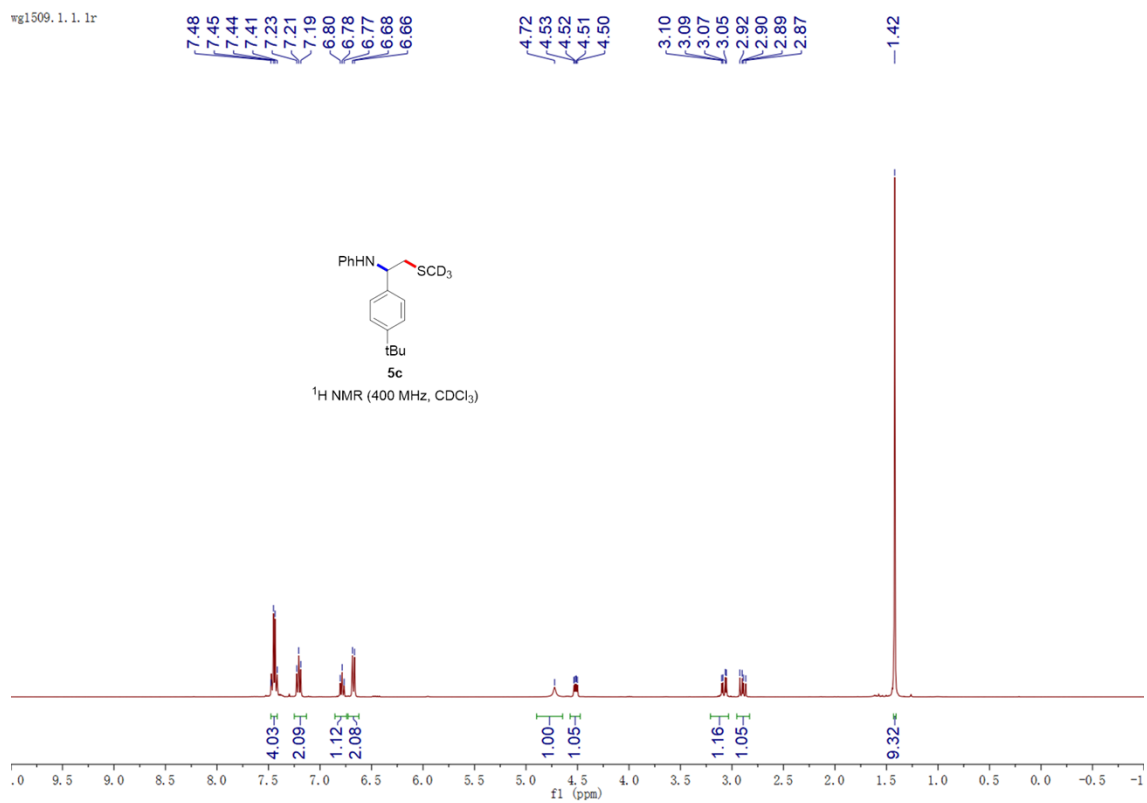

pdata/1

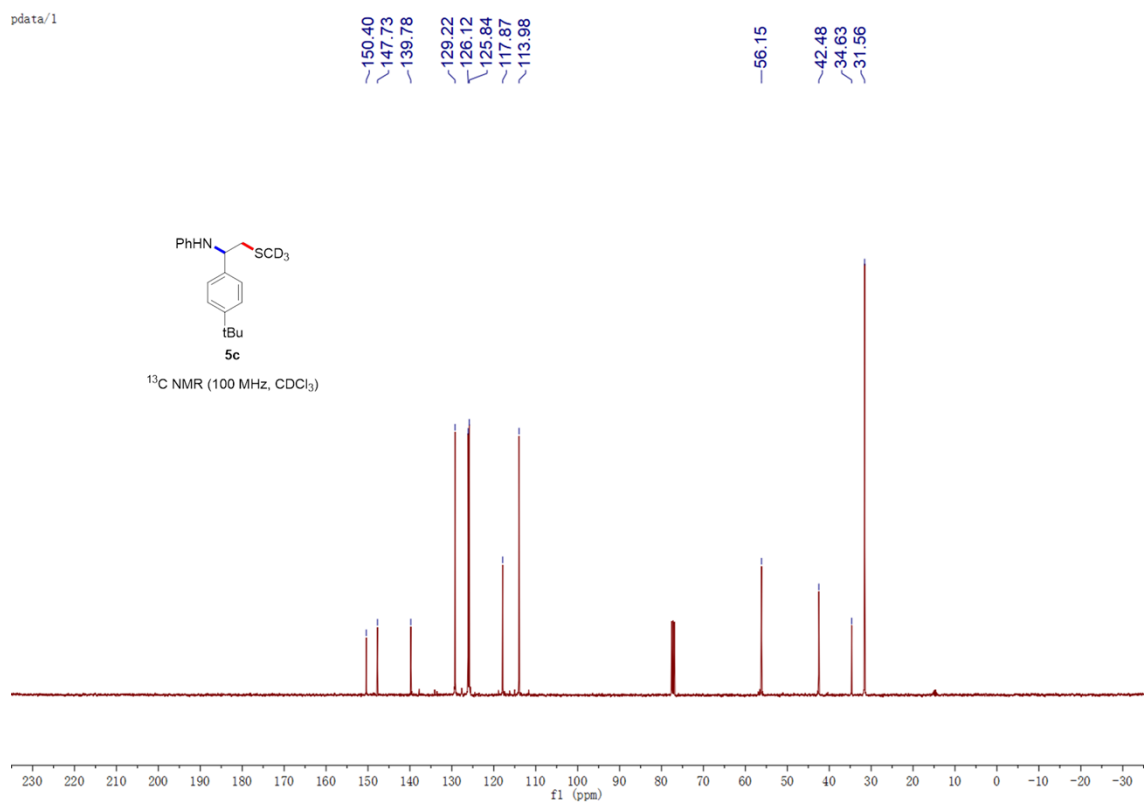

7.261  
7.244  
7.233  
7.233  
7.211  
7.211  
6.777  
6.755  
6.774  
6.771  
6.699  
4.112  
3.222  
3.211  
3.199  
2.666  
2.655  
2.644  
2.622  
2.611  
2.422  
2.411  
2.411  
2.388  
2.377  
2.233  
2.222  
2.200  
2.199  
2.188  
1.877  
1.866  
1.855  
1.855  
1.844  
1.844  
1.833  
1.833  
1.799  
1.788  
1.777  
1.777  
1.677  
1.666  
1.655  
1.644  
1.499  
1.466  
1.466  
1.455  
1.455  
1.444  
1.444  
1.433  
1.422  
1.422  
1.400  
1.299  
1.266

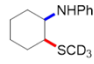

5d

<sup>1</sup>H NMR (400 MHz, CDCl<sub>3</sub>)

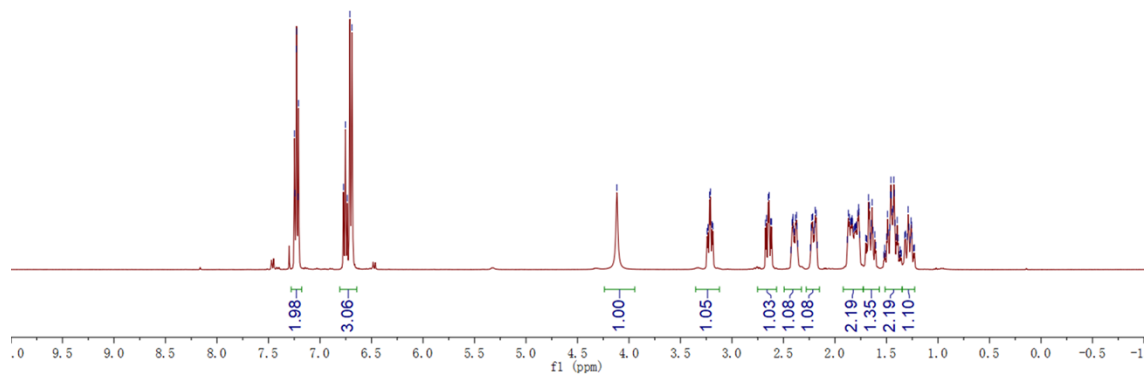

pdata/1

-147.76

-129.35

-117.47

-113.43

-55.33

-49.73

33.17

32.24

25.75

24.33

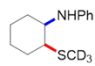

5d

<sup>13</sup>C NMR (100 MHz, CDCl<sub>3</sub>)

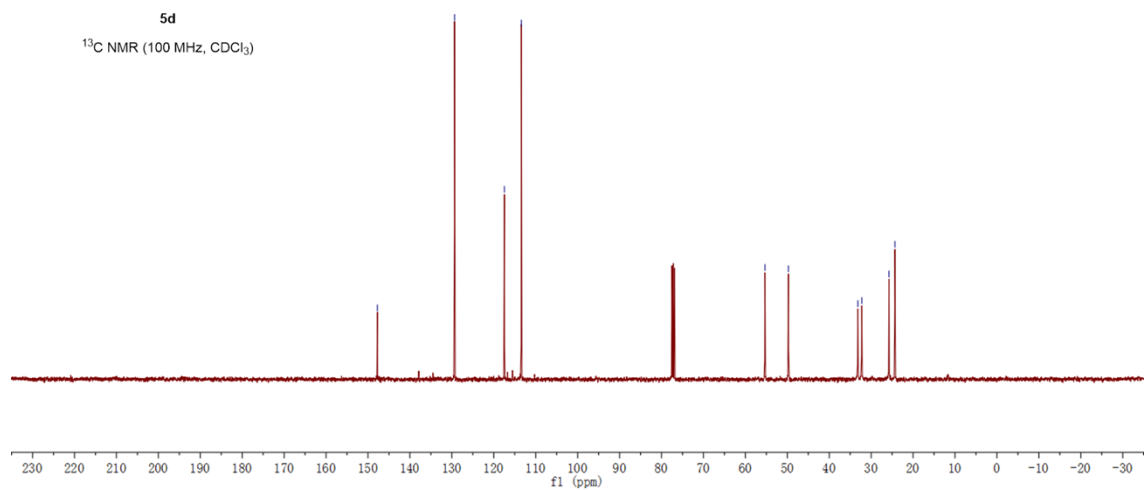

wg1614.1.1.1r

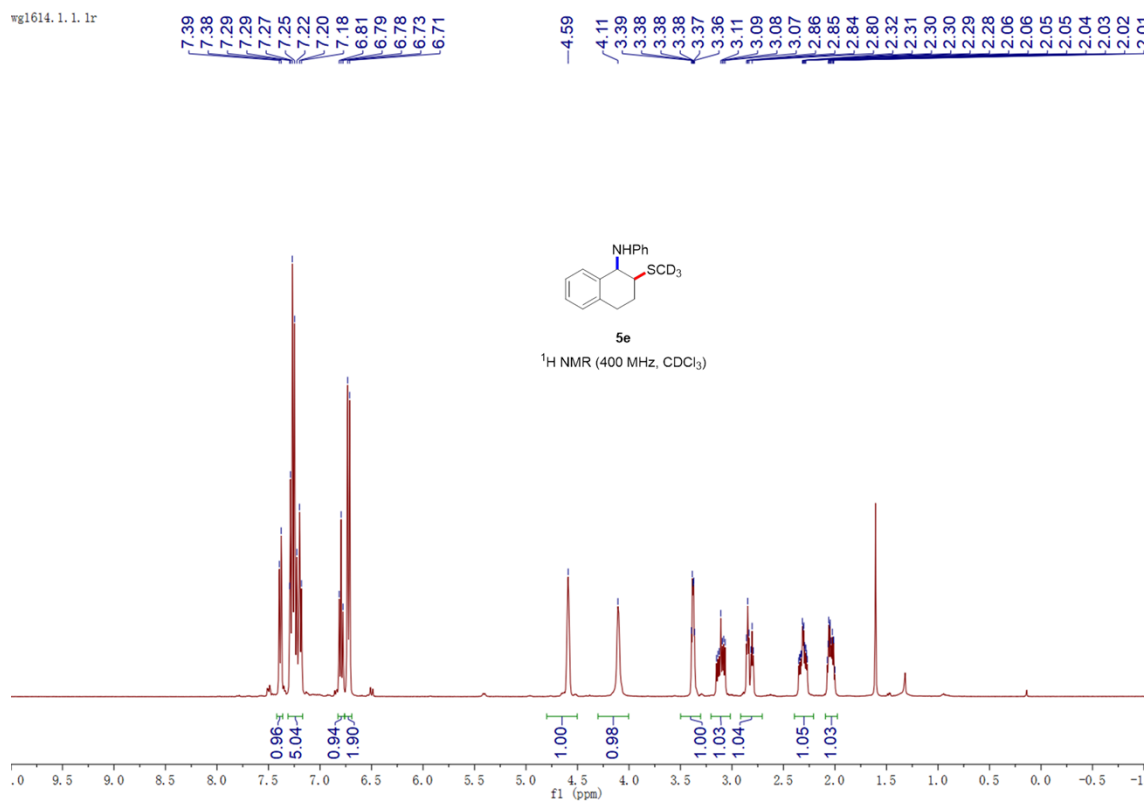

pdata/1

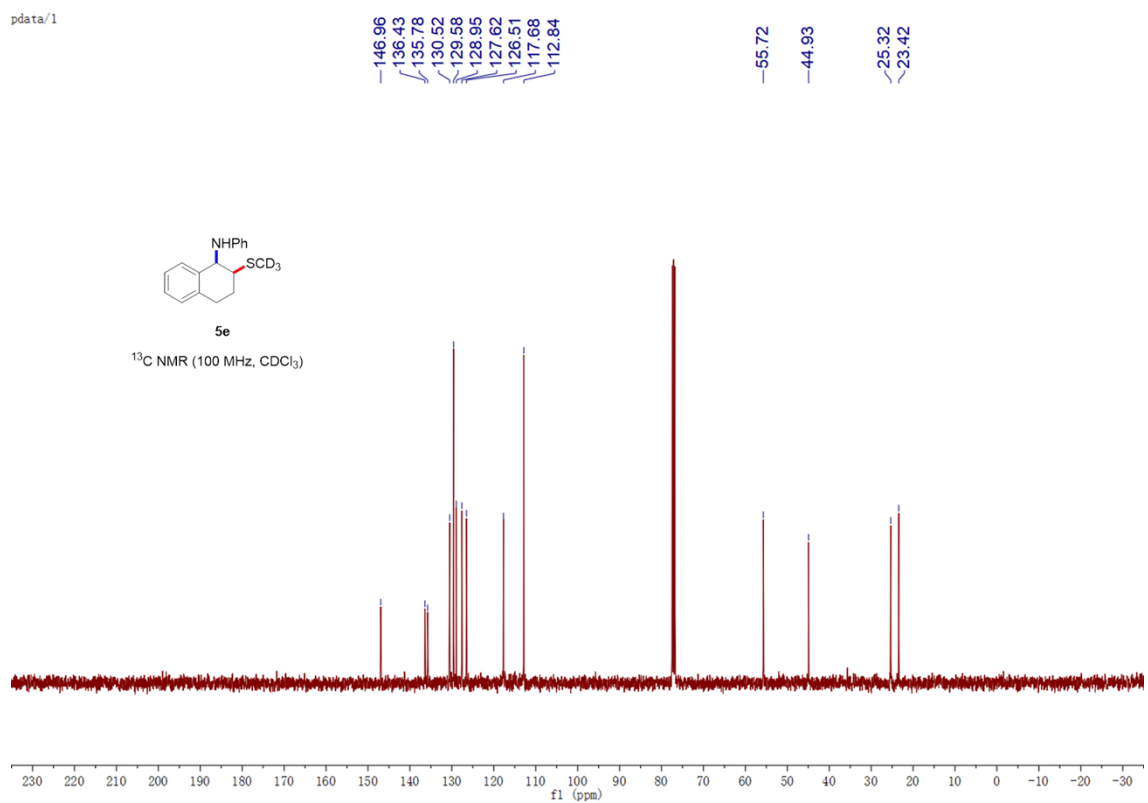

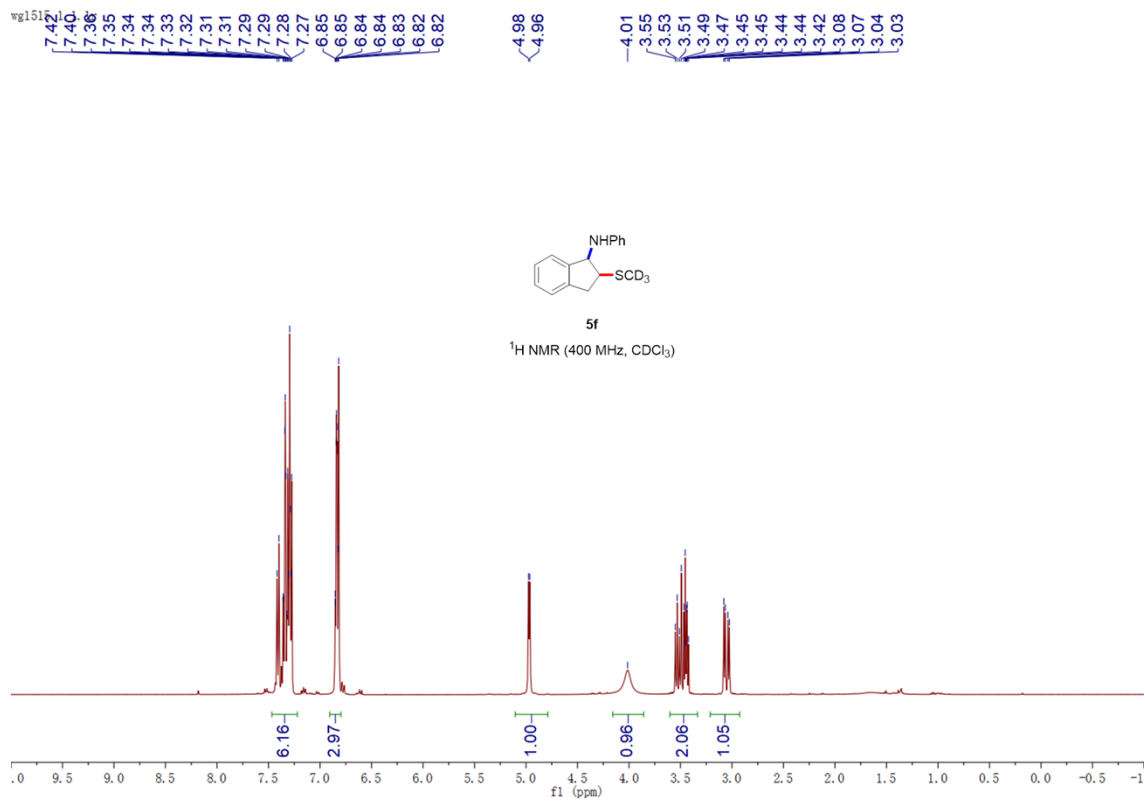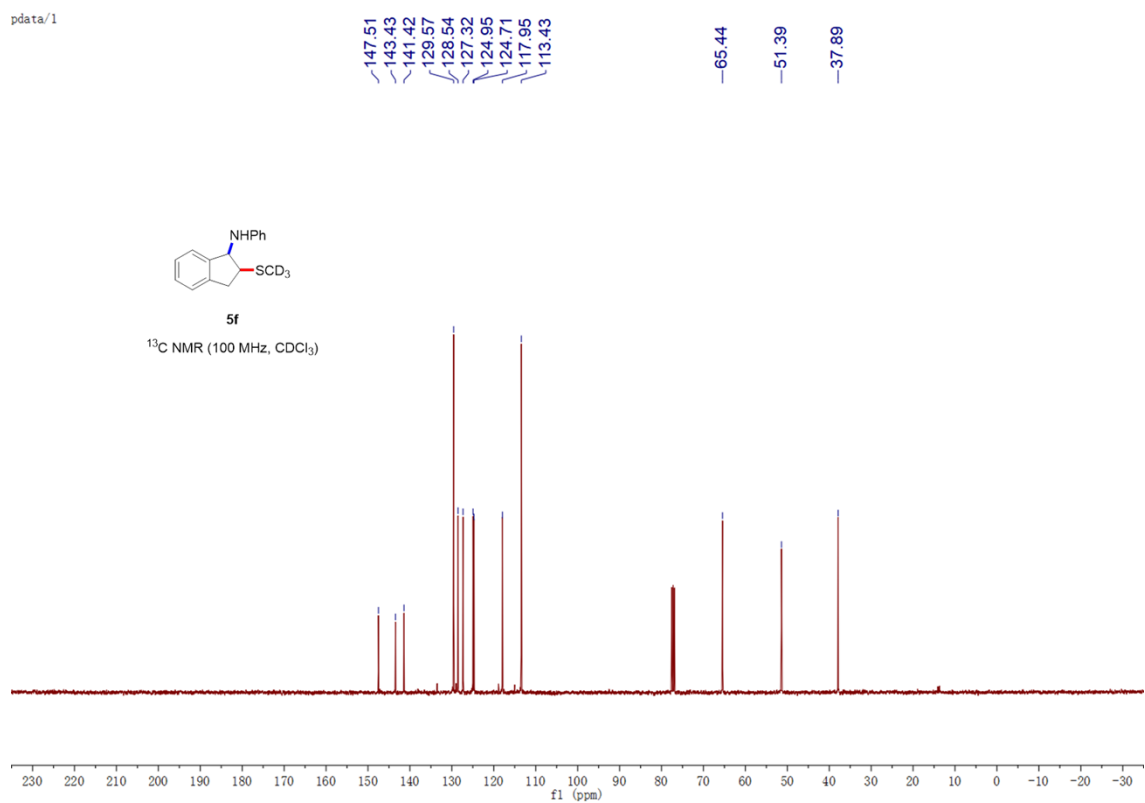

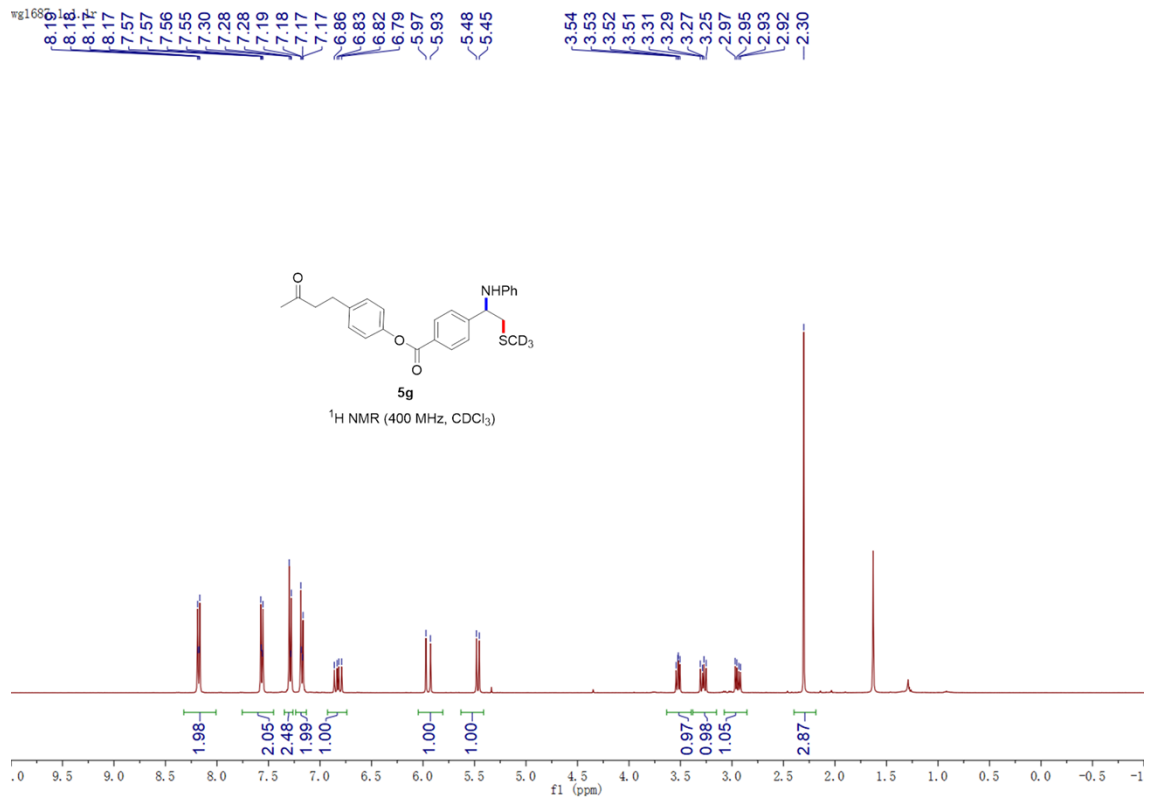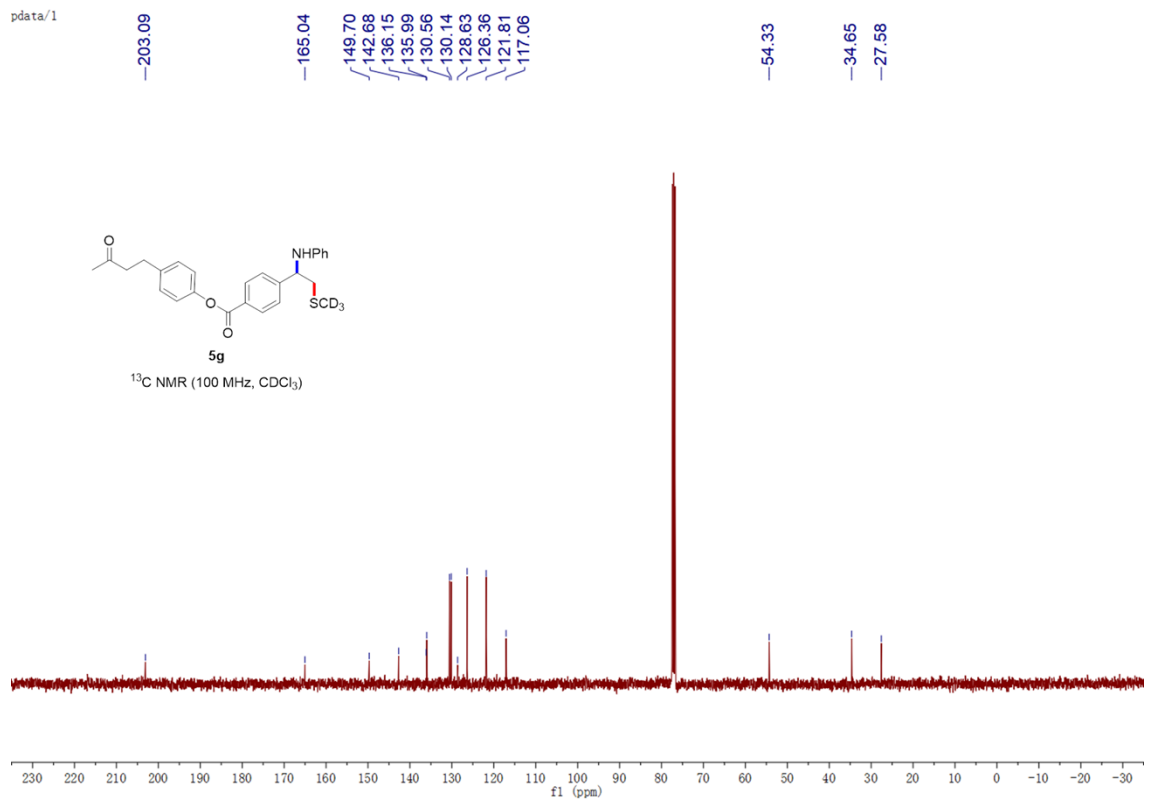

8.34  
8.32  
7.67  
7.65  
7.23  
7.21  
7.19  
6.81  
6.66  
6.64  
3.09  
3.08  
2.92  
2.90  
2.74  
2.72  
2.70  
2.24  
2.17  
2.12  
1.69  
1.66  
1.64  
1.62  
1.54  
1.54  
1.53  
1.51  
1.50  
1.49  
1.47  
1.42  
1.42  
1.41  
1.39  
1.37  
1.37  
1.36  
1.33  
1.28  
1.27  
1.27  
1.26  
1.25  
1.24  
1.23  
1.22  
1.20  
1.19  
1.18  
1.18  
1.17  
0.99  
0.96

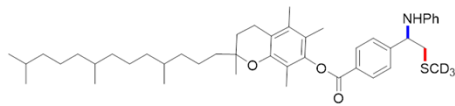

**5h**  
<sup>1</sup>H NMR (400 MHz, CDCl<sub>3</sub>)

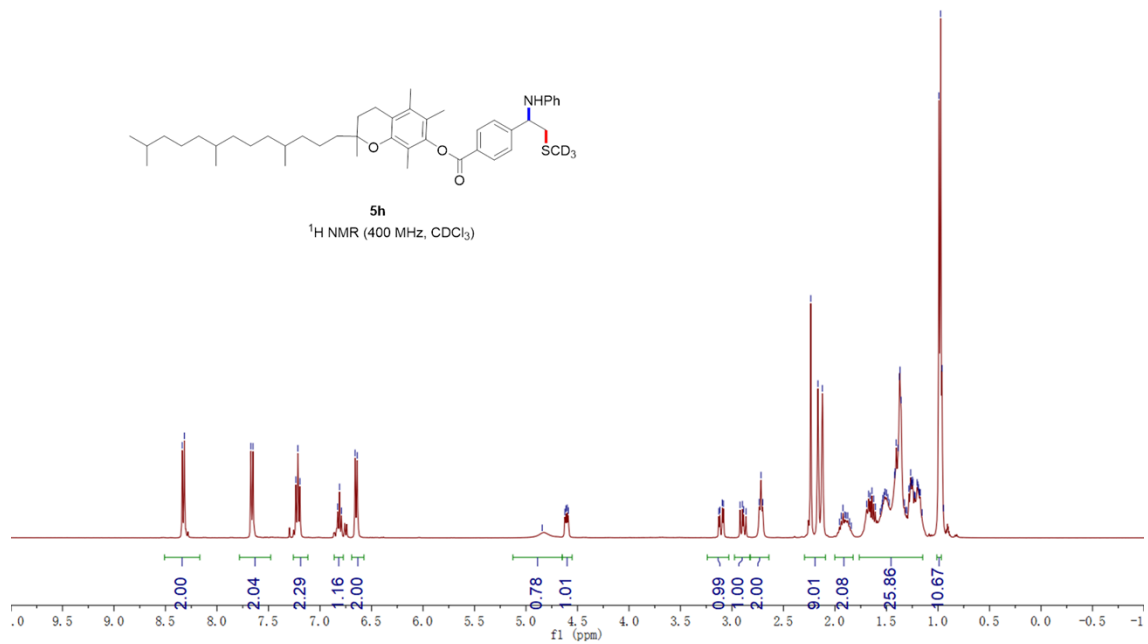

pdata/1

165.03  
149.61  
149.04  
147.21  
140.77  
130.93  
129.39  
129.31  
129.07  
127.05  
126.76  
125.28  
123.25  
118.34  
117.60  
115.19  
114.03  
75.19  
56.32  
42.26  
39.53  
37.60  
37.44  
32.95  
28.13  
24.96  
24.60  
24.35  
23.84  
22.90  
22.81  
21.18  
20.79  
19.93  
19.84  
13.25  
12.40  
12.00

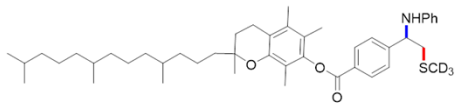

**5h**  
<sup>13</sup>C NMR (100 MHz, CDCl<sub>3</sub>)

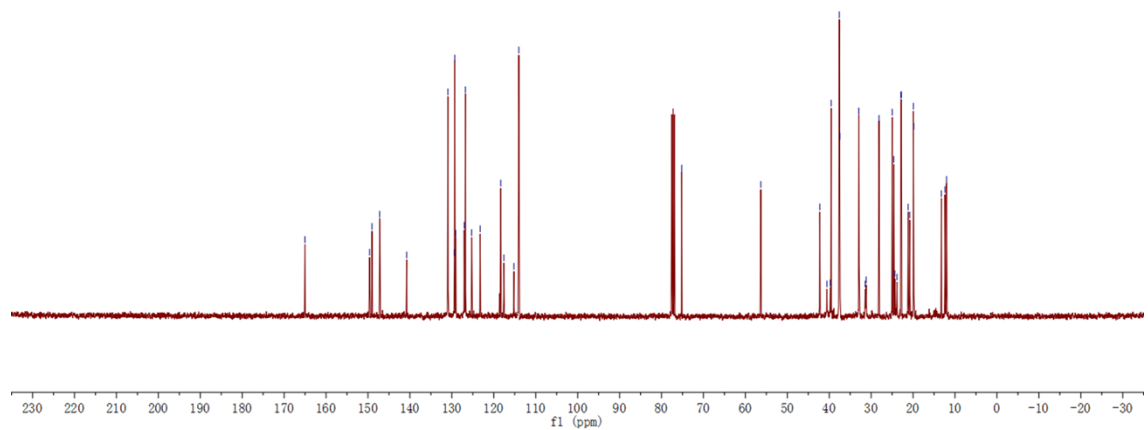



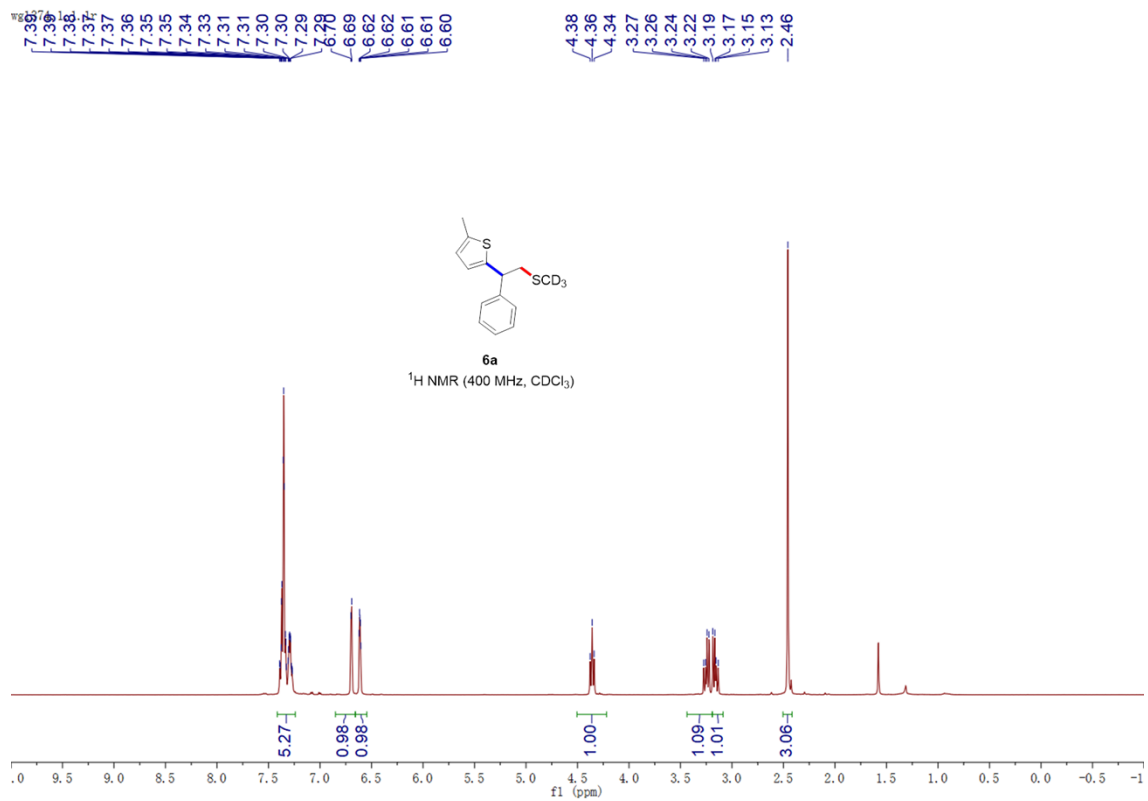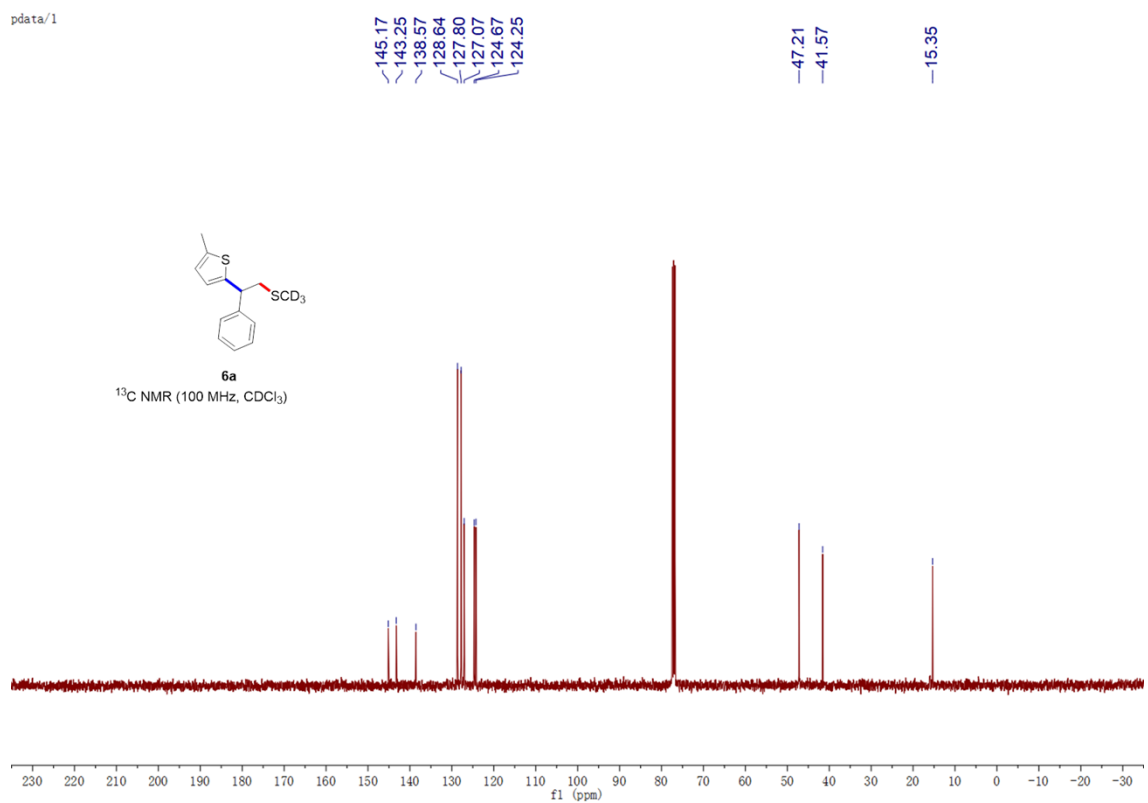

wg1521.1.1.1r

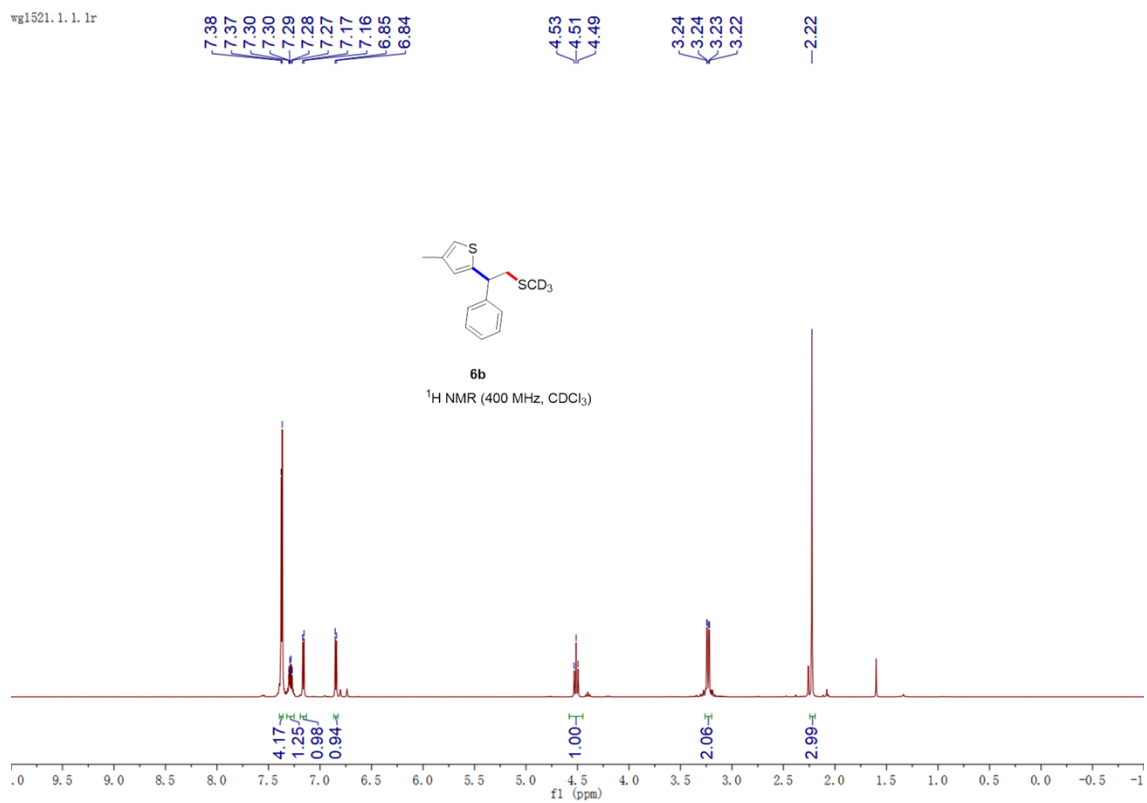

pdata/1

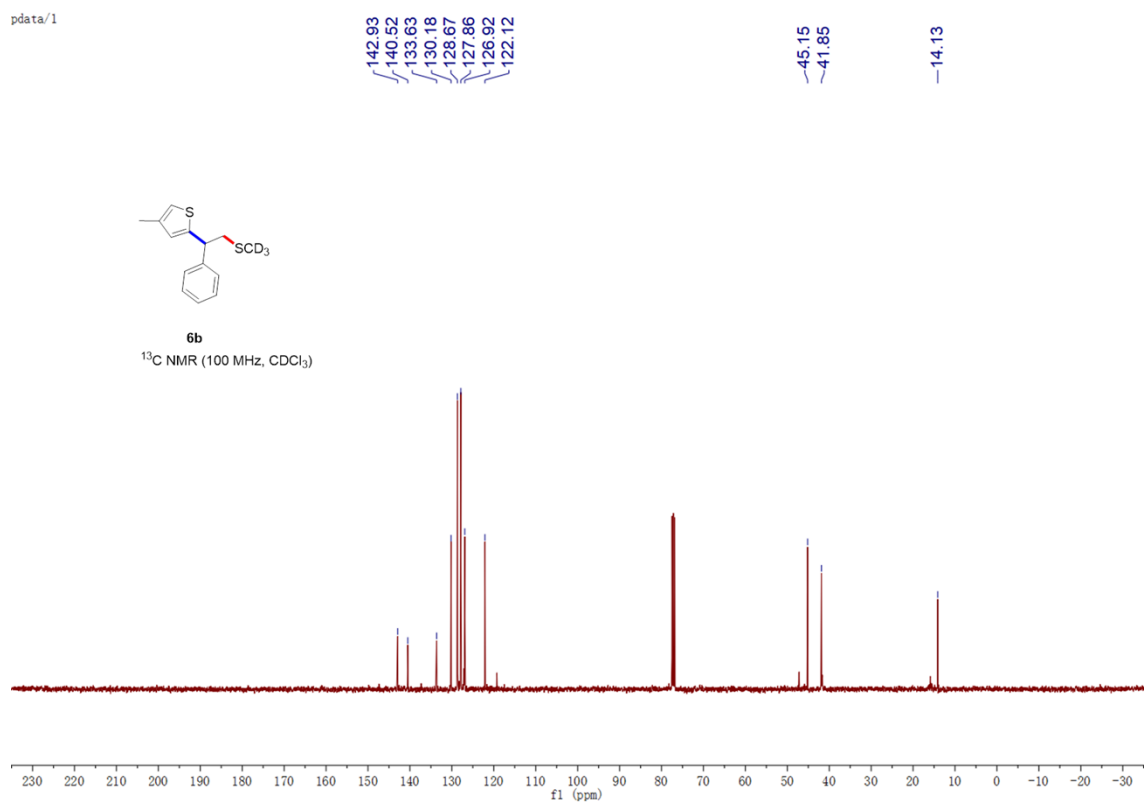

wg1546.1.1.1r

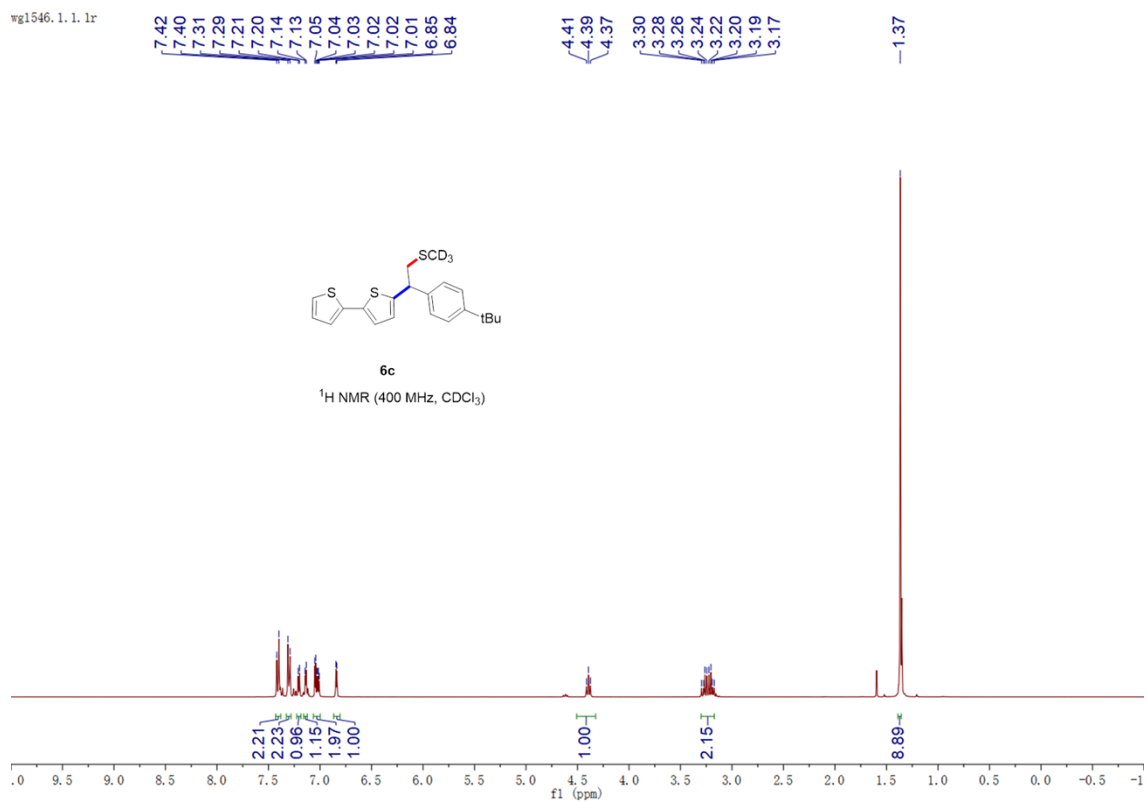

pdata/1

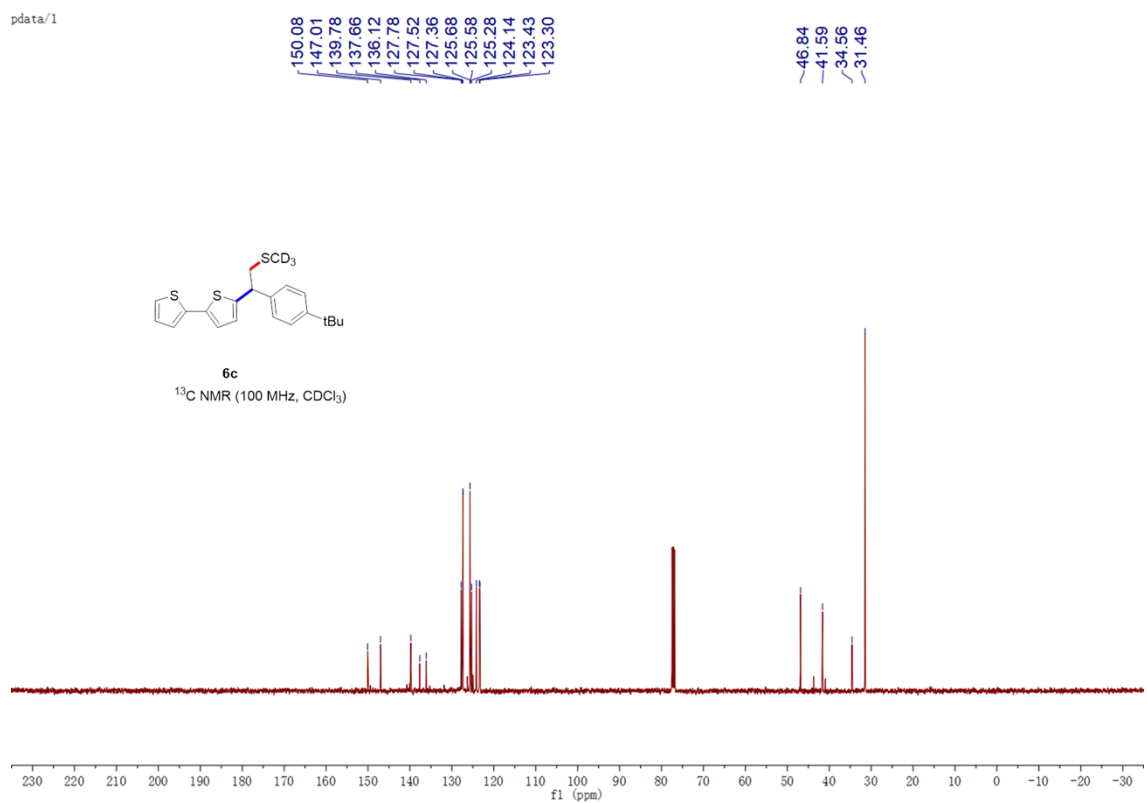

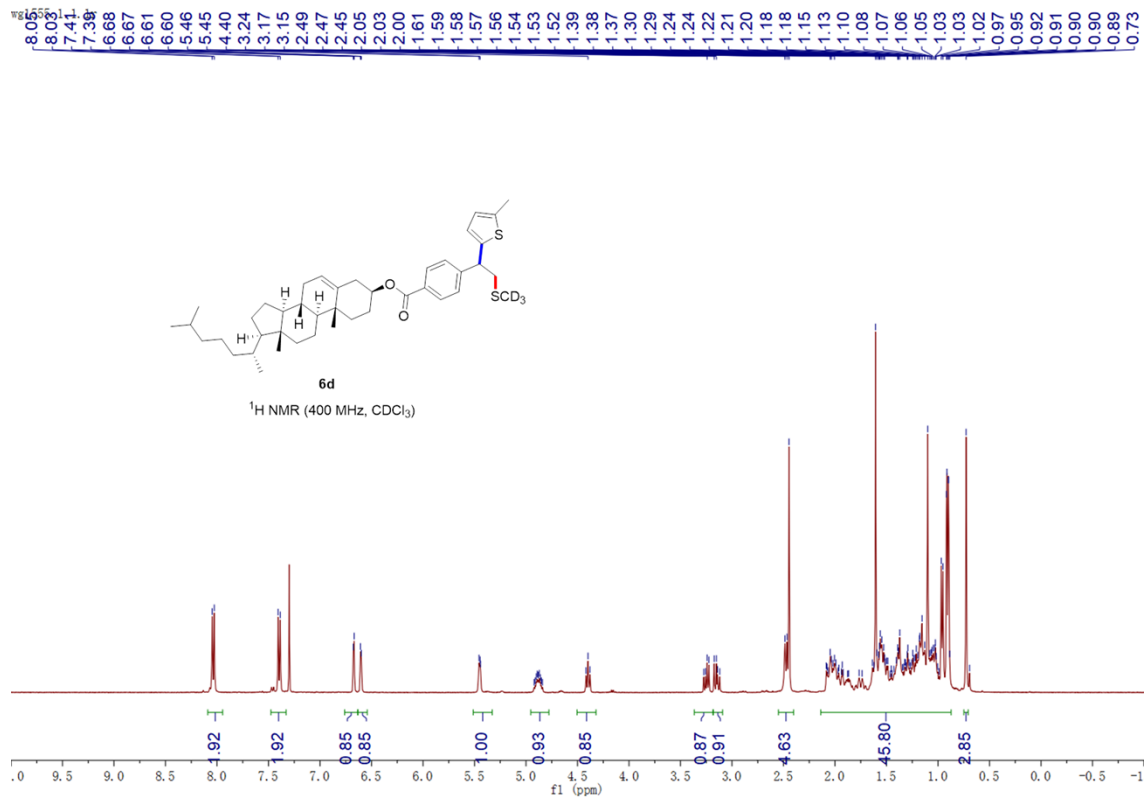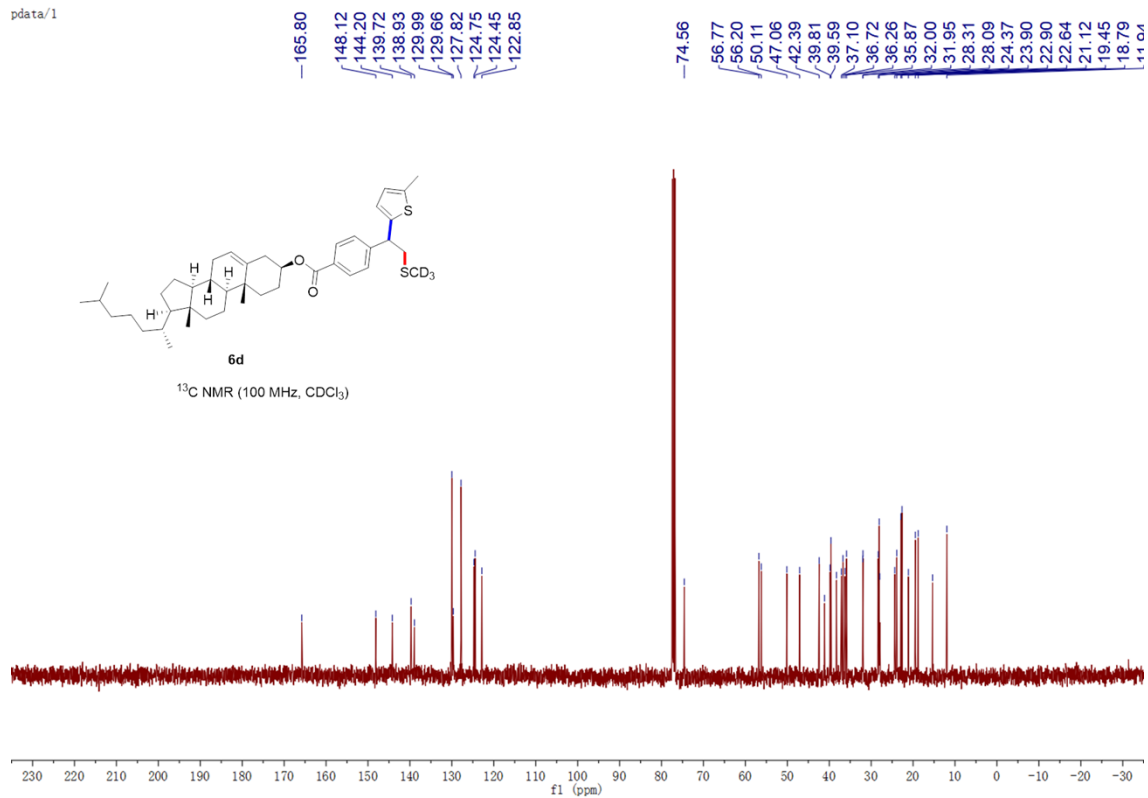

wg1628.1.1.1r

8.20  
8.18  
7.49  
7.46  
7.30  
7.28  
7.26  
7.14  
7.12  
6.71  
6.70  
6.63  
6.62  
4.46  
4.44  
4.42  
3.30  
3.28  
3.27  
3.25  
3.21  
3.18  
3.17  
3.15  
2.97  
2.96  
2.95  
2.94  
2.83  
2.82  
2.81  
2.80  
2.46  
2.19

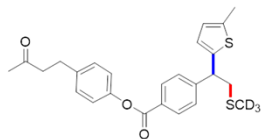

<sup>1</sup>H NMR (400 MHz, CDCl<sub>3</sub>)

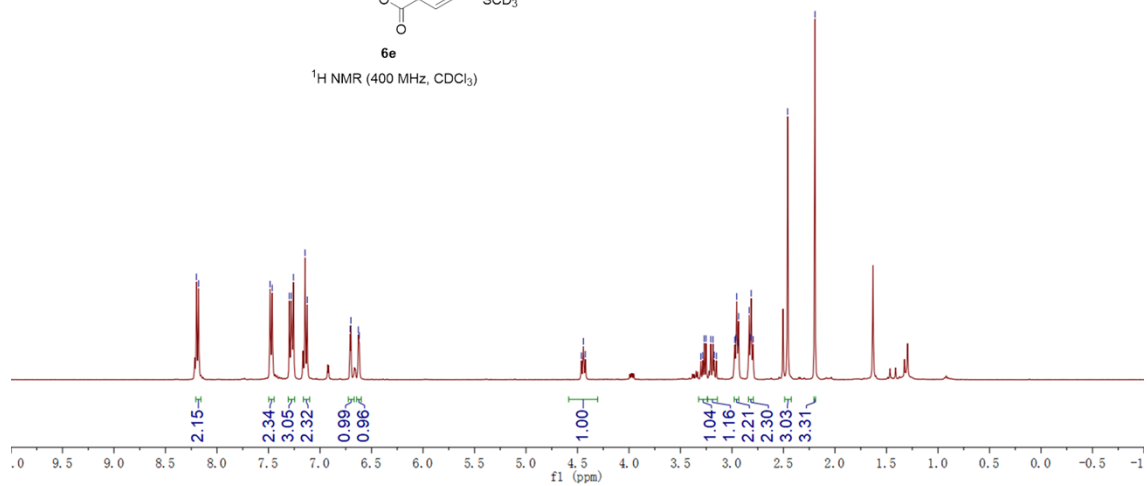

pdata/1

207.84  
149.28  
149.11  
143.97  
139.08  
138.71  
130.62  
129.42  
128.48  
128.36  
128.13  
124.81  
124.53  
121.73  
47.08  
45.20  
41.07  
30.19  
29.15  
15.36

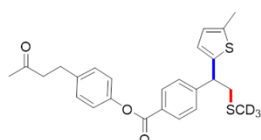

<sup>13</sup>C NMR (100 MHz, CDCl<sub>3</sub>)

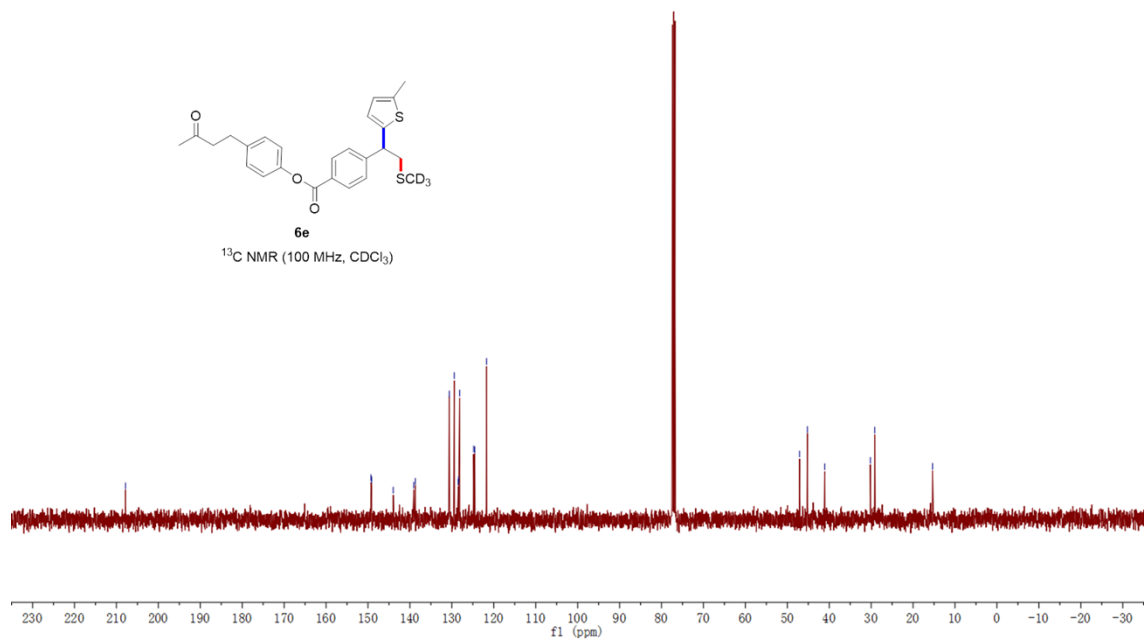

## HRMS of Products

1485 #11 RT: 0.13 AV: 1 NL: 2.13E5  
T: FTMS (1,1) + pAPCI corona Full ms [100.00-1000.00]

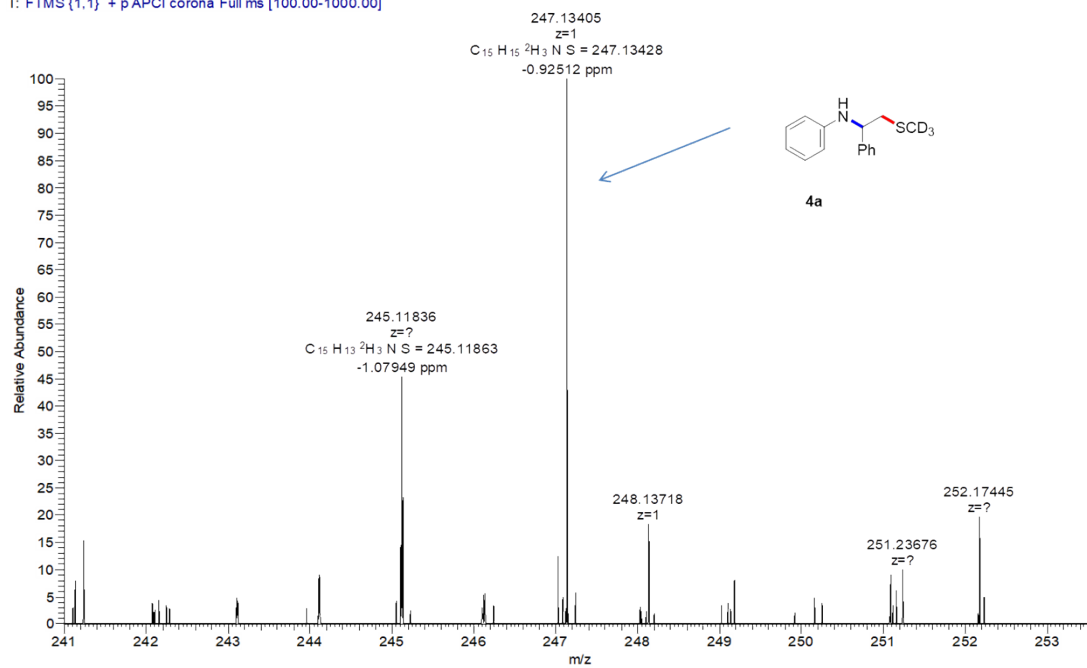

1469

wy20240108-2.54 (1.068) AM2 (Ar:20000,0,0,0,0,0); Cm(54-6x1.500)

1: TCFMSES+  
76

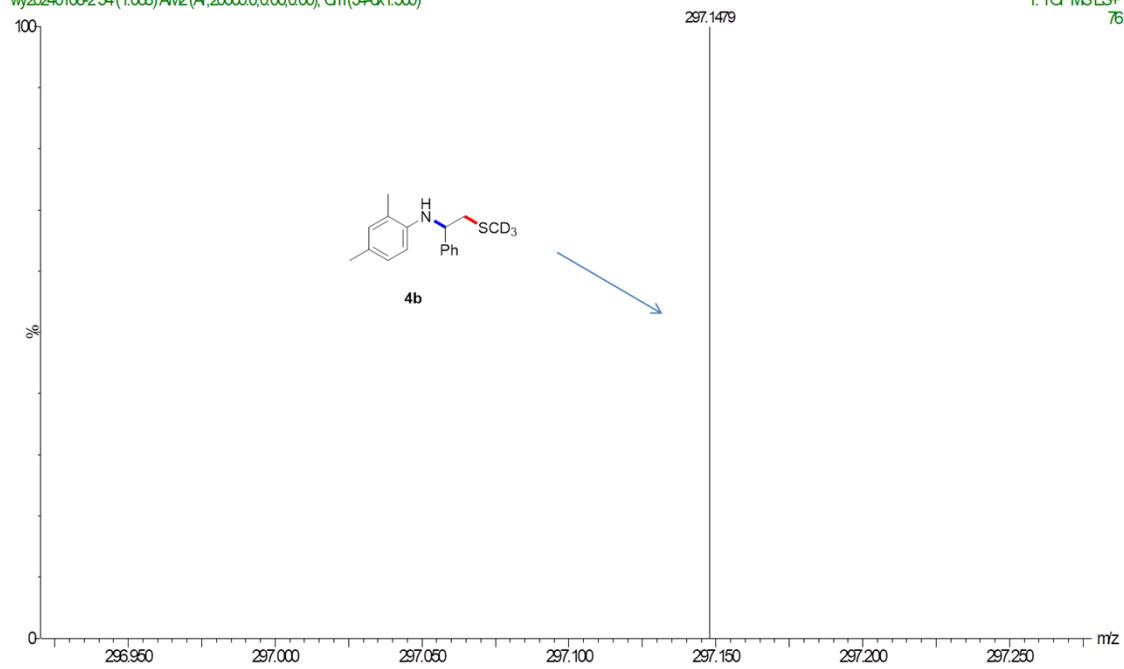

1493

wy20240108-3.45 (0.895) AM2 (Ar:20000,0,0,0,0,0); Cm(45-5x1.500)

1: TCFMSES+  
5.46e4

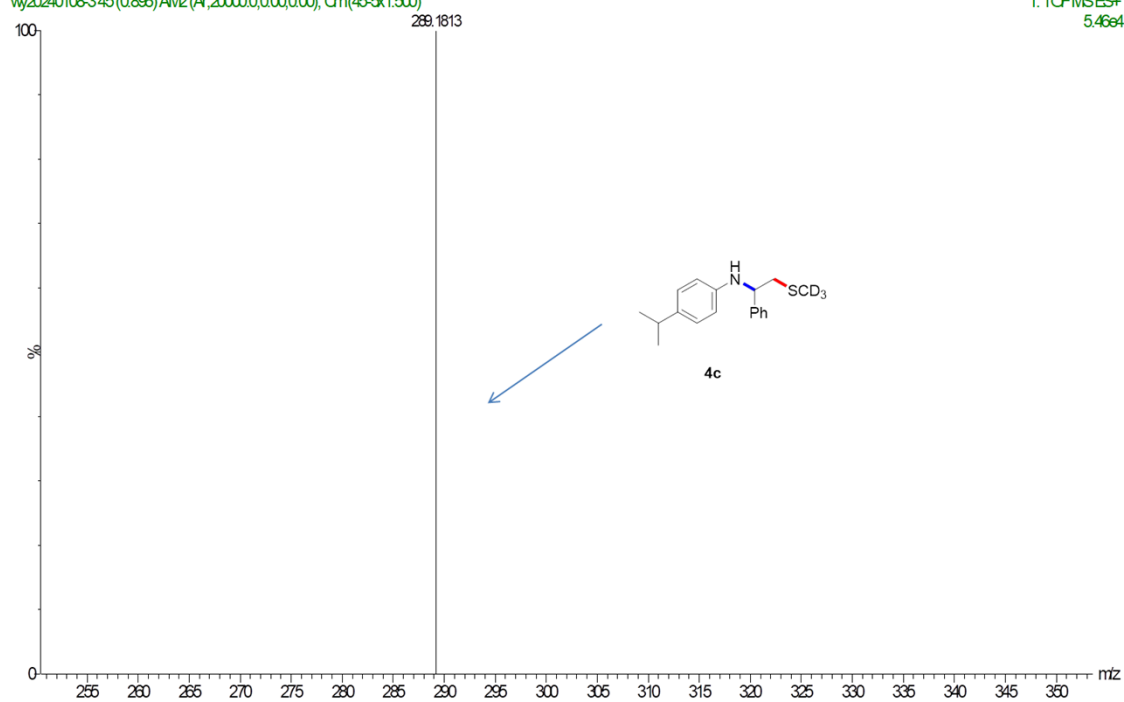

1482

wy20240108-4-3 17 (0.364) AM2 (Ar,20000,0,0,0,0,00); Cm(17-3x1.500)

1: TCFMSES+  
5.42e6

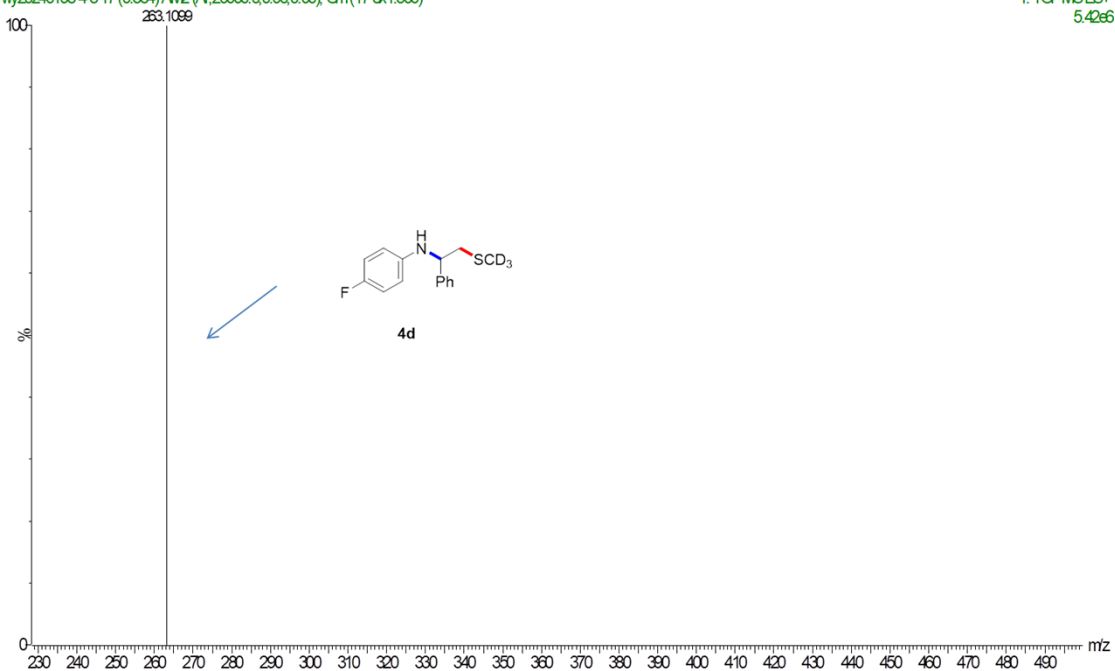

1477

wy20240108-5-39 (0.775) AM2 (Ar,20000,0,0,0,0,00); Cm(39-5x1.500)

1: TCFMSES+  
2.04e4

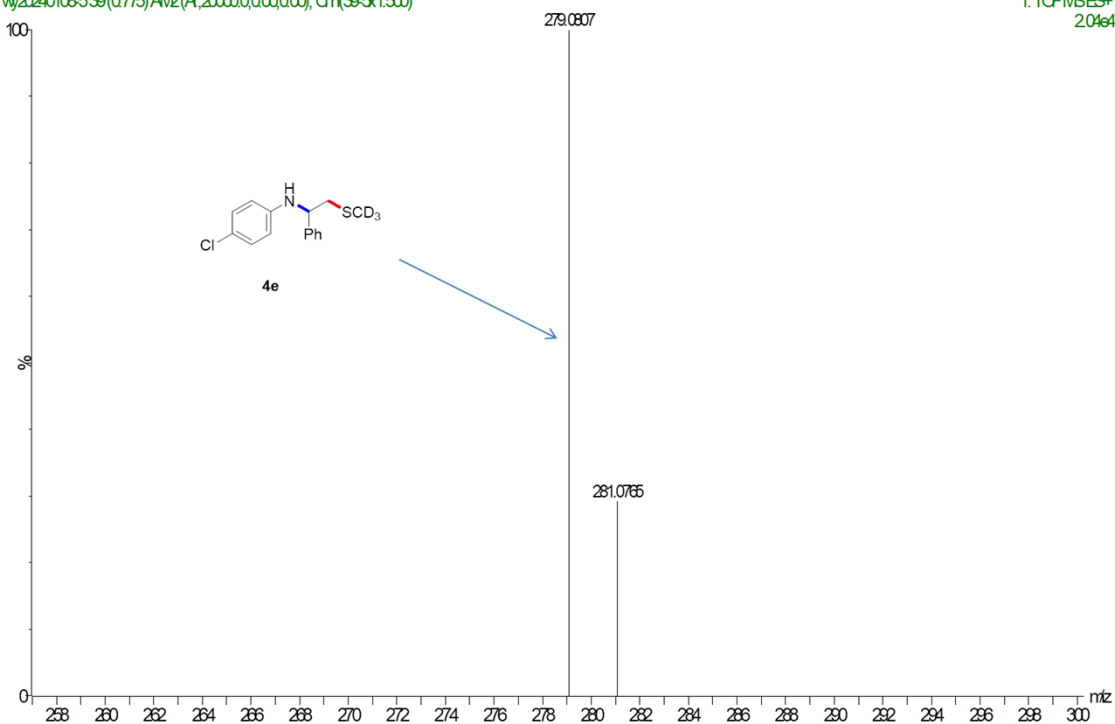



1468 #16 RT: 0.19 AV: 1 NL: 1.11E5  
T: FTMS (1,2) - p APCI corona Full ms [100.00-1000.00]

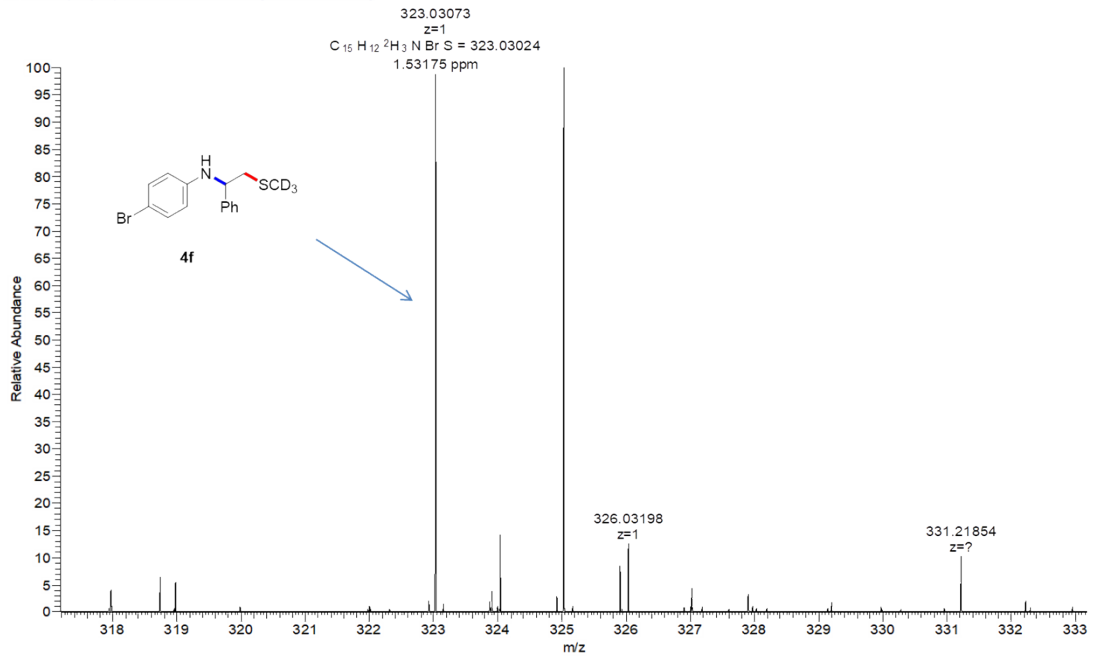

146635 (0.708) AM2 (Ar,20000,0,0,0,0,0); Om(35-8x1.500)

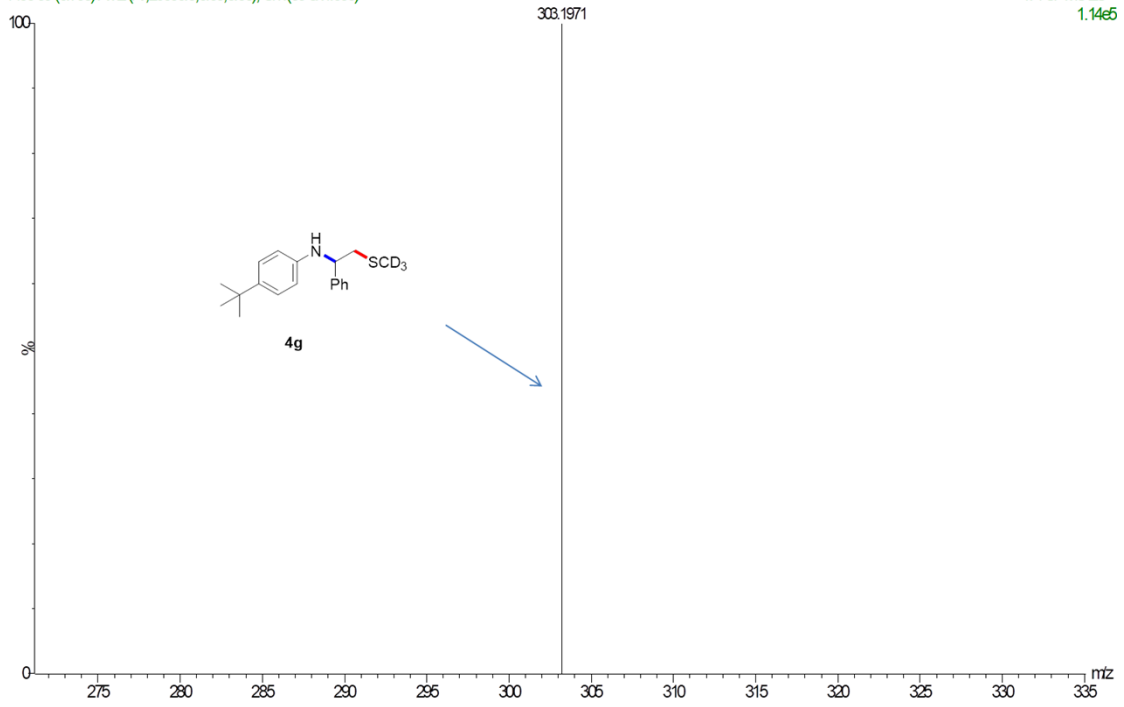

1481

wj21240108843(0.862)/AM2(Ar,20000,0,00,0,00); Cr1(43-8x1.500)

1: TCFMSES+  
1.05e5

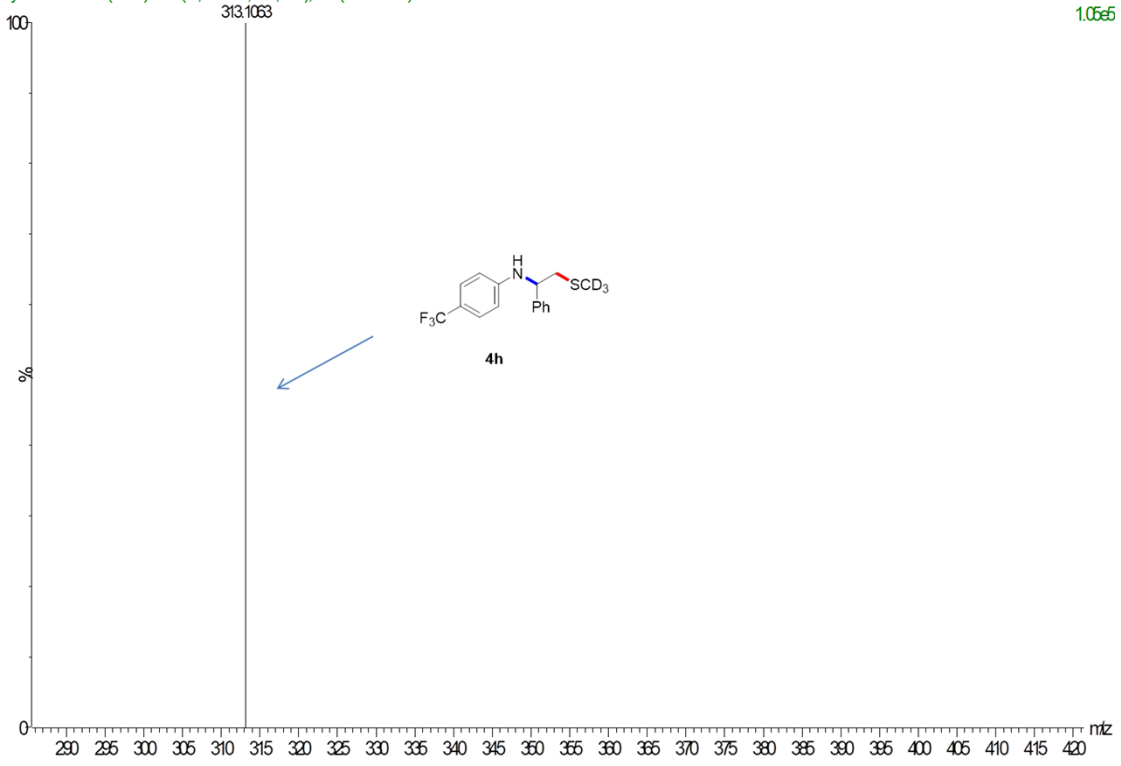

1470

wj21240108938(0.758)/AM2(Ar,20000,0,00,0,00); Cr1(38-8x1.500)

1: TCFMSES+  
4.51e4

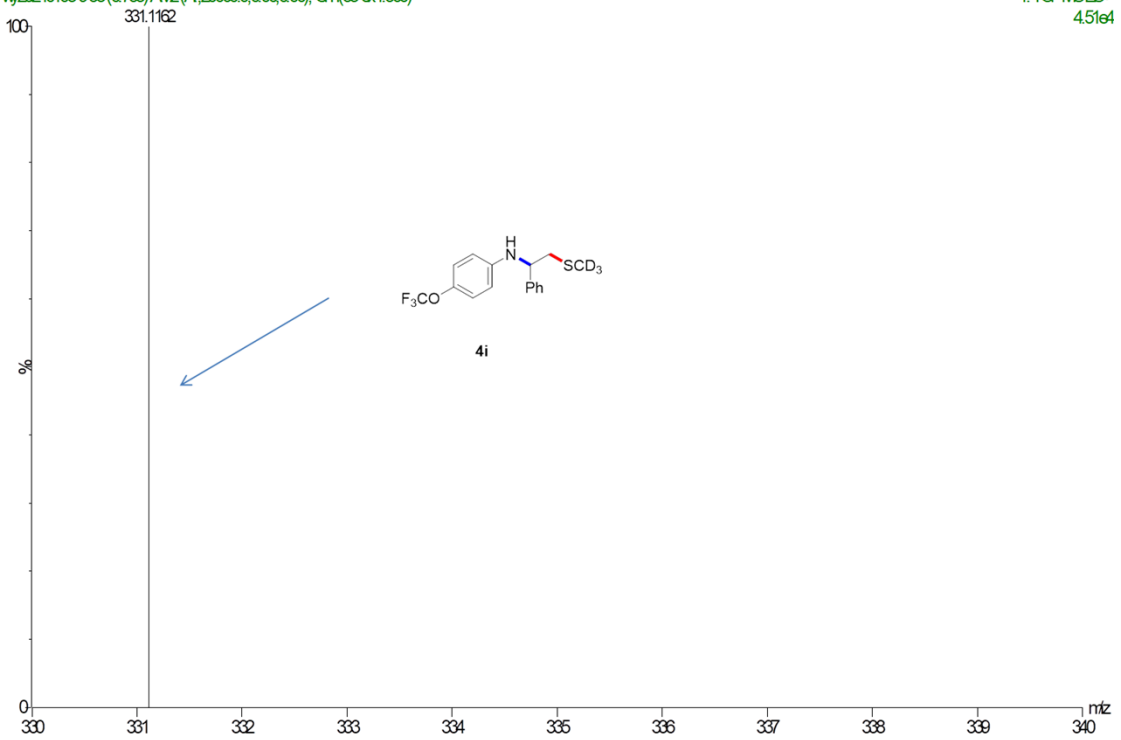

1487

wj20240108-10-29 (0.585) AM2 (Ar,20000,0,0,0,0,0); Cm(29-8x1.50)

1: TCFMSES+  
3.42e5

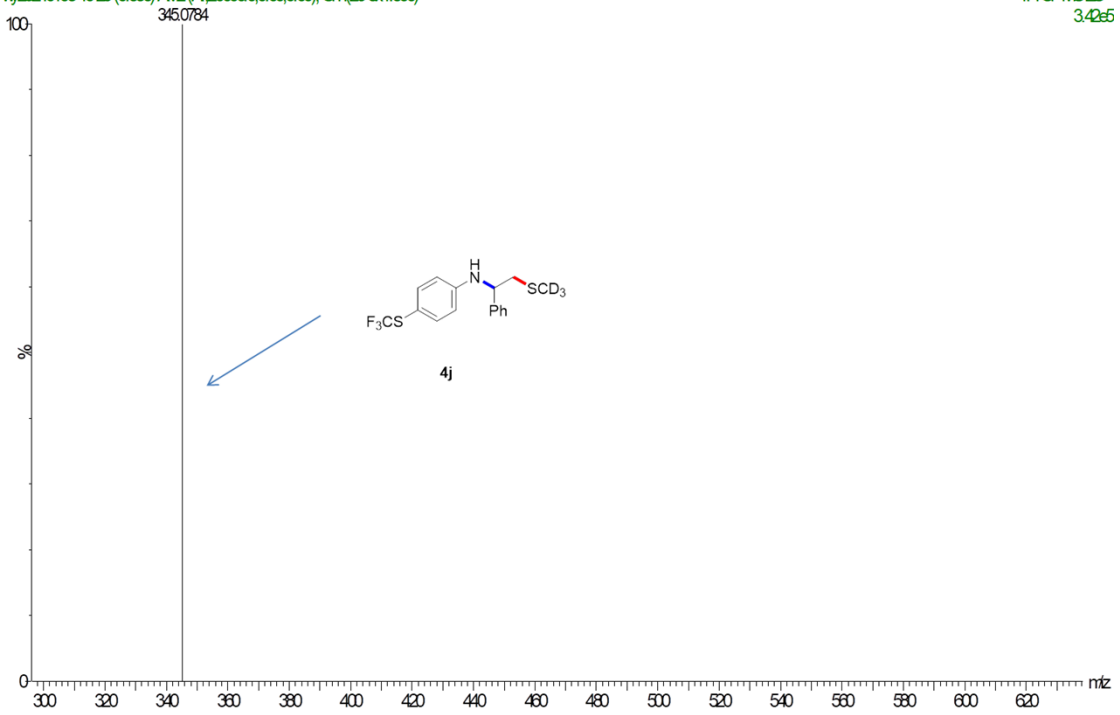

1486

wj20240108-11-40 (0.752) AM2 (Ar,20000,0,0,0,0,0); Cm(40-7x1.50)

1: TCFMSES+  
9.07e4

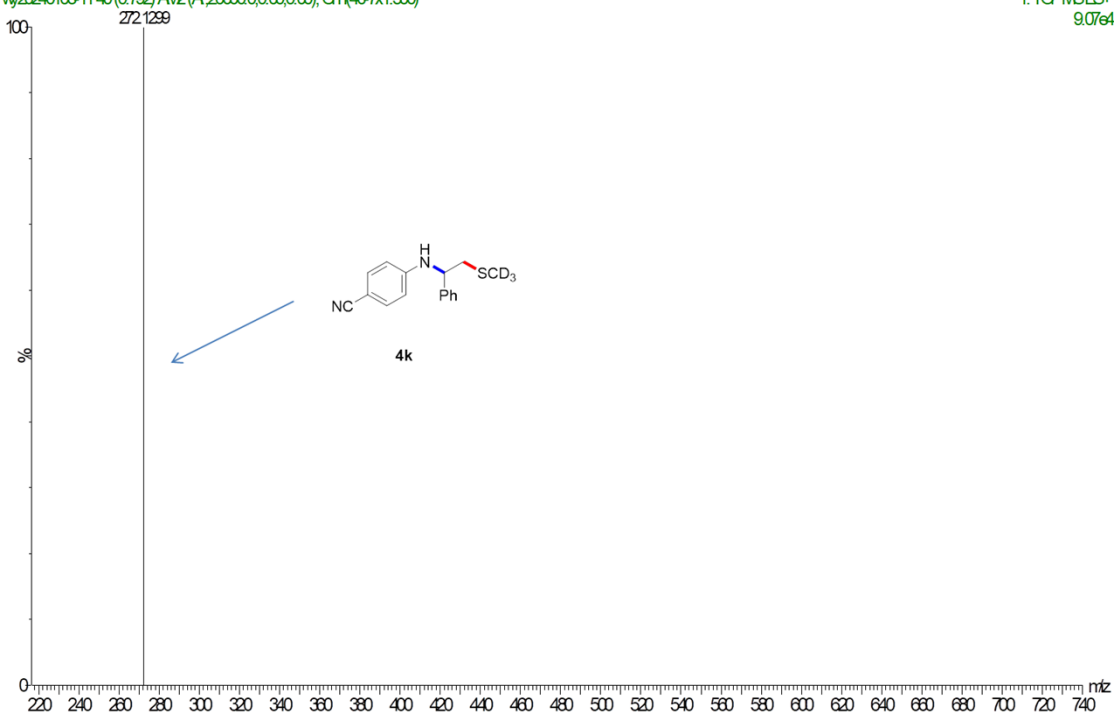

1488-1

wy20240108-12:22:23 (0.465) AM2 (Ar,20000.0,0.00,0.00); Cm(23-8x1.500)

1: TCFMSES+  
1.92e4

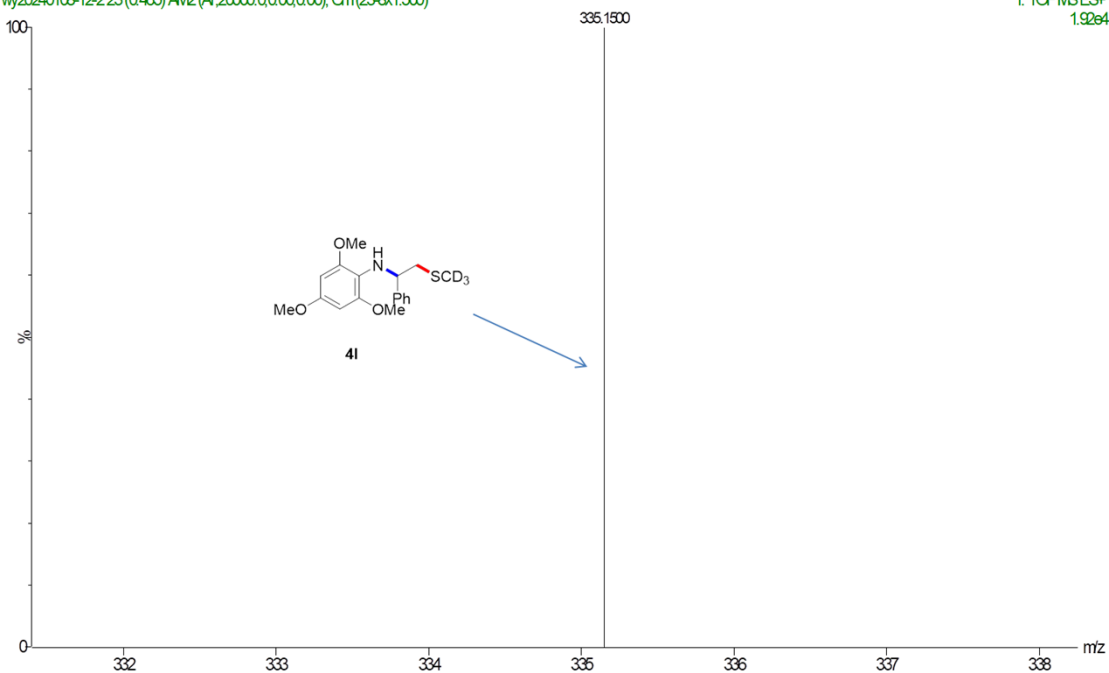

1500

wy20240108-13:44 (0.879) AM2 (Ar,20000.0,0.00,0.00); Cm(44-7x1.500)

1: TCFMSES+  
3.32e6

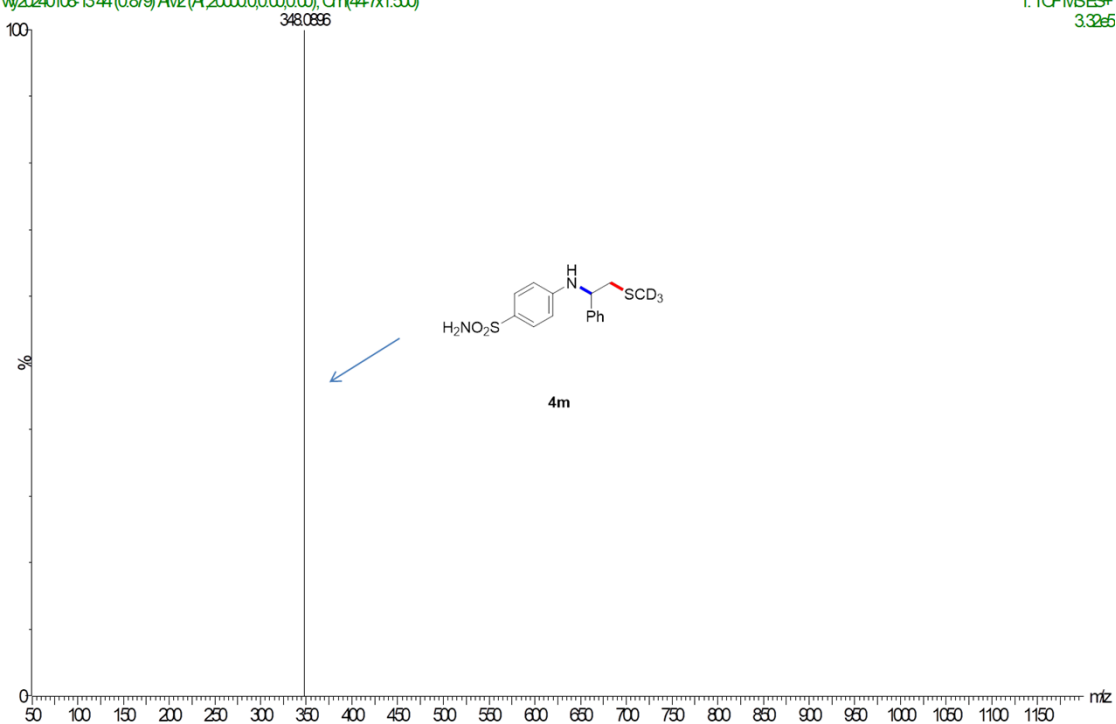

1609

wj20240108-14.36 (0.725) AM2 (Ar,20000.0,0.00,0.00); Cm(36-7x1.50)

1: TCFMSES+  
8.55e6

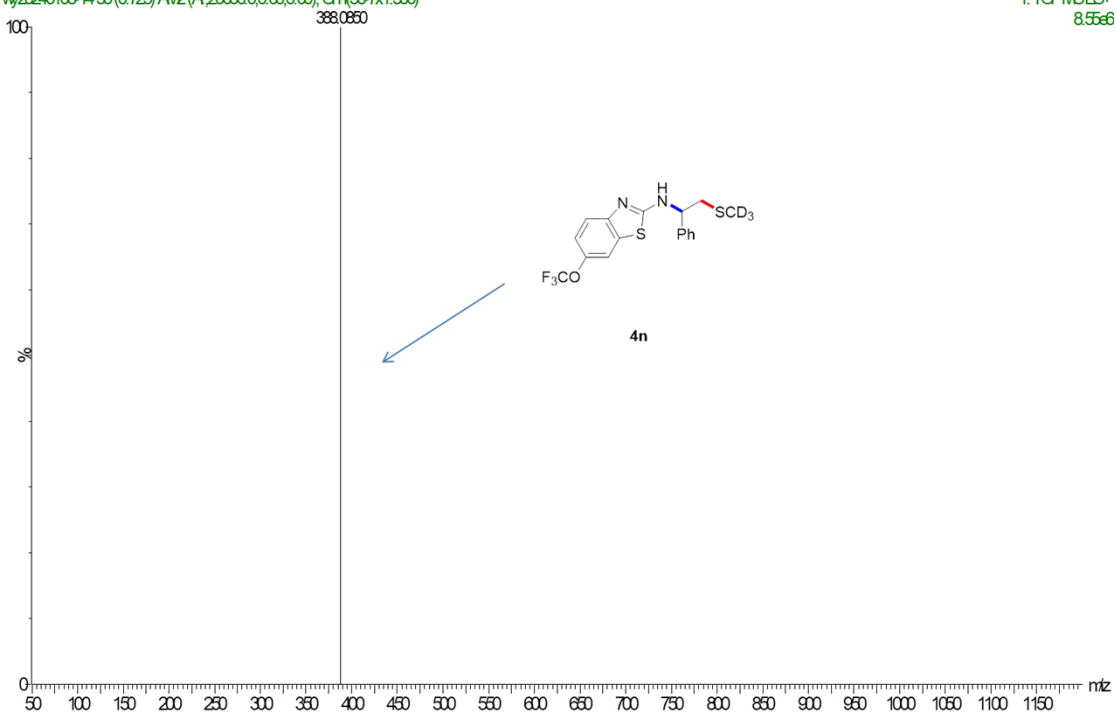

1648

wj20240108-15.34 (0.660) AM2 (Ar,20000.0,0.00,0.00); Cm(34-6x1.50)

1: TCFMSES+  
6.77e6

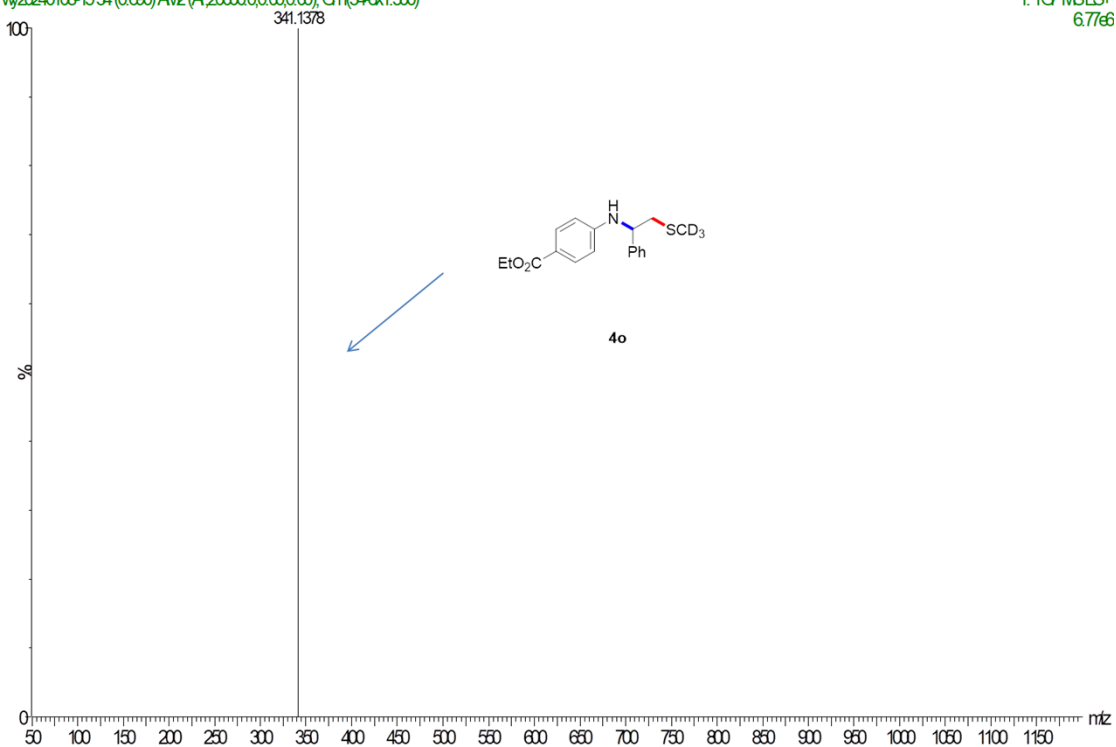

1508

wj20240108-16-450(1.001) AV2 (Ar,20000,0,0,00,0,00); Cm(50-7x1.500)

1: TCFMSEst-  
271e5

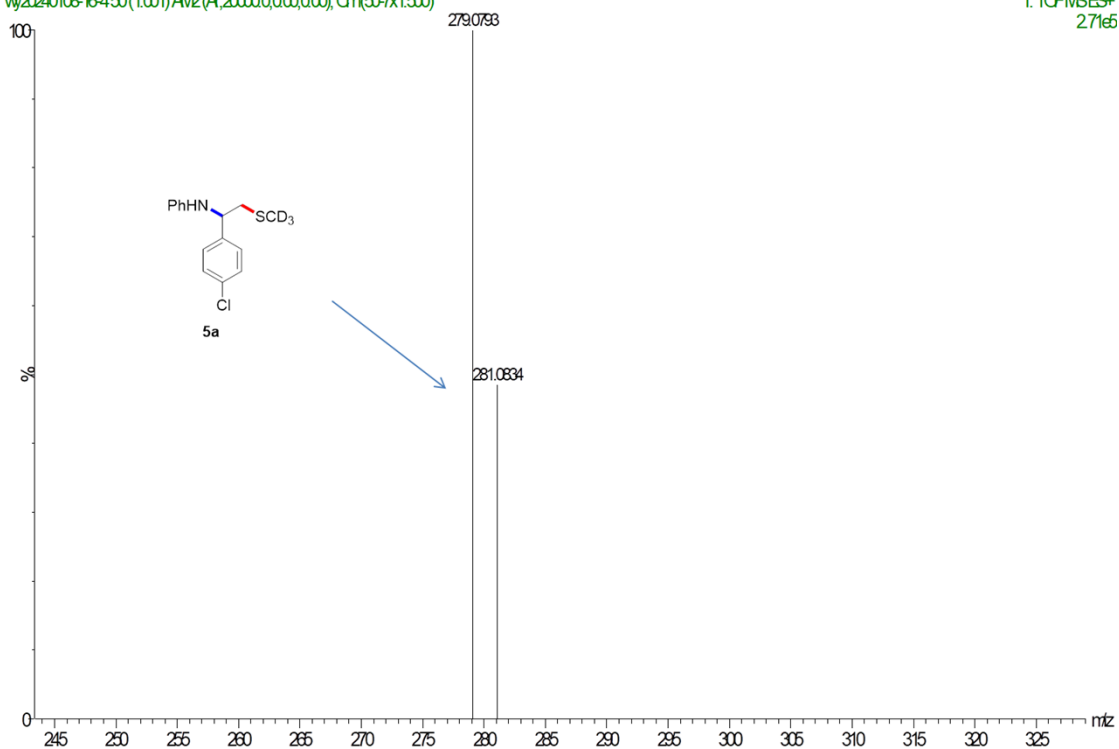

1617

wj20240108-17-269(1.361) AV2 (Ar,20000,0,0,00,0,00); Cm(69x1.500)

1: TCFMSEst-  
1.51e4

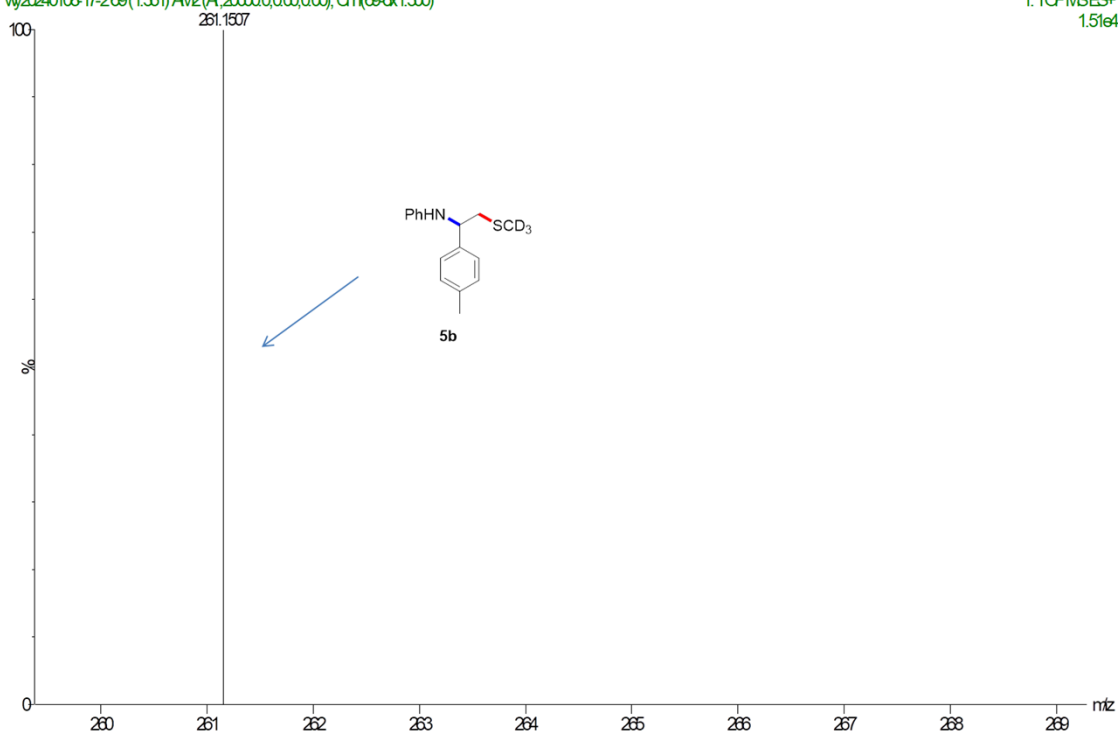

1509

wy20240108-18-273(1.449) AM2 (Ar,20000,0,0,0,0,0); Cm(73-4x1.50)

1: TCFMSESI-  
4.26e4

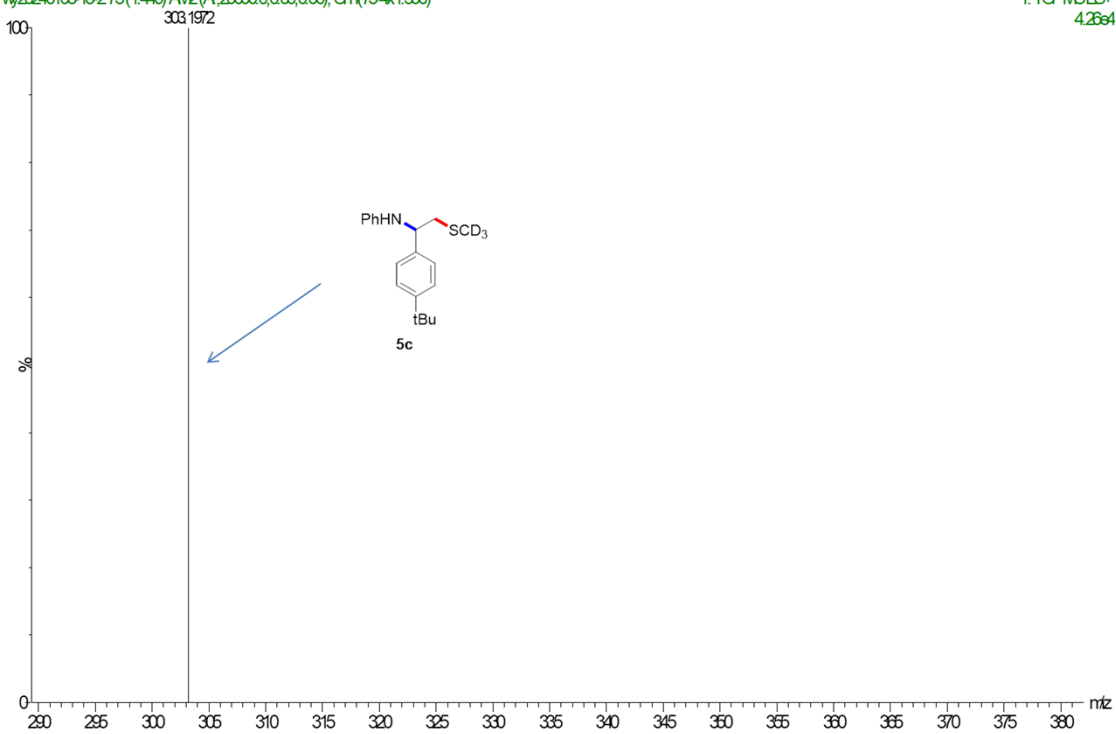

1514

wy20240108-19-261(1.205) AM2 (Ar,20000,0,0,0,0,0); Cm(61-6x1.50)

1: TCFMSESI-  
1.12e5

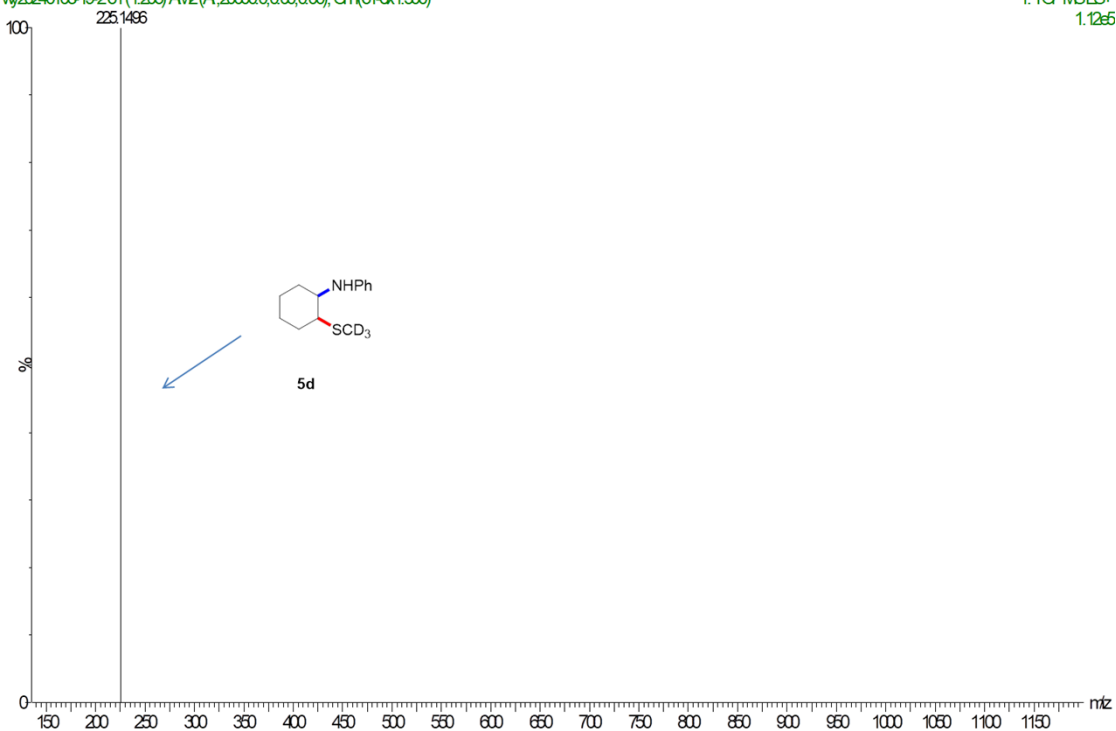

1614

wy20240108:20:2:25 (0.519) AM2 (Ar,20000,0,0,0,0,0); Cm(25-7x1.500)

1: TCFMSES+  
1.41e5

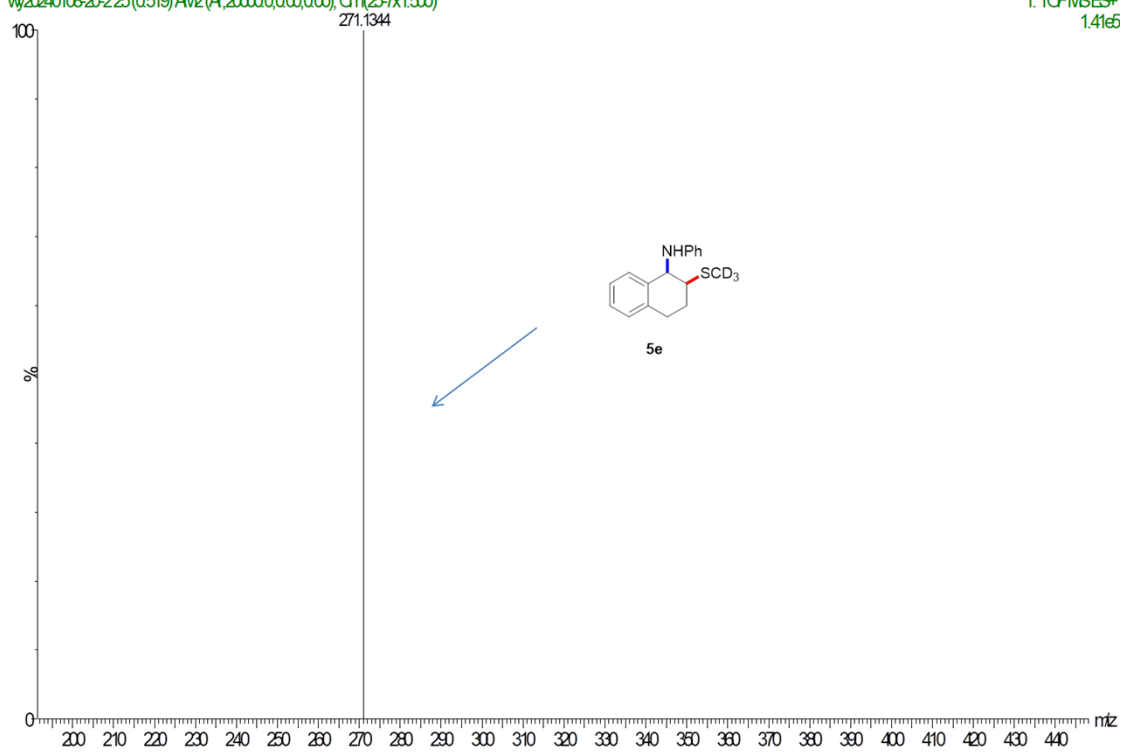

1515

wy20240108:21:24 (0.482) AM2 (Ar,20000,0,0,0,0,0); Cm(24-5x1.500)

1: TCFMSES+  
4.80e5

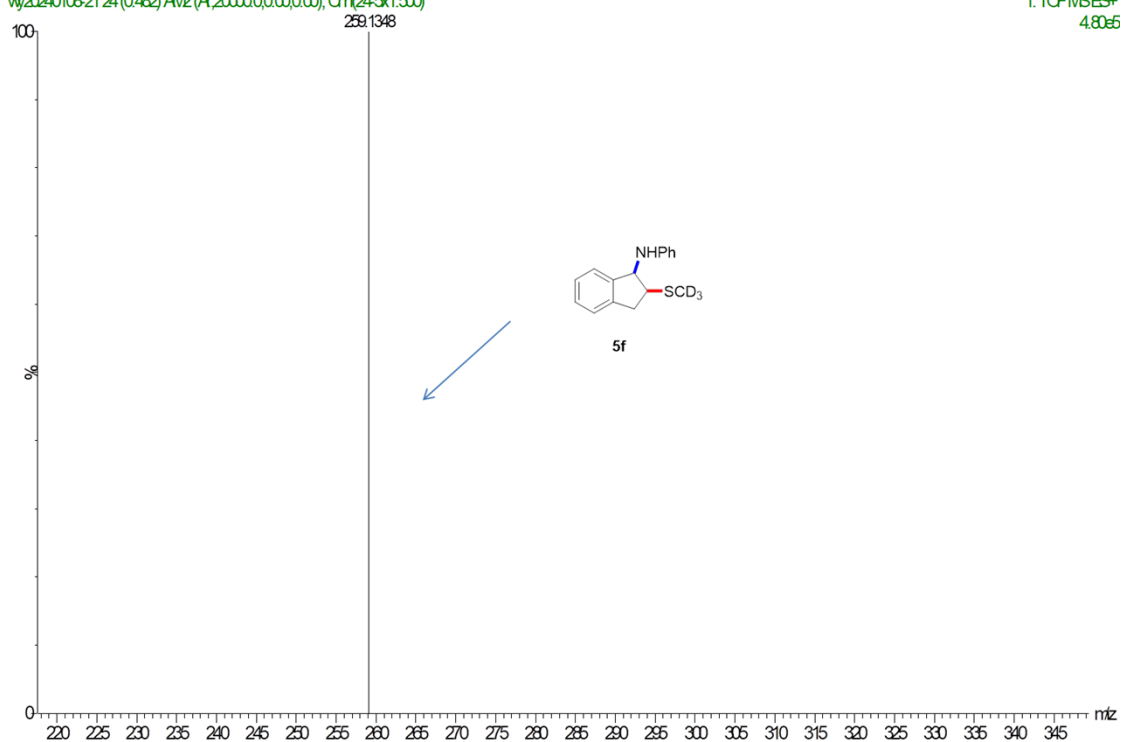



1687

wj20240108-22:215 (0.310) AM2 (Ar,20000,0,0,0,0,0)

1: TCFMSES+  
1.26e4

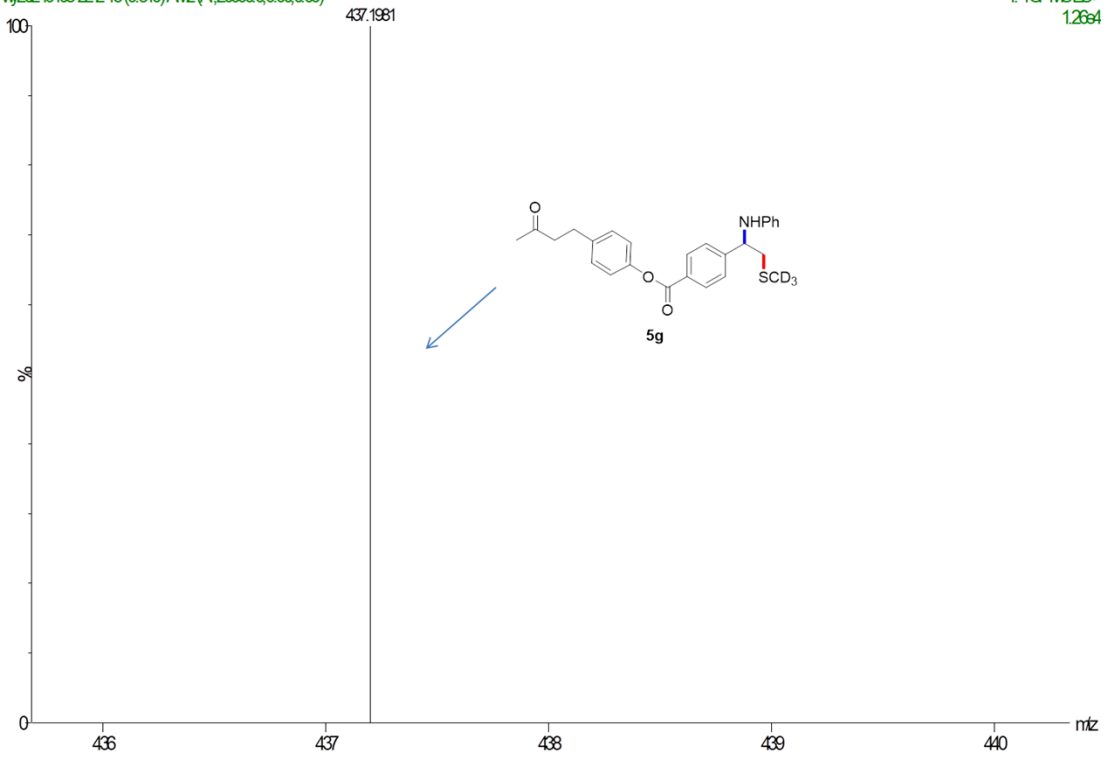

1733

wj20240108-23:30 (0.602) AM2 (Ar,20000,0,0,0,0,0); Cm(30-8x1.50)

1: TCFMSES+  
3.78e5

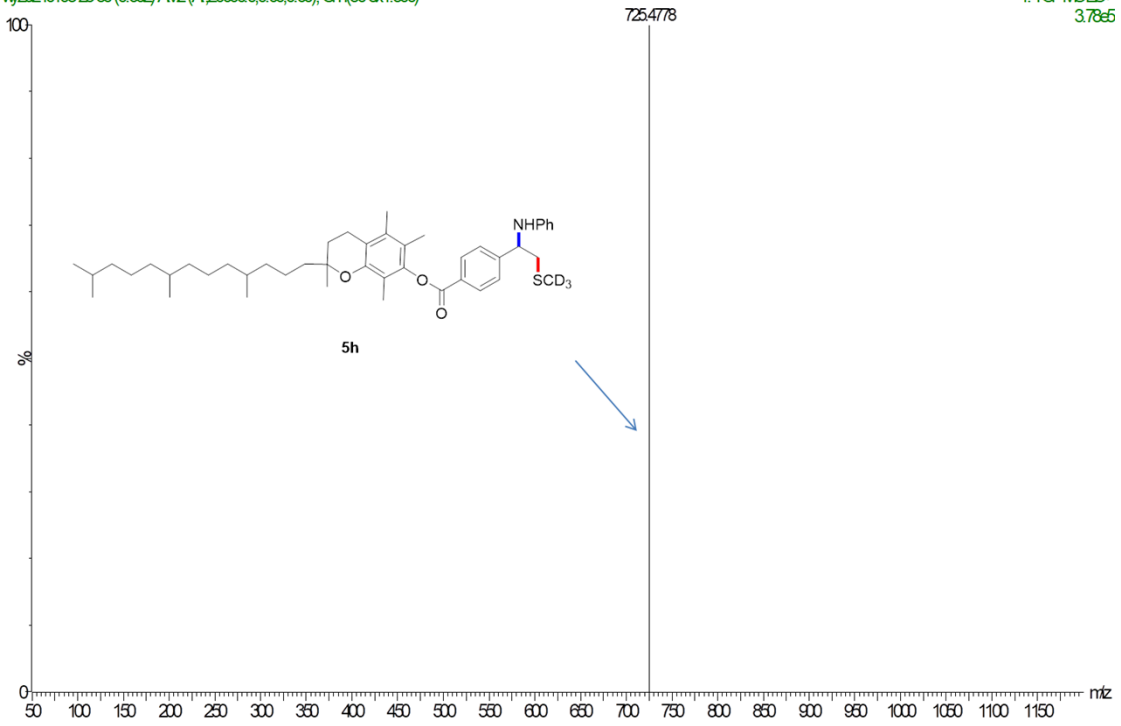

1374

wj20240108-24:2:36(0.724)AM2(Ar,20000,0,0,0,0,0); C<sub>11</sub>(35-5x1.500)

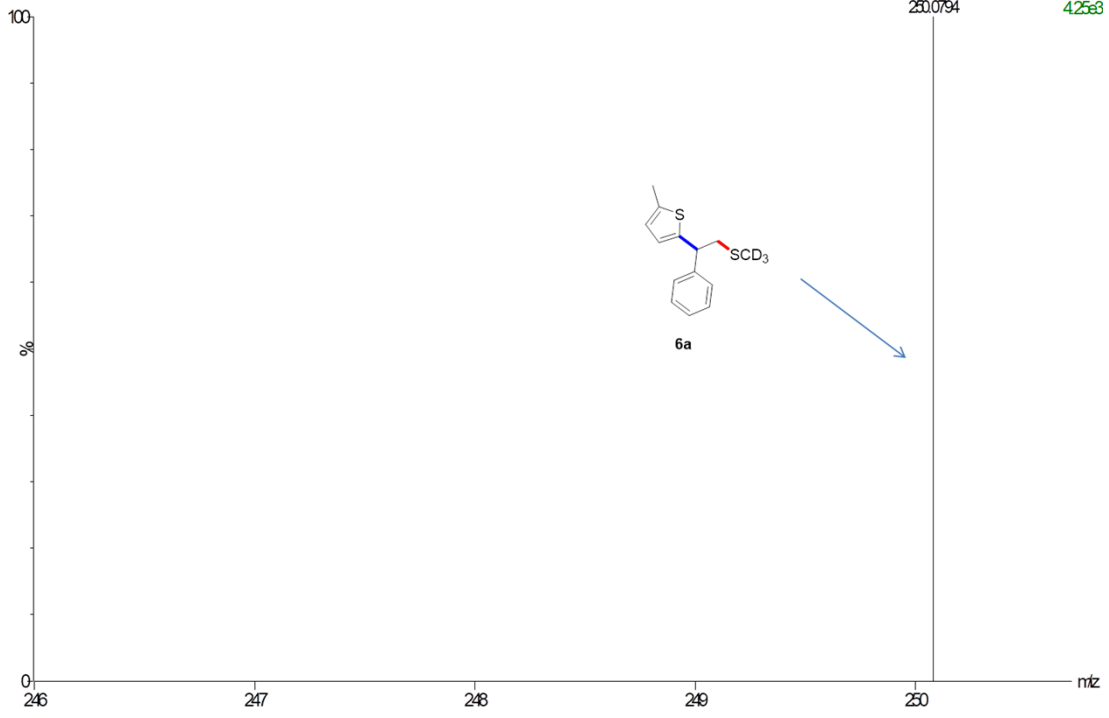

1521

wj20240108-25:35(0.708)AM2(Ar,20000,0,0,0,0,0); C<sub>11</sub>(35-7x1.500)

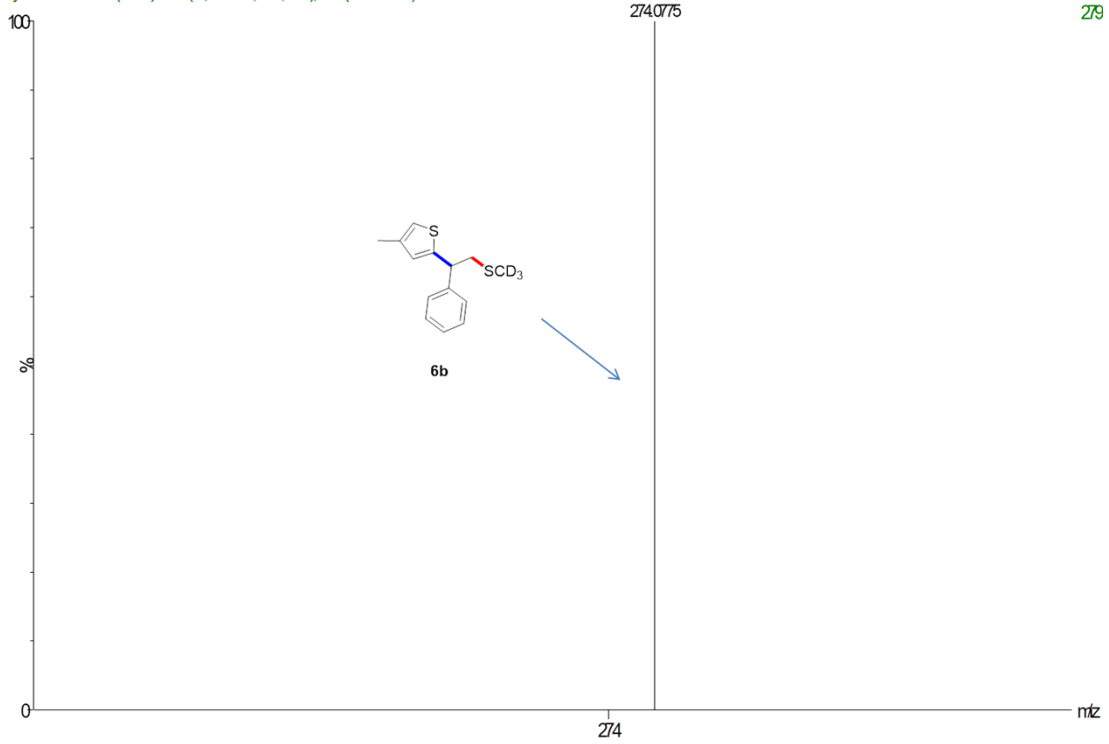

1546

wj20240108:27.61 (1.206) AM2 (Ar,20000,0,0,0,0,0); Cm(61-6x1.500)

1: TCFMSEst  
6.87e3

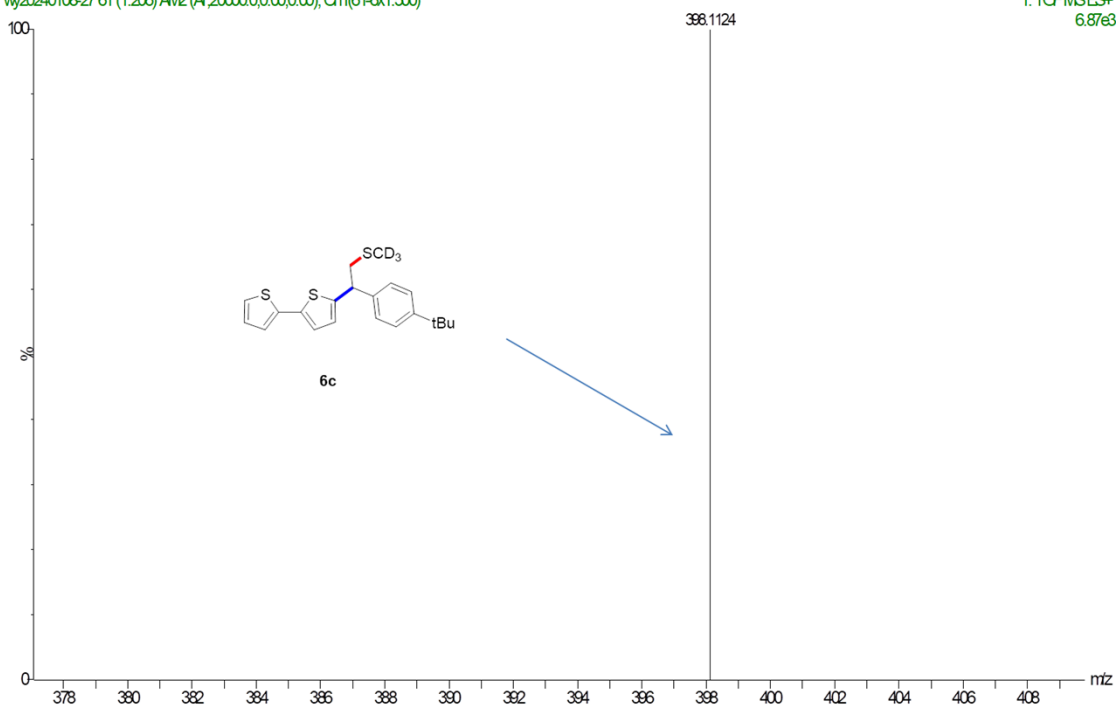

1555

wj20240108:28.26 (0.535) AM2 (Ar,20000,0,0,0,0,0); Cm(26-7x1.500)

1: TCFMSEst  
1.64e4

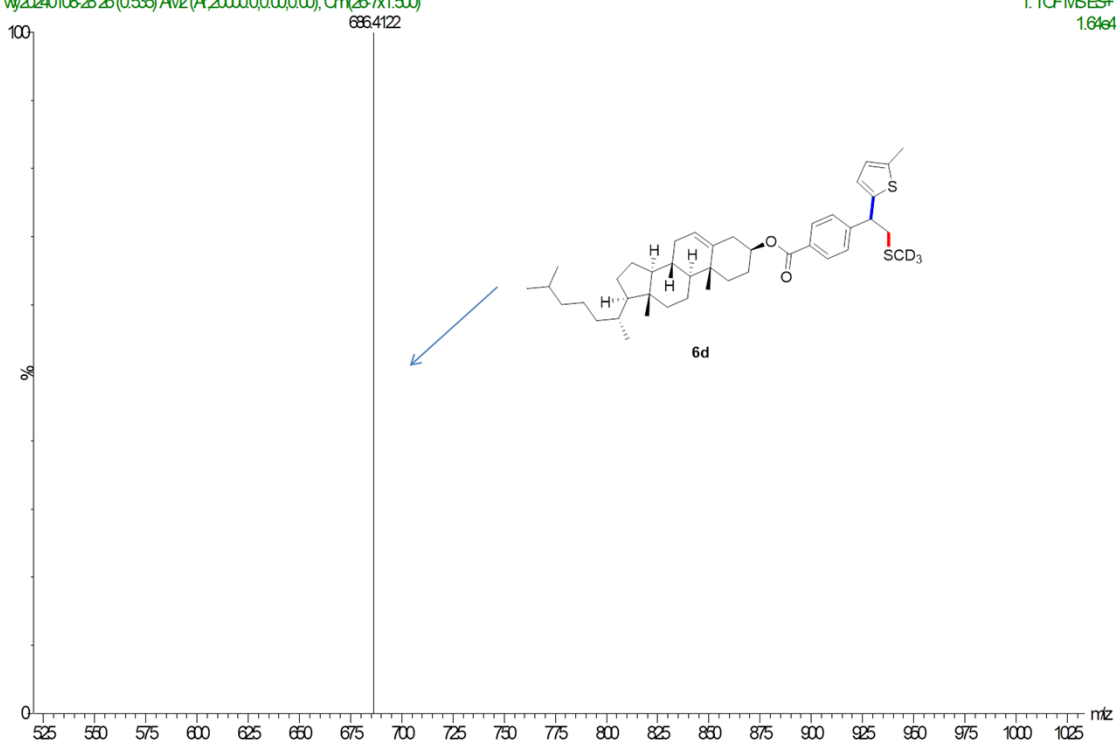

1628

wj20240108:29.45 (0.88) AM2 (A:20000.0,0.00,0.00); Cm(45.9x1.50)

1: TCFMSE+  
4.32e6

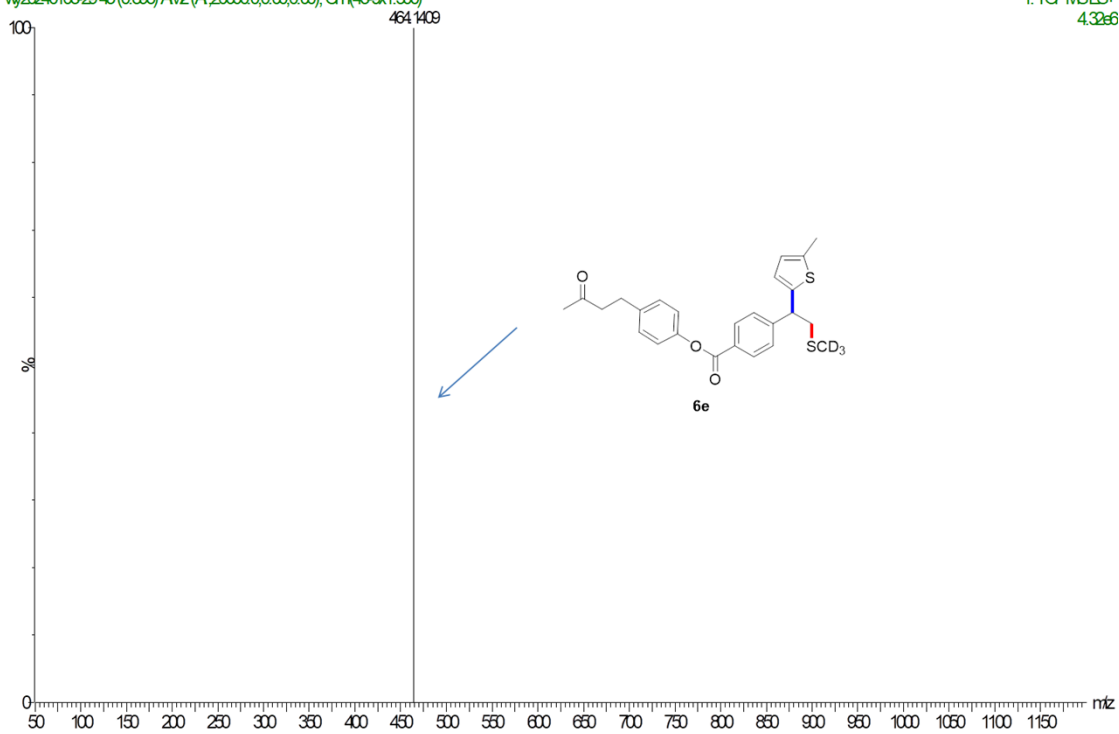

Supplement: d4qo01081g1.pdf [file d4qo01081g1.pdf]
